# Supplementary material
Source: publisher figshare collection journal article supplement (https://plos.figshare.com/articles/dataset/_/4744111)
Supplement: Supplementary file 1 [file 1 › S1 Fig.pdf]

A) *INDICA*

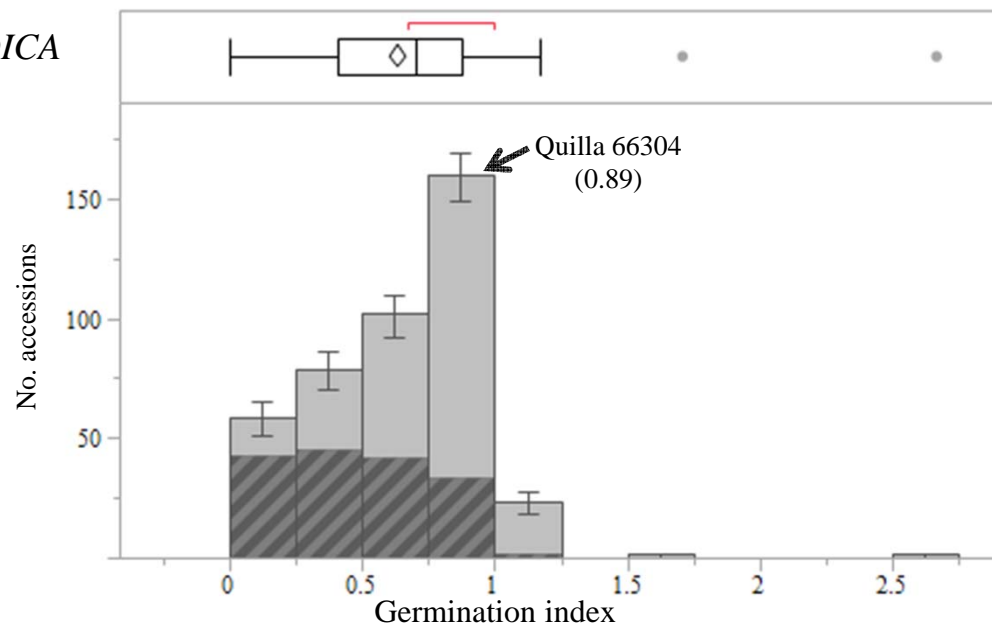

B) *JAPONICA*

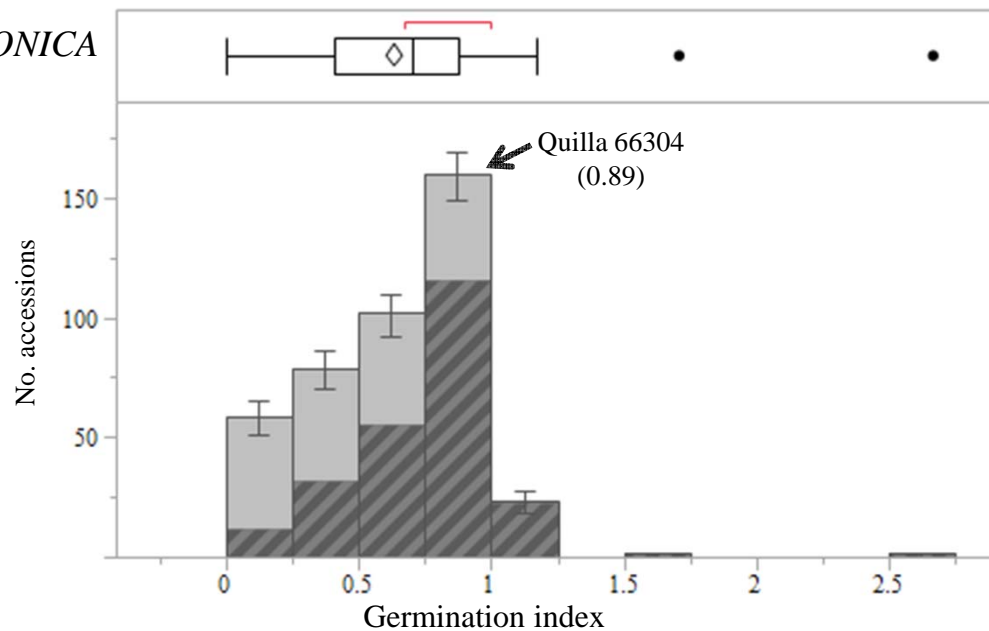

**S1 Fig. Frequency distribution of the adjusted cold germination ratio for the RDP1 *O. sativa* accessions.** Distribution of the “Germination Index” calculated as percentage of seeds with coleoptiles > 5mm in cold treatment to percentage of seeds with coleoptiles > 5 mm in warm treatment, across *ALL* RDP1 accessions is the sum of the gray and hash bars. The hash bars indicate the frequency distribution for the subset of A) *INDICA* (*indica*, *aus*, admix-*INDICA*) accessions and B) *JAPONICA* (*tropical japonica*, *temperate japonica*, admix-*JAPONICA*) accessions. Quantile box-and-whisker plots show the distribution observed values and the mean for the *INDICA* and *JAPONICA* accessions. The cold tolerant check, Quilla66304 is shown. (Table 1 lists additional statistics.)
