# Supplementary material
Source: publisher figshare collection journal article supplement (https://plos.figshare.com/articles/dataset/_/4744111)
Supplement: Supplementary file 1 [file 1 › S1 Table.xlsx]

## Sheet: ALL RDP1
Trait	Subpopulation group	SNP-Name	Chromo-some	SNP position (bp)	p-value
Germination index	ALL RDP1	SNP-1.938108.	1	939109	0.000595508
Germination index	ALL RDP1	SNP-1.952872.	1	953873	0.000784227
Germination index	ALL RDP1	SNP-1.955332.	1	956333	0.000581762
Germination index	ALL RDP1	SNP-1.955475.	1	956476	0.000675218
Germination index	ALL RDP1	SNP-1.955581.	1	956582	0.000299798
Germination index	ALL RDP1	SNP-1.961272.	1	962273	0.00081104
Germination index	ALL RDP1	SNP-1.962340.	1	963341	0.000825447
Germination index	ALL RDP1	SNP-1.963110.	1	964111	0.000527422
Germination index	ALL RDP1	SNP-1.963938.	1	964939	0.000743402
Germination index	ALL RDP1	SNP-1.963993.	1	964994	0.000739133
Germination index	ALL RDP1	SNP-1.997707.	1	998708	0.000941153
Germination index	ALL RDP1	SNP-1.999225.	1	1000226	0.000735486
Germination index	ALL RDP1	SNP-1.999711.	1	1000712	0.000598348
Germination index	ALL RDP1	SNP-1.999764.	1	1000765	0.000572544
Germination index	ALL RDP1	SNP-1.1000463.	1	1001464	0.00094625
Germination index	ALL RDP1	SNP-1.1003599.	1	1004600	0.000974504
Germination index	ALL RDP1	SNP-1.1004970.	1	1005971	0.00079023
Germination index	ALL RDP1	SNP-1.1009509.	1	1010510	0.000598348
Germination index	ALL RDP1	SNP-1.1009814.	1	1010815	0.000592365
Germination index	ALL RDP1	SNP-1.1010063.	1	1011064	0.000704959
Germination index	ALL RDP1	SNP-1.1010364.	1	1011365	0.000749076
Germination index	ALL RDP1	SNP-1.1030901.	1	1031902	0.000478714
Germination index	ALL RDP1	SNP-1.1041034.	1	1042035	0.000331085
Germination index	ALL RDP1	SNP-1.1063204.	1	1064205	0.000916412
Germination index	ALL RDP1	SNP-1.1065188.	1	1066189	0.0006307
Germination index	ALL RDP1	SNP-1.3765563.	1	3766564	0.000191431
Germination index	ALL RDP1	SNP-1.3835314.	1	3836315	0.000981113
Germination index	ALL RDP1	SNP-1.4152785.	1	4153786	0.000323645
Germination index	ALL RDP1	SNP-1.8160429.	1	8161430	0.000779206
Germination index	ALL RDP1	SNP-1.8176975.	1	8177976	0.000261401
Germination index	ALL RDP1	SNP-1.8189514.	1	8190515	9.44766e-05
Germination index	ALL RDP1	SNP-1.8189527.	1	8190528	4.23456e-05
Germination index	ALL RDP1	SNP-1.8196499.	1	8197500	0.000609527
Germination index	ALL RDP1	SNP-1.8227052.	1	8228053	0.000382416
Germination index	ALL RDP1	SNP-1.10880345.	1	10881370	0.000459342
Germination index	ALL RDP1	SNP-1.11068272.	1	11069297	0.000539788
Germination index	ALL RDP1	SNP-1.12726781.	1	12727808	0.000921465
Germination index	ALL RDP1	SNP-1.13769487.	1	13770514	0.000608807
Germination index	ALL RDP1	SNP-1.15432012.	1	15433039	0.000294513
Germination index	ALL RDP1	SNP-1.15676928.	1	15677955	0.000425836
Germination index	ALL RDP1	SNP-1.16524943.	1	16525970	0.000896838
Germination index	ALL RDP1	SNP-1.17675014.	1	17676061	0.000886006
Germination index	ALL RDP1	SNP-1.17922969.	1	17924016	0.000881793
Germination index	ALL RDP1	SNP-1.19993336.	1	19994382	0.000273099
Germination index	ALL RDP1	SNP-1.21367899.	1	21368945	4.86323e-05
Germination index	ALL RDP1	SNP-1.22986827.	1	22987872	0.000434923
Germination index	ALL RDP1	SNP-1.23287260.	1	23288305	0.000759633
Germination index	ALL RDP1	SNP-1.25244188.	1	25245233	0.000456867
Germination index	ALL RDP1	SNP-1.27059725.	1	27060770	0.000713065
Germination index	ALL RDP1	SNP-1.27950623.	1	27951668	0.000246222
Germination index	ALL RDP1	SNP-1.28440723.	1	28441769	0.000989745
Germination index	ALL RDP1	SNP-1.34610958.	1	34612002	0.000856771
Germination index	ALL RDP1	SNP-1.34610965.	1	34612009	0.000731234
Germination index	ALL RDP1	SNP-1.39268819.	1	39269863	0.000533819
Germination index	ALL RDP1	SNP-1.39830567.	1	39831611	0.000976644
Germination index	ALL RDP1	SNP-1.40328340.	1	40329384	0.000453632
Germination index	ALL RDP1	SNP-1.40891397.	1	40892441	0.000562791
Germination index	ALL RDP1	SNP-1.41516993.	1	41518037	0.000936554
Germination index	ALL RDP1	SNP-1.41578741.	1	41579785	0.000362677
Germination index	ALL RDP1	SNP-1.41586286.	1	41587330	0.000510225
Germination index	ALL RDP1	SNP-1.41590459.	1	41591503	0.000364012
Germination index	ALL RDP1	SNP-1.41590850.	1	41591894	0.000158146
Germination index	ALL RDP1	SNP-1.41590883.	1	41591927	0.000854382
Germination index	ALL RDP1	SNP-1.41597529.	1	41598573	0.000846669
Germination index	ALL RDP1	SNP-1.41602372.	1	41603416	0.000613205
Germination index	ALL RDP1	SNP-1.41602395.	1	41603439	8.78882e-05
Germination index	ALL RDP1	SNP-1.41609682.	1	41610726	0.000799043
Germination index	ALL RDP1	SNP-1.41609877.	1	41610921	0.000273332
Germination index	ALL RDP1	SNP-1.41610053.	1	41611097	0.000838171
Germination index	ALL RDP1	SNP-1.41612306.	1	41613350	0.000173814
Germination index	ALL RDP1	SNP-1.41628230.	1	41629274	0.000101601
Germination index	ALL RDP1	SNP-1.41628412.	1	41629456	0.000671805
Germination index	ALL RDP1	SNP-1.41630461.	1	41631505	0.000481319
Germination index	ALL RDP1	SNP-1.41690715.	1	41691759	0.000258593
Germination index	ALL RDP1	SNP-1.41693732.	1	41694776	0.000281884
Germination index	ALL RDP1	SNP-1.41694124.	1	41695168	0.000889395
Germination index	ALL RDP1	SNP-1.41694658.	1	41695702	0.000281884
Germination index	ALL RDP1	SNP-1.41696727.	1	41697771	0.000281884
Germination index	ALL RDP1	SNP-1.41706569.	1	41707613	0.000794098
Germination index	ALL RDP1	SNP-1.41708056.	1	41709100	0.000500047
Germination index	ALL RDP1	SNP-1.41731904.	1	41732948	0.000557445
Germination index	ALL RDP1	SNP-1.41778778.	1	41779822	0.000722842
Germination index	ALL RDP1	SNP-1.41785246.	1	41786290	0.000395125
Germination index	ALL RDP1	SNP-1.41997790.	1	41998834	2.00096e-05
Germination index	ALL RDP1	SNP-1.42036815.	1	42037859	0.000530896
Germination index	ALL RDP1	SNP-2.1068720.	2	1068721	0.000795819
Germination index	ALL RDP1	SNP-2.1082415.	2	1082416	0.000670381
Germination index	ALL RDP1	SNP-2.1092859.	2	1092860	0.000677189
Germination index	ALL RDP1	SNP-2.1322170.	2	1322171	0.00060758
Germination index	ALL RDP1	SNP-2.1329167.	2	1329168	0.00016554
Germination index	ALL RDP1	SNP-2.1364225.	2	1364226	0.000490301
Germination index	ALL RDP1	SNP-2.1367412.	2	1367413	0.000284085
Germination index	ALL RDP1	SNP-2.1655940.	2	1655941	0.000557203
Germination index	ALL RDP1	SNP-2.5572323.	2	5572324	0.000377531
Germination index	ALL RDP1	SNP-2.6037420.	2	6037421	0.000517931
Germination index	ALL RDP1	SNP-2.6207900.	2	6207901	0.000822717
Germination index	ALL RDP1	SNP-2.6557581.	2	6557582	3.60636e-05
Germination index	ALL RDP1	SNP-2.6557818.	2	6557819	2.98544e-05
Germination index	ALL RDP1	SNP-2.6562406.	2	6562407	0.000972389
Germination index	ALL RDP1	SNP-2.6624870.	2	6624871	0.000865469
Germination index	ALL RDP1	SNP-2.7024195.	2	7024196	0.000310213
Germination index	ALL RDP1	SNP-2.8487722.	2	8487724	0.000300394
Germination index	ALL RDP1	SNP-2.8800365.	2	8800368	0.000351204
Germination index	ALL RDP1	SNP-2.8885555.	2	8885558	0.000225213
Germination index	ALL RDP1	SNP-2.8897138.	2	8897141	0.000611608
Germination index	ALL RDP1	SNP-2.8905315.	2	8905318	0.000782158
Germination index	ALL RDP1	SNP-2.10658088.	2	10658091	0.000956796
Germination index	ALL RDP1	SNP-2.11387948.	2	11387953	0.000689193
Germination index	ALL RDP1	SNP-2.12729007.	2	12729012	0.000669017
Germination index	ALL RDP1	SNP-2.14085555.	2	14091426	0.000973471
Germination index	ALL RDP1	SNP-2.17359091.	2	17364962	0.000864684
Germination index	ALL RDP1	SNP-2.17707996.	2	17713867	3.89061e-05
Germination index	ALL RDP1	SNP-2.21767099.	2	21772969	0.000285927
Germination index	ALL RDP1	SNP-2.21769722.	2	21775592	0.000232951
Germination index	ALL RDP1	SNP-2.21791700.	2	21797570	0.000279645
Germination index	ALL RDP1	SNP-2.21792093.	2	21797963	7.65029e-05
Germination index	ALL RDP1	SNP-2.21802297.	2	21808167	0.000528213
Germination index	ALL RDP1	SNP-2.21824209.	2	21830079	0.000471906
Germination index	ALL RDP1	SNP-2.21867078.	2	21872948	0.000499921
Germination index	ALL RDP1	SNP-2.22100159.	2	22106029	5.94931e-05
Germination index	ALL RDP1	SNP-2.22644921.	2	22650791	0.000523886
Germination index	ALL RDP1	SNP-2.22650473.	2	22656343	9.00706e-05
Germination index	ALL RDP1	SNP-2.22655359.	2	22661229	1.38701e-05
Germination index	ALL RDP1	SNP-2.22656075.	2	22661945	1.80812e-05
Germination index	ALL RDP1	SNP-2.24625367.	2	24631237	0.000690647
Germination index	ALL RDP1	SNP-2.32429593.	2	32435463	0.000821934
Germination index	ALL RDP1	SNP-2.34601618.	2	34607488	0.000953594
Germination index	ALL RDP1	SNP-3.9475917.	3	9476982	0.000831217
Germination index	ALL RDP1	SNP-3.9475978.	3	9477043	0.000768438
Germination index	ALL RDP1	SNP-3.9936785.	3	9937850	0.000418388
Germination index	ALL RDP1	SNP-3.10595107.	3	10596192	0.000627137
Germination index	ALL RDP1	SNP-3.10600858.	3	10601943	0.000381277
Germination index	ALL RDP1	SNP-3.11022373.	3	11023656	0.000223701
Germination index	ALL RDP1	SNP-3.22172463.	3	22173957	0.000419417
Germination index	ALL RDP1	SNP-3.23111123.	3	23112636	0.00045102
Germination index	ALL RDP1	SNP-3.23140793.	3	23142306	0.000326596
Germination index	ALL RDP1	SNP-3.24964679.	3	24966600	0.000635433
Germination index	ALL RDP1	SNP-3.27626291.	3	27633239	0.000926909
Germination index	ALL RDP1	SNP-3.28132325.	3	28139272	2.77778e-06
Germination index	ALL RDP1	SNP-3.28552520.	3	28559468	0.000999502
Germination index	ALL RDP1	SNP-3.29513411.	3	29520372	0.000812355
Germination index	ALL RDP1	SNP-3.29680379.	3	29687340	0.000976396
Germination index	ALL RDP1	SNP-3.30380288.	3	30387400	0.000481499
Germination index	ALL RDP1	SNP-3.31418513.	3	31425629	0.000278866
Germination index	ALL RDP1	SNP-3.32835863.	3	32842994	0.000565426
Germination index	ALL RDP1	SNP-3.35915930.	3	35923062	0.000704073
Germination index	ALL RDP1	SNP-4.893358.	4	894359	0.000574184
Germination index	ALL RDP1	SNP-4.1099484.	4	1103935	0.000290384
Germination index	ALL RDP1	SNP-4.1105928.	4	1110379	0.000517998
Germination index	ALL RDP1	SNP-4.1112236.	4	1116687	5.62563e-05
Germination index	ALL RDP1	SNP-4.1643889.	4	1648341	0.000457268
Germination index	ALL RDP1	SNP-4.2464308.	4	2468711	0.000723893
Germination index	ALL RDP1	SNP-4.5373529.	4	5378089	0.000141275
Germination index	ALL RDP1	SNP-4.12066075.	4	12075365	0.000964519
Germination index	ALL RDP1	SNP-4.15743591.	4	15915559	0.000600564
Germination index	ALL RDP1	SNP-4.17545392.	4	17717354	0.000366453
Germination index	ALL RDP1	SNP-4.18781340.	4	18953294	0.000232107
Germination index	ALL RDP1	SNP-4.18784185.	4	18956139	0.000814613
Germination index	ALL RDP1	SNP-4.22255446.	4	22440564	0.000861105
Germination index	ALL RDP1	SNP-4.26855470.	4	27040598	0.000804717
Germination index	ALL RDP1	SNP-4.27141356.	4	27326489	0.000880116
Germination index	ALL RDP1	SNP-4.30806640.	4	30991761	0.000709977
Germination index	ALL RDP1	SNP-4.30862190.	4	31047306	0.000911649
Germination index	ALL RDP1	SNP-4.30971352.	4	31156462	0.00050406
Germination index	ALL RDP1	SNP-4.30971810.	4	31156920	0.000352213
Germination index	ALL RDP1	SNP-4.30974019.	4	31159129	0.00037821
Germination index	ALL RDP1	SNP-4.30981660.	4	31166770	0.000994012
Germination index	ALL RDP1	SNP-4.31674071.	4	31859178	0.000900018
Germination index	ALL RDP1	SNP-4.31953276.	4	32138386	0.000911879
Germination index	ALL RDP1	SNP-4.32045368.	4	32230477	0.000167536
Germination index	ALL RDP1	SNP-4.32281041.	4	32466150	0.000167367
Germination index	ALL RDP1	SNP-5.4377674.	5	4377698	0.000475299
Germination index	ALL RDP1	SNP-5.17839398.	5	17899913	0.000993359
Germination index	ALL RDP1	SNP-5.18496969.	5	18559619	0.000243088
Germination index	ALL RDP1	SNP-5.18562208.	5	18624726	0.000145526
Germination index	ALL RDP1	SNP-5.20740065.	5	20802625	0.000834616
Germination index	ALL RDP1	SNP-5.21586838.	5	21649397	0.000116145
Germination index	ALL RDP1	SNP-5.23912785.	5	23975365	0.000168941
Germination index	ALL RDP1	SNP-5.24292810.	5	24355390	0.000919844
Germination index	ALL RDP1	SNP-5.24494456.	5	24557036	0.000177541
Germination index	ALL RDP1	SNP-5.25219800.	5	25282380	0.000794656
Germination index	ALL RDP1	SNP-5.25318572.	5	25381152	0.000613218
Germination index	ALL RDP1	SNP-6.998049.	6	999049	0.000751795
Germination index	ALL RDP1	SNP-6.1423035.	6	1424035	0.000780805
Germination index	ALL RDP1	SNP-6.2394083.	6	2395083	0.00016941
Germination index	ALL RDP1	SNP-6.3219322.	6	3220322	0.000444106
Germination index	ALL RDP1	SNP-6.4498356.	6	4499356	0.000718084
Germination index	ALL RDP1	SNP-6.4568793.	6	4569793	0.000312519
Germination index	ALL RDP1	SNP-6.5892203.	6	5893203	0.000173806
Germination index	ALL RDP1	SNP-6.6141057.	6	6142057	0.000995866
Germination index	ALL RDP1	SNP-6.6141403.	6	6142403	0.000240528
Germination index	ALL RDP1	SNP-6.6177019.	6	6178019	0.0001835
Germination index	ALL RDP1	SNP-6.6189801.	6	6190801	0.000400069
Germination index	ALL RDP1	SNP-6.6225771.	6	6226771	0.000747564
Germination index	ALL RDP1	SNP-6.6791888.	6	6792888	0.000578776
Germination index	ALL RDP1	SNP-6.11158730.	6	11159730	0.000608632
Germination index	ALL RDP1	SNP-6.16524491.	6	16525490	5.11447e-05
Germination index	ALL RDP1	SNP-6.22318616.	6	22319614	0.000757375
Germination index	ALL RDP1	SNP-6.22490333.	6	22491331	0.000587679
Germination index	ALL RDP1	SNP-6.25872709.	6	25873707	0.000683285
Germination index	ALL RDP1	SNP-6.26858379.	6	26859377	0.000780044
Germination index	ALL RDP1	SNP-6.31224098.	6	31225097	0.000612033
Germination index	ALL RDP1	SNP-7.9943299.	7	9944294	0.000602834
Germination index	ALL RDP1	SNP-7.12555155.	7	12556149	0.000737926
Germination index	ALL RDP1	SNP-7.13602494.	7	13603488	0.000540545
Germination index	ALL RDP1	SNP-7.17132531.	7	17133525	0.000266245
Germination index	ALL RDP1	SNP-7.17342217.	7	17343211	7.07889e-05
Germination index	ALL RDP1	SNP-7.17342655.	7	17343649	0.000164973
Germination index	ALL RDP1	SNP-7.17348991.	7	17349985	0.000975945
Germination index	ALL RDP1	SNP-7.17349645.	7	17350639	0.000723702
Germination index	ALL RDP1	SNP-7.17352293.	7	17353287	0.00025895
Germination index	ALL RDP1	SNP-7.19586939.	7	19587933	0.000831341
Germination index	ALL RDP1	SNP-7.19793035.	7	19794029	0.000603931
Germination index	ALL RDP1	SNP-7.19884718.	7	19885712	0.000838447
Germination index	ALL RDP1	SNP-7.19967973.	7	19968967	0.000872224
Germination index	ALL RDP1	SNP-7.20008228.	7	20009222	0.000298254
Germination index	ALL RDP1	SNP-7.20049921.	7	20050915	0.000481336
Germination index	ALL RDP1	SNP-7.20064545.	7	20065539	0.000930654
Germination index	ALL RDP1	SNP-7.20103658.	7	20104652	0.000211682
Germination index	ALL RDP1	SNP-7.20122400.	7	20123394	0.000827886
Germination index	ALL RDP1	SNP-7.20129615.	7	20130609	0.000341905
Germination index	ALL RDP1	SNP-7.20132717.	7	20133711	0.000354676
Germination index	ALL RDP1	SNP-7.20133264.	7	20134258	4.68937e-05
Germination index	ALL RDP1	SNP-7.20170378.	7	20171372	8.54065e-05
Germination index	ALL RDP1	SNP-7.20209082.	7	20210076	0.000619407
Germination index	ALL RDP1	SNP-7.20259942.	7	20260936	0.000681749
Germination index	ALL RDP1	SNP-7.20261326.	7	20262320	0.000803219
Germination index	ALL RDP1	SNP-7.20600111.	7	20601105	2.40139e-05
Germination index	ALL RDP1	SNP-7.22581957.	7	22582951	0.000197378
Germination index	ALL RDP1	SNP-7.25399888.	7	25400883	0.000193749
Germination index	ALL RDP1	SNP-7.26201609.	7	26202604	0.000662881
Germination index	ALL RDP1	SNP-7.26237734.	7	26238729	0.000315922
Germination index	ALL RDP1	SNP-7.26492040.	7	26493035	0.000950932
Germination index	ALL RDP1	SNP-8.2959268.	8	2960266	0.000890997
Germination index	ALL RDP1	SNP-8.4666660.	8	4667658	0.000569506
Germination index	ALL RDP1	SNP-8.5115027.	8	5116025	0.000149745
Germination index	ALL RDP1	SNP-8.5789228.	8	5790226	0.000258665
Germination index	ALL RDP1	SNP-8.6144022.	8	6145018	2.25034e-05
Germination index	ALL RDP1	SNP-8.7294436.	8	7295432	0.000468084
Germination index	ALL RDP1	SNP-8.8441535.	8	8442532	0.000465655
Germination index	ALL RDP1	SNP-8.10089075.	8	10090072	0.000555475
Germination index	ALL RDP1	SNP-8.10148786.	8	10149783	0.00065862
Germination index	ALL RDP1	SNP-8.10168478.	8	10169475	0.000403109
Germination index	ALL RDP1	SNP-8.10271696.	8	10272693	0.000988711
Germination index	ALL RDP1	SNP-8.10341044.	8	10342041	0.000951798
Germination index	ALL RDP1	SNP-8.10437350.	8	10438347	0.000688719
Germination index	ALL RDP1	SNP-8.10455356.	8	10456353	0.000838871
Germination index	ALL RDP1	SNP-8.10473988.	8	10474985	0.000771438
Germination index	ALL RDP1	SNP-8.10475183.	8	10476180	5.68541e-05
Germination index	ALL RDP1	SNP-8.10503711.	8	10504708	0.000350684
Germination index	ALL RDP1	SNP-8.10511005.	8	10512002	0.000847374
Germination index	ALL RDP1	SNP-8.10645083.	8	10646080	0.000418333
Germination index	ALL RDP1	SNP-8.10902092.	8	10903088	0.00099411
Germination index	ALL RDP1	SNP-8.12269949.	8	12270945	0.000621698
Germination index	ALL RDP1	SNP-8.12303634.	8	12304630	0.000714238
Germination index	ALL RDP1	SNP-8.12306893.	8	12307889	0.000714768
Germination index	ALL RDP1	SNP-8.14978436.	8	14981151	0.000997605
Germination index	ALL RDP1	SNP-8.15163723.	8	15166438	0.000965684
Germination index	ALL RDP1	SNP-8.15508065.	8	15510780	0.000723314
Germination index	ALL RDP1	SNP-8.15799667.	8	15802382	0.000650565
Germination index	ALL RDP1	SNP-8.15908404.	8	15911119	0.000906437
Germination index	ALL RDP1	SNP-8.15925826.	8	15928541	0.000547535
Germination index	ALL RDP1	SNP-8.16161798.	8	16164513	0.000671329
Germination index	ALL RDP1	SNP-8.17430421.	8	17433136	0.000726269
Germination index	ALL RDP1	SNP-8.19844285.	8	19846999	0.000939003
Germination index	ALL RDP1	SNP-8.24035909.	8	24038624	0.000324103
Germination index	ALL RDP1	SNP-8.27311150.	8	27313865	0.000932186
Germination index	ALL RDP1	SNP-9.6550570.	9	6551571	0.000357333
Germination index	ALL RDP1	SNP-9.7134949.	9	7135950	0.00073354
Germination index	ALL RDP1	SNP-9.10805133.	9	10806135	0.000367621
Germination index	ALL RDP1	SNP-9.10910835.	9	10911837	0.00094097
Germination index	ALL RDP1	SNP-9.11024848.	9	11025850	0.000608164
Germination index	ALL RDP1	SNP-9.11093605.	9	11094607	0.000795343
Germination index	ALL RDP1	SNP-9.12369548.	9	12370550	0.000600957
Germination index	ALL RDP1	SNP-9.12900938.	9	12901940	0.000194533
Germination index	ALL RDP1	SNP-9.12943870.	9	12944872	6.81804e-05
Germination index	ALL RDP1	SNP-9.15966721.	9	15967723	0.000718944
Germination index	ALL RDP1	SNP-9.17433249.	9	17434251	0.000431495
Germination index	ALL RDP1	SNP-9.17871960.	9	17872962	0.000330145
Germination index	ALL RDP1	SNP-9.19143358.	9	19143770	0.000677063
Germination index	ALL RDP1	SNP-9.19466472.	9	19466883	0.000228701
Germination index	ALL RDP1	SNP-9.19751798.	9	19752280	0.00067097
Germination index	ALL RDP1	SNP-9.19763534.	9	19764016	0.000741713
Germination index	ALL RDP1	SNP-9.19765483.	9	19765965	0.000463588
Germination index	ALL RDP1	SNP-9.19768140.	9	19768622	0.000938261
Germination index	ALL RDP1	SNP-9.19872203.	9	19872685	0.000562797
Germination index	ALL RDP1	SNP-9.22423757.	9	22424239	0.000391205
Germination index	ALL RDP1	SNP-9.22674463.	9	22674945	0.000590926
Germination index	ALL RDP1	SNP-10.81214.	10	82215	0.000703035
Germination index	ALL RDP1	SNP-10.1402489.	10	1403513	0.00056343
Germination index	ALL RDP1	SNP-10.1519079.	10	1520103	0.000252196
Germination index	ALL RDP1	SNP-10.1525014.	10	1526038	0.000547395
Germination index	ALL RDP1	SNP-10.3008454.	10	3009478	0.000643153
Germination index	ALL RDP1	SNP-10.3008900.	10	3009924	0.000521348
Germination index	ALL RDP1	SNP-10.3009026.	10	3010050	0.000728253
Germination index	ALL RDP1	SNP-10.3110829.	10	3111853	0.000701539
Germination index	ALL RDP1	SNP-10.3590020.	10	3591044	0.000826701
Germination index	ALL RDP1	SNP-10.4145391.	10	4192816	0.000196048
Germination index	ALL RDP1	SNP-10.4977847.	10	4961311	0.000377622
Germination index	ALL RDP1	SNP-10.8766058.	10	8837197	0.000422451
Germination index	ALL RDP1	SNP-10.9337681.	10	9408861	0.000919861
Germination index	ALL RDP1	SNP-10.11168095.	10	11239276	0.000861902
Germination index	ALL RDP1	SNP-10.11686778.	10	11757964	0.000881916
Germination index	ALL RDP1	SNP-10.12181174.	10	12252360	0.000562786
Germination index	ALL RDP1	SNP-10.13467331.	10	13538562	0.000755956
Germination index	ALL RDP1	SNP-10.13506391.	10	13577622	0.000811894
Germination index	ALL RDP1	SNP-10.13652407.	10	13723639	0.000676895
Germination index	ALL RDP1	SNP-10.13807082.	10	13878315	0.000860128
Germination index	ALL RDP1	SNP-10.13908320.	10	13979555	0.000521317
Germination index	ALL RDP1	SNP-10.14114177.	10	14185412	0.000242848
Germination index	ALL RDP1	SNP-10.14251846.	10	14323081	0.000736517
Germination index	ALL RDP1	SNP-10.15912968.	10	15984197	0.000373216
Germination index	ALL RDP1	SNP-10.16957194.	10	17028423	0.000866199
Germination index	ALL RDP1	SNP-10.17054871.	10	17126100	0.000258365
Germination index	ALL RDP1	SNP-10.18543640.	10	18615084	0.000862684
Germination index	ALL RDP1	SNP-10.19945193.	10	20016695	0.000961134
Germination index	ALL RDP1	SNP-10.20004475.	10	20075978	0.000992294
Germination index	ALL RDP1	SNP-11.5586045.	11	5590294	0.00028797
Germination index	ALL RDP1	SNP-11.5586813.	11	5591062	0.00054783
Germination index	ALL RDP1	SNP-11.5588977.	11	5593226	0.0008631
Germination index	ALL RDP1	SNP-11.5589802.	11	5594051	0.000832058
Germination index	ALL RDP1	SNP-11.5737309.	11	5741558	0.000599634
Germination index	ALL RDP1	SNP-11.6374503.	11	6378752	1.61272e-05
Germination index	ALL RDP1	SNP-11.10007572.	11	10012996	0.000360367
Germination index	ALL RDP1	SNP-11.10177415.	11	10182839	0.000785658
Germination index	ALL RDP1	SNP-11.10195298.	11	10200722	0.000848741
Germination index	ALL RDP1	SNP-11.10950565.	11	10956249	0.000481993
Germination index	ALL RDP1	SNP-11.13231563.	11	13695242	0.000373078
Germination index	ALL RDP1	SNP-11.13303033.	11	13766713	0.000124201
Germination index	ALL RDP1	SNP-11.13641164.	11	14104844	1.20845e-05
Germination index	ALL RDP1	SNP-11.14479866.	11	14943553	0.000984051
Germination index	ALL RDP1	SNP-11.15163173.	11	15626863	0.000890611
Germination index	ALL RDP1	SNP-11.15278975.	11	15742667	1.69891e-06
Germination index	ALL RDP1	SNP-11.15393791.	11	15857482	0.000981965
Germination index	ALL RDP1	SNP-11.15738949.	11	16204080	0.000903046
Germination index	ALL RDP1	SNP-11.16238462.	11	16703586	0.000859294
Germination index	ALL RDP1	SNP-11.16255085.	11	16720209	0.000825276
Germination index	ALL RDP1	SNP-11.16860861.	11	17327010	0.00071377
Germination index	ALL RDP1	SNP-11.16938941.	11	17405089	0.000982132
Germination index	ALL RDP1	SNP-11.19241550.	11	19707863	0.000852561
Germination index	ALL RDP1	SNP-11.19244444.	11	19710757	0.000426243
Germination index	ALL RDP1	SNP-11.20500255.	11	20966383	0.000660453
Germination index	ALL RDP1	SNP-11.22304886.	11	22771016	0.000991517
Germination index	ALL RDP1	SNP-11.22647177.	11	23113307	0.000733709
Germination index	ALL RDP1	SNP-11.24623164.	11	25089325	0.000506254
Germination index	ALL RDP1	SNP-12.2125961.	12	2126964	0.000176535
Germination index	ALL RDP1	SNP-12.2383712.	12	2384712	0.000339159
Germination index	ALL RDP1	SNP-12.4402637.	12	4403650	9.06459e-05
Germination index	ALL RDP1	SNP-12.4740623.	12	4741639	0.000946301
Germination index	ALL RDP1	SNP-12.4745377.	12	4746393	0.000618849
Germination index	ALL RDP1	SNP-12.7599026.	12	7601622	0.000242347
Germination index	ALL RDP1	SNP-12.12253762.	12	12256425	0.000324081
Germination index	ALL RDP1	SNP-12.13957850.	12	13960511	0.000875054
Germination index	ALL RDP1	SNP-12.14004222.	12	14006883	0.000261458
Germination index	ALL RDP1	SNP-12.19432842.	12	19461373	0.000438063
Germination index	ALL RDP1	SNP-12.20883884.	12	20917336	0.00027873
Germination index	ALL RDP1	SNP-12.26281091.	12	26314698	0.000611092
Germination index	ALL RDP1	SNP-12.26299712.	12	26333319	0.00077053
Germination index	ALL RDP1	SNP-12.26320241.	12	26353848	0.000654698
Germination index	ALL RDP1	SNP-12.26332538.	12	26366145	0.000321859
Germination index	ALL RDP1	SNP-12.26354330.	12	26387937	0.000764019
Germination index	ALL RDP1	SNP-12.26372244.	12	26405851	0.000908189
Germination index	ALL RDP1	SNP-12.26390490.	12	26424097	0.000421366
Germination index	ALL RDP1	SNP-12.26392450.	12	26426057	0.000254925
Germination index	ALL RDP1	SNP-12.26954503.	12	26988105	0.000476012
Germination index	ALL RDP1	SNP-12.27161990.	12	27195591	0.000653303
Germination index	ALL RDP1	SNP-12.27247681.	12	27281282	0.000839894

## Sheet: INDICA
Trait	Subpopulation group	SNP-Name	Chromo-some	SNP position (bp)	p-value
Germination index	INDICA	SNP-1.955581.	1	956582	0.000471394
Germination index	INDICA	SNP-1.2056718.	1	2057719	0.000566717
Germination index	INDICA	SNP-1.2115005.	1	2116006	0.000291557
Germination index	INDICA	SNP-1.2933789.	1	2934790	0.000987723
Germination index	INDICA	SNP-1.6804707.	1	6805708	0.000330275
Germination index	INDICA	SNP-1.6812076.	1	6813077	0.000466682
Germination index	INDICA	SNP-1.7536360.	1	7537361	0.000643885
Germination index	INDICA	SNP-1.8189527.	1	8190528	0.000347537
Germination index	INDICA	SNP-1.8263278.	1	8264279	0.000631549
Germination index	INDICA	SNP-1.10397473.	1	10398498	0.00070858
Germination index	INDICA	SNP-1.13497837.	1	13498864	0.000848393
Germination index	INDICA	SNP-1.14779092.	1	14780119	0.000718954
Germination index	INDICA	SNP-1.17731506.	1	17732553	0.000635131
Germination index	INDICA	SNP-1.19076263.	1	19077309	0.000763872
Germination index	INDICA	SNP-1.20187688.	1	20188734	0.000507597
Germination index	INDICA	SNP-1.28747361.	1	28748407	0.000904089
Germination index	INDICA	SNP-1.30510505.	1	30511550	0.000815915
Germination index	INDICA	SNP-1.30627643.	1	30628688	0.000145451
Germination index	INDICA	SNP-1.34371364.	1	34372408	0.000832701
Germination index	INDICA	SNP-1.40891397.	1	40892441	0.000281885
Germination index	INDICA	SNP-1.41597529.	1	41598573	0.000892642
Germination index	INDICA	SNP-1.42030342.	1	42031386	0.000287566
Germination index	INDICA	SNP-1.42875208.	1	42876253	0.000746766
Germination index	INDICA	SNP-2.1329167.	2	1329168	0.000613503
Germination index	INDICA	SNP-2.1334062.	2	1334063	0.000958274
Germination index	INDICA	SNP-2.1362866.	2	1362867	0.000863332
Germination index	INDICA	SNP-2.1367412.	2	1367413	0.000216998
Germination index	INDICA	SNP-2.5097800.	2	5097804	0.00076757
Germination index	INDICA	SNP-2.5572323.	2	5572324	0.000814242
Germination index	INDICA	SNP-2.6557581.	2	6557582	7.20524e-05
Germination index	INDICA	SNP-2.6557818.	2	6557819	0.000125085
Germination index	INDICA	SNP-2.6561727.	2	6561728	0.000229105
Germination index	INDICA	SNP-2.6561743.	2	6561744	0.000488
Germination index	INDICA	SNP-2.8710927.	2	8710929	0.000387606
Germination index	INDICA	SNP-2.8800365.	2	8800368	0.000986078
Germination index	INDICA	SNP-2.8848256.	2	8848259	0.000736777
Germination index	INDICA	SNP-2.8885555.	2	8885558	0.000640207
Germination index	INDICA	SNP-2.11387948.	2	11387953	0.000310372
Germination index	INDICA	SNP-2.12875956.	2	12875961	0.000479863
Germination index	INDICA	SNP-2.14118060.	2	14123931	0.000664035
Germination index	INDICA	SNP-2.15095614.	2	15101485	0.000807203
Germination index	INDICA	SNP-2.17408805.	2	17414676	0.000963783
Germination index	INDICA	SNP-2.21599517.	2	21605387	0.000107008
Germination index	INDICA	SNP-2.21805109.	2	21810979	0.000448951
Germination index	INDICA	SNP-2.21824209.	2	21830079	0.000310474
Germination index	INDICA	SNP-2.21832814.	2	21838684	0.000171454
Germination index	INDICA	SNP-2.21833312.	2	21839182	0.00024531
Germination index	INDICA	SNP-2.22014459.	2	22020329	0.000889464
Germination index	INDICA	SNP-2.22279253.	2	22285123	0.00054125
Germination index	INDICA	SNP-2.22745538.	2	22751408	0.000581154
Germination index	INDICA	SNP-2.22810806.	2	22816676	0.000637083
Germination index	INDICA	SNP-2.23418585.	2	23424455	0.000160852
Germination index	INDICA	SNP-2.24461736.	2	24467606	0.000517184
Germination index	INDICA	SNP-2.26742855.	2	26748725	0.000205805
Germination index	INDICA	SNP-2.27494838.	2	27500708	0.000844371
Germination index	INDICA	SNP-2.28627428.	2	28633298	0.000907404
Germination index	INDICA	SNP-2.29507256.	2	29513126	0.00025107
Germination index	INDICA	SNP-2.32673225.	2	32679095	0.000688639
Germination index	INDICA	SNP-2.34443466.	2	34449336	0.000972146
Germination index	INDICA	SNP-2.34548479.	2	34554349	0.000526156
Germination index	INDICA	SNP-3.2311295.	3	2312300	0.00090036
Germination index	INDICA	SNP-3.6458420.	3	6459421	0.000798933
Germination index	INDICA	SNP-3.6540650.	3	6541651	0.000718959
Germination index	INDICA	SNP-3.11022373.	3	11023656	4.44748e-06
Germination index	INDICA	SNP-3.11368943.	3	11370226	0.000612213
Germination index	INDICA	SNP-3.13838786.	3	13840070	0.000174467
Germination index	INDICA	SNP-3.17314420.	3	17315611	0.000710605
Germination index	INDICA	SNP-3.17740124.	3	17741343	0.000768688
Germination index	INDICA	SNP-3.20471644.	3	20473134	0.000176384
Germination index	INDICA	SNP-3.21884452.	3	21885943	0.000718457
Germination index	INDICA	SNP-3.24964679.	3	24966600	0.000156067
Germination index	INDICA	SNP-3.31768899.	3	31776023	0.000877675
Germination index	INDICA	SNP-3.32835863.	3	32842994	0.000776185
Germination index	INDICA	SNP-3.34314357.	3	34321488	0.000219686
Germination index	INDICA	SNP-4.1498435.	4	1502886	0.000835147
Germination index	INDICA	SNP-4.9859131.	4	9868434	0.000761145
Germination index	INDICA	SNP-4.10463098.	4	10472400	0.000147035
Germination index	INDICA	SNP-4.11450358.	4	11459657	0.000927058
Germination index	INDICA	SNP-4.16804125.	4	16976084	0.000225627
Germination index	INDICA	SNP-4.21679058.	4	21851009	0.000938443
Germination index	INDICA	SNP-4.27028957.	4	27214088	0.000353561
Germination index	INDICA	SNP-4.27056619.	4	27241751	0.00080169
Germination index	INDICA	SNP-4.27077284.	4	27262416	0.0002376
Germination index	INDICA	SNP-4.27078063.	4	27263195	0.00080169
Germination index	INDICA	SNP-4.27079657.	4	27264789	0.00096036
Germination index	INDICA	SNP-4.27100259.	4	27285391	0.00061475
Germination index	INDICA	SNP-4.27101506.	4	27286638	0.000484442
Germination index	INDICA	SNP-4.27102493.	4	27287625	0.000498484
Germination index	INDICA	SNP-4.27102623.	4	27287755	0.000943291
Germination index	INDICA	SNP-4.27104454.	4	27289586	0.000207633
Germination index	INDICA	SNP-4.27108696.	4	27293828	0.000838584
Germination index	INDICA	SNP-4.27110908.	4	27296041	0.000803418
Germination index	INDICA	SNP-4.27111937.	4	27297070	0.0007978
Germination index	INDICA	SNP-4.27113395.	4	27298528	0.0008857
Germination index	INDICA	SNP-4.27116102.	4	27301235	0.000876861
Germination index	INDICA	SNP-4.27116414.	4	27301547	0.000831738
Germination index	INDICA	SNP-4.27130623.	4	27315756	0.000555249
Germination index	INDICA	SNP-4.27131110.	4	27316243	0.000139676
Germination index	INDICA	SNP-4.27131308.	4	27316441	0.000365156
Germination index	INDICA	SNP-4.27132822.	4	27317955	0.000883347
Germination index	INDICA	SNP-4.27137089.	4	27322222	0.000472586
Germination index	INDICA	SNP-4.27139075.	4	27324208	0.000669885
Germination index	INDICA	SNP-4.27141356.	4	27326489	0.000419346
Germination index	INDICA	SNP-4.27166456.	4	27351591	0.000170169
Germination index	INDICA	SNP-4.27172946.	4	27358082	0.000484927
Germination index	INDICA	SNP-4.27174249.	4	27359385	0.000774401
Germination index	INDICA	SNP-4.27179996.	4	27365133	0.000814729
Germination index	INDICA	SNP-4.27183164.	4	27368301	0.000806068
Germination index	INDICA	SNP-4.27186392.	4	27371529	0.000485816
Germination index	INDICA	SNP-4.27190424.	4	27375561	0.000822623
Germination index	INDICA	SNP-4.27193127.	4	27378264	0.000739685
Germination index	INDICA	SNP-4.27197696.	4	27382833	0.000721136
Germination index	INDICA	SNP-4.27209267.	4	27394404	0.000807008
Germination index	INDICA	SNP-4.27230871.	4	27416008	0.000755375
Germination index	INDICA	SNP-4.27237871.	4	27423008	0.000830209
Germination index	INDICA	SNP-4.27239782.	4	27424919	0.000819973
Germination index	INDICA	SNP-4.27564449.	4	27749587	0.000994231
Germination index	INDICA	SNP-4.27581184.	4	27766323	0.000865883
Germination index	INDICA	SNP-4.28597536.	4	28782687	0.000666594
Germination index	INDICA	SNP-4.33264214.	4	33449328	0.000671525
Germination index	INDICA	SNP-5.1137629.	5	1137646	0.000436168
Germination index	INDICA	SNP-5.8490785.	5	8490858	0.00081315
Germination index	INDICA	SNP-5.10078521.	5	10078593	6.14097e-05
Germination index	INDICA	SNP-5.17839398.	5	17899913	0.000187406
Germination index	INDICA	SNP-5.19479935.	5	19542452	0.000504566
Germination index	INDICA	SNP-5.19670661.	5	19733178	0.000499217
Germination index	INDICA	SNP-5.19713573.	5	19776090	0.000371413
Germination index	INDICA	SNP-5.19886884.	5	19949409	0.000506425
Germination index	INDICA	SNP-5.25341180.	5	25403760	0.000551219
Germination index	INDICA	SNP-5.25380963.	5	25443543	0.00044466
Germination index	INDICA	SNP-5.29766066.	5	29828712	0.000823294
Germination index	INDICA	SNP-6.998049.	6	999049	0.000714115
Germination index	INDICA	SNP-6.4166781.	6	4167781	0.000806657
Germination index	INDICA	SNP-6.4691136.	6	4692136	0.000385927
Germination index	INDICA	SNP-6.4696339.	6	4697339	0.000698296
Germination index	INDICA	SNP-6.5273870.	6	5274870	0.000109304
Germination index	INDICA	SNP-6.6198367.	6	6199367	0.000489675
Germination index	INDICA	SNP-6.6687977.	6	6688977	0.000526726
Germination index	INDICA	SNP-6.6776134.	6	6777134	0.000622496
Germination index	INDICA	SNP-6.6781863.	6	6782863	0.000973167
Germination index	INDICA	SNP-6.6936469.	6	6937469	0.000447818
Germination index	INDICA	SNP-6.8526296.	6	8527296	0.000802109
Germination index	INDICA	SNP-6.10633773.	6	10634773	0.000791792
Germination index	INDICA	SNP-6.11153703.	6	11154703	0.00099009
Germination index	INDICA	SNP-6.11155214.	6	11156214	0.000153087
Germination index	INDICA	SNP-6.11795204.	6	11796204	0.00079989
Germination index	INDICA	SNP-6.11869443.	6	11870443	0.000669955
Germination index	INDICA	SNP-6.11881272.	6	11882272	0.000843195
Germination index	INDICA	SNP-6.11888843.	6	11889843	0.000278257
Germination index	INDICA	SNP-6.11949537.	6	11950537	0.000768068
Germination index	INDICA	SNP-6.11996821.	6	11997821	0.000732676
Germination index	INDICA	SNP-6.12015973.	6	12016973	0.000160061
Germination index	INDICA	SNP-6.12721855.	6	12722855	4.00739e-05
Germination index	INDICA	SNP-6.13123492.	6	13124492	0.000650573
Germination index	INDICA	SNP-6.15637714.	6	15638713	0.000615346
Germination index	INDICA	SNP-6.20746839.	6	20747837	0.000951245
Germination index	INDICA	SNP-6.21074589.	6	21075587	0.000842644
Germination index	INDICA	SNP-6.21216414.	6	21217412	0.000111363
Germination index	INDICA	SNP-6.24480699.	6	24481697	0.000408272
Germination index	INDICA	SNP-6.24498331.	6	24499329	0.000294503
Germination index	INDICA	SNP-6.28317927.	6	28318926	0.000282808
Germination index	INDICA	SNP-7.7493770.	7	7494766	0.000602022
Germination index	INDICA	SNP-7.7889038.	7	7890034	0.000850234
Germination index	INDICA	SNP-7.8060038.	7	8061034	0.000937462
Germination index	INDICA	SNP-7.8974817.	7	8975812	0.000552899
Germination index	INDICA	SNP-7.8996725.	7	8997720	8.1832e-05
Germination index	INDICA	SNP-7.9214327.	7	9215322	0.000891598
Germination index	INDICA	SNP-7.11647275.	7	11648270	0.000473322
Germination index	INDICA	SNP-7.15874261.	7	15875255	0.000500164
Germination index	INDICA	SNP-7.17134671.	7	17135665	0.000945571
Germination index	INDICA	SNP-7.17342217.	7	17343211	0.000390046
Germination index	INDICA	SNP-7.17349645.	7	17350639	0.000699057
Germination index	INDICA	SNP-7.17352293.	7	17353287	0.000681998
Germination index	INDICA	SNP-7.18922767.	7	18923761	0.000952229
Germination index	INDICA	SNP-7.24812103.	7	24813098	0.000748804
Germination index	INDICA	SNP-7.28611968.	7	28612961	0.000776409
Germination index	INDICA	SNP-8.530320.	8	531321	0.000364017
Germination index	INDICA	SNP-8.1805391.	8	1806389	0.000812262
Germination index	INDICA	SNP-8.1991916.	8	1992914	0.000533514
Germination index	INDICA	SNP-8.4895908.	8	4896906	0.000982869
Germination index	INDICA	SNP-8.6346839.	8	6347835	0.00036412
Germination index	INDICA	SNP-8.10271696.	8	10272693	0.000623115
Germination index	INDICA	SNP-8.13686210.	8	13688925	6.54529e-05
Germination index	INDICA	SNP-8.14941180.	8	14943895	0.000283865
Germination index	INDICA	SNP-8.16463199.	8	16465914	0.00069971
Germination index	INDICA	SNP-8.17355975.	8	17358690	0.000379363
Germination index	INDICA	SNP-8.19387917.	8	19390631	0.000613351
Germination index	INDICA	SNP-8.23542475.	8	23545190	0.000631485
Germination index	INDICA	SNP-8.26345533.	8	26348248	0.00057846
Germination index	INDICA	SNP-8.27601253.	8	27603968	0.000529849
Germination index	INDICA	SNP-8.27700944.	8	27703659	9.58804e-05
Germination index	INDICA	SNP-9.2635826.	9	2636827	0.000358214
Germination index	INDICA	SNP-9.2922937.	9	2923938	0.000341691
Germination index	INDICA	SNP-9.5594260.	9	5595261	0.000791238
Germination index	INDICA	SNP-9.6671996.	9	6672997	0.000191124
Germination index	INDICA	SNP-9.8279023.	9	8280024	0.00071544
Germination index	INDICA	SNP-9.10759202.	9	10760204	0.0009982
Germination index	INDICA	SNP-9.10790543.	9	10791545	0.000771545
Germination index	INDICA	SNP-9.10805133.	9	10806135	4.68679e-05
Germination index	INDICA	SNP-9.10806171.	9	10807173	0.000116966
Germination index	INDICA	SNP-9.10826476.	9	10827478	0.000901607
Germination index	INDICA	SNP-9.10836458.	9	10837460	0.000797678
Germination index	INDICA	SNP-9.10910835.	9	10911837	0.000789344
Germination index	INDICA	SNP-9.12581051.	9	12582053	0.000830585
Germination index	INDICA	SNP-9.14050766.	9	14051768	0.000915433
Germination index	INDICA	SNP-9.18983828.	9	18984829	0.000530499
Germination index	INDICA	SNP-9.19751798.	9	19752280	0.000608193
Germination index	INDICA	SNP-9.19763534.	9	19764016	0.000882449
Germination index	INDICA	SNP-9.19765483.	9	19765965	0.000761253
Germination index	INDICA	SNP-9.21886027.	9	21886509	0.000640538
Germination index	INDICA	SNP-9.22973566.	9	22974048	0.000284758
Germination index	INDICA	SNP-10.175001.	10	176002	0.000927965
Germination index	INDICA	SNP-10.346132.	10	347133	0.000322738
Germination index	INDICA	SNP-10.1402489.	10	1403513	0.000155147
Germination index	INDICA	SNP-10.1793259.	10	1794283	0.000560083
Germination index	INDICA	SNP-10.1793384.	10	1794408	0.000542176
Germination index	INDICA	SNP-10.2181408.	10	2182432	0.000454702
Germination index	INDICA	SNP-10.2825120.	10	2826144	0.000751676
Germination index	INDICA	SNP-10.7584649.	10	7569038	0.000730436
Germination index	INDICA	SNP-10.11010737.	10	11081918	0.000772309
Germination index	INDICA	SNP-10.12749755.	10	12820941	0.000870435
Germination index	INDICA	SNP-10.13120347.	10	13191578	0.000945658
Germination index	INDICA	SNP-10.14000738.	10	14071973	0.000711455
Germination index	INDICA	SNP-10.17358957.	10	17430185	0.000355799
Germination index	INDICA	SNP-10.20808108.	10	20879630	0.000310501
Germination index	INDICA	SNP-10.22187285.	10	22258812	0.000709067
Germination index	INDICA	SNP-10.22189326.	10	22260853	0.000990525
Germination index	INDICA	SNP-10.22227067.	10	22298594	7.71436e-06
Germination index	INDICA	SNP-11.2503996.	11	2508093	0.000792488
Germination index	INDICA	SNP-11.3531112.	11	3535210	0.000915597
Germination index	INDICA	SNP-11.4157480.	11	4161579	0.000773544
Germination index	INDICA	SNP-11.6374503.	11	6378752	0.000257473
Germination index	INDICA	SNP-11.8265526.	11	8270917	0.00071383
Germination index	INDICA	SNP-11.9323320.	11	9328744	0.000801176
Germination index	INDICA	SNP-11.9376694.	11	9382118	2.83433e-05
Germination index	INDICA	SNP-11.12524645.	11	12988325	0.00037235
Germination index	INDICA	SNP-11.12805968.	11	13269648	0.000322073
Germination index	INDICA	SNP-11.13641164.	11	14104844	0.000747318
Germination index	INDICA	SNP-11.13812311.	11	14275991	2.19442e-05
Germination index	INDICA	SNP-11.15049855.	11	15513543	0.000477803
Germination index	INDICA	SNP-11.15157163.	11	15620852	0.000453515
Germination index	INDICA	SNP-11.15278975.	11	15742667	0.000995155
Germination index	INDICA	SNP-11.15770974.	11	16236105	0.000499081
Germination index	INDICA	SNP-11.15982681.	11	16447805	0.000501136
Germination index	INDICA	SNP-11.16103273.	11	16568396	0.000721066
Germination index	INDICA	SNP-11.16837473.	11	17303622	0.000367235
Germination index	INDICA	SNP-11.16882172.	11	17348321	0.000609212
Germination index	INDICA	SNP-11.16938891.	11	17405039	0.000145079
Germination index	INDICA	SNP-11.16938941.	11	17405089	0.000476789
Germination index	INDICA	SNP-11.16947218.	11	17413365	6.05541e-05
Germination index	INDICA	SNP-11.16948116.	11	17414263	0.000324925
Germination index	INDICA	SNP-11.16959250.	11	17425397	0.000735498
Germination index	INDICA	SNP-11.17234217.	11	17700362	0.000372377
Germination index	INDICA	SNP-11.17415952.	11	17882096	4.71094e-05
Germination index	INDICA	SNP-11.17602228.	11	18068371	0.000328833
Germination index	INDICA	SNP-11.18950118.	11	19416431	0.000971128
Germination index	INDICA	SNP-11.22647177.	11	23113307	6.03698e-05
Germination index	INDICA	SNP-12.2125961.	12	2126964	0.000299449
Germination index	INDICA	SNP-12.2383712.	12	2384712	0.000951119
Germination index	INDICA	SNP-12.2808400.	12	2809399	0.000814804
Germination index	INDICA	SNP-12.4098755.	12	4099768	0.000984047
Germination index	INDICA	SNP-12.4740623.	12	4741639	0.000432583
Germination index	INDICA	SNP-12.4911723.	12	4912739	7.75865e-05
Germination index	INDICA	SNP-12.5267719.	12	5268734	0.000368167
Germination index	INDICA	SNP-12.6418814.	12	6419925	0.00058627
Germination index	INDICA	SNP-12.12889941.	12	12892603	0.000640354
Germination index	INDICA	SNP-12.14300641.	12	14303302	0.000921493
Germination index	INDICA	SNP-12.17478955.	12	17485001	0.000930401
Germination index	INDICA	SNP-12.21556321.	12	21589775	0.000890075
Germination index	INDICA	SNP-12.26165691.	12	26199298	0.000649222
Germination index	INDICA	SNP-12.26219244.	12	26252851	0.000992253
Germination index	INDICA	SNP-12.26281091.	12	26314698	0.000212393
Germination index	INDICA	SNP-12.26285068.	12	26318675	0.000972842
Germination index	INDICA	SNP-12.26299712.	12	26333319	0.000397061
Germination index	INDICA	SNP-12.26306228.	12	26339835	0.000759665
Germination index	INDICA	SNP-12.26320241.	12	26353848	0.000193048
Germination index	INDICA	SNP-12.26332538.	12	26366145	5.20045e-05
Germination index	INDICA	SNP-12.26354123.	12	26387730	0.000224371
Germination index	INDICA	SNP-12.26372244.	12	26405851	0.000337136
Germination index	INDICA	SNP-12.26390490.	12	26424097	0.000153537
Germination index	INDICA	SNP-12.26392450.	12	26426057	6.15201e-05
Germination index	INDICA	SNP-12.26423508.	12	26457115	0.000628444
Germination index	INDICA	SNP-12.26455781.	12	26489388	0.000624787
Germination index	INDICA	SNP-12.26954503.	12	26988105	0.000245991
Germination index	INDICA	SNP-12.26955166.	12	26988768	0.000420479
Germination index	INDICA	SNP-12.27161952.	12	27195553	0.00047513
Germination index	INDICA	SNP-12.27174211.	12	27207812	0.000420479
Germination index	INDICA	SNP-12.27186249.	12	27219850	0.000420479
Germination index	INDICA	SNP-12.27207360.	12	27240961	0.000420479
Germination index	INDICA	SNP-12.27229671.	12	27263272	0.000463524
Germination index	INDICA	SNP-12.27247681.	12	27281282	0.000420479

## Sheet: JAPONICA
Trait	Subpopulation group	SNP-Name	Chromo-some	SNP position (bp)	p-value
Germination index	JAPONICA	SNP-1.2783807.	1	2784808	0.000934002
Germination index	JAPONICA	SNP-1.3711263.	1	3712264	0.000963104
Germination index	JAPONICA	SNP-1.3765563.	1	3766564	0.00035679
Germination index	JAPONICA	SNP-1.3778146.	1	3779147	0.000408468
Germination index	JAPONICA	SNP-1.3788360.	1	3789361	0.000765176
Germination index	JAPONICA	SNP-1.3855942.	1	3856943	0.000355002
Germination index	JAPONICA	SNP-1.3942031.	1	3943032	0.000929371
Germination index	JAPONICA	SNP-1.3994441.	1	3995442	0.000661177
Germination index	JAPONICA	SNP-1.4152785.	1	4153786	0.00017811
Germination index	JAPONICA	SNP-1.4169724.	1	4170725	0.000397475
Germination index	JAPONICA	SNP-1.4182936.	1	4183937	0.000641995
Germination index	JAPONICA	SNP-1.11337287.	1	11338312	0.000661267
Germination index	JAPONICA	SNP-1.11880386.	1	11881413	0.000263627
Germination index	JAPONICA	SNP-1.21674256.	1	21675302	0.000628314
Germination index	JAPONICA	SNP-1.22445721.	1	22446767	0.000718559
Germination index	JAPONICA	SNP-1.22459214.	1	22460260	0.000718559
Germination index	JAPONICA	SNP-1.22891724.	1	22892769	0.000302748
Germination index	JAPONICA	SNP-1.22897829.	1	22898874	0.000935123
Germination index	JAPONICA	SNP-1.22916777.	1	22917822	5.12639e-05
Germination index	JAPONICA	SNP-1.26034234.	1	26035279	0.000779568
Germination index	JAPONICA	SNP-1.26220367.	1	26221412	0.00068807
Germination index	JAPONICA	SNP-1.26315541.	1	26316586	0.000896879
Germination index	JAPONICA	SNP-1.26363035.	1	26364080	0.000682507
Germination index	JAPONICA	SNP-1.27059725.	1	27060770	0.000465939
Germination index	JAPONICA	SNP-1.27097746.	1	27098791	0.000853066
Germination index	JAPONICA	SNP-1.27168515.	1	27169560	0.000979235
Germination index	JAPONICA	SNP-1.34610965.	1	34612009	0.000286868
Germination index	JAPONICA	SNP-1.34812316.	1	34813360	0.000515835
Germination index	JAPONICA	SNP-1.41773071.	1	41774115	7.87814e-05
Germination index	JAPONICA	SNP-1.41811332.	1	41812376	0.000701858
Germination index	JAPONICA	SNP-1.42950022.	1	42951067	0.00035871
Germination index	JAPONICA	SNP-1.43038349.	1	43039394	0.000373753
Germination index	JAPONICA	SNP-1.43117484.	1	43118529	0.000473625
Germination index	JAPONICA	SNP-1.43127457.	1	43128502	0.000228874
Germination index	JAPONICA	SNP-1.43201129.	1	43202174	0.000263347
Germination index	JAPONICA	SNP-1.43222801.	1	43223846	0.000529518
Germination index	JAPONICA	SNP-2.6907139.	2	6907140	0.000501379
Germination index	JAPONICA	SNP-2.9472735.	2	9472738	0.000912545
Germination index	JAPONICA	SNP-2.17372703.	2	17378574	0.000181315
Germination index	JAPONICA	SNP-2.19397136.	2	19403005	0.00025036
Germination index	JAPONICA	SNP-2.20060954.	2	20066823	0.000435332
Germination index	JAPONICA	SNP-2.21153449.	2	21159318	0.000189157
Germination index	JAPONICA	SNP-2.21767099.	2	21772969	0.000197927
Germination index	JAPONICA	SNP-2.21769722.	2	21775592	0.00029046
Germination index	JAPONICA	SNP-2.21791700.	2	21797570	6.69734e-05
Germination index	JAPONICA	SNP-2.21792093.	2	21797963	0.00011553
Germination index	JAPONICA	SNP-2.21802297.	2	21808167	0.000149189
Germination index	JAPONICA	SNP-2.23600430.	2	23606300	0.000153966
Germination index	JAPONICA	SNP-2.24245752.	2	24251622	0.000659641
Germination index	JAPONICA	SNP-2.24247171.	2	24253041	0.00058713
Germination index	JAPONICA	SNP-2.30327584.	2	30333454	0.000692061
Germination index	JAPONICA	SNP-3.5805944.	3	5806945	0.0003281
Germination index	JAPONICA	SNP-3.6231372.	3	6232373	0.000379184
Germination index	JAPONICA	SNP-3.9475917.	3	9476982	0.000792969
Germination index	JAPONICA	SNP-3.10595107.	3	10596192	0.000190574
Germination index	JAPONICA	SNP-3.10600858.	3	10601943	6.32559e-05
Germination index	JAPONICA	SNP-4.865415.	4	866416	0.000245827
Germination index	JAPONICA	SNP-4.896424.	4	897425	0.000738449
Germination index	JAPONICA	SNP-4.1074973.	4	1079423	0.000434901
Germination index	JAPONICA	SNP-4.1087516.	4	1091967	0.000680901
Germination index	JAPONICA	SNP-4.1099484.	4	1103935	0.000637455
Germination index	JAPONICA	SNP-4.1105928.	4	1110379	0.000445654
Germination index	JAPONICA	SNP-4.1112236.	4	1116687	0.000562929
Germination index	JAPONICA	SNP-4.15029298.	4	15038584	0.000979999
Germination index	JAPONICA	SNP-4.26809278.	4	26994407	0.000267696
Germination index	JAPONICA	SNP-4.31251360.	4	31436463	0.000171111
Germination index	JAPONICA	SNP-4.31282885.	4	31467988	0.000876896
Germination index	JAPONICA	SNP-4.31291750.	4	31476853	0.000706384
Germination index	JAPONICA	SNP-4.31297244.	4	31482347	0.000898497
Germination index	JAPONICA	SNP-4.31337565.	4	31522667	0.000420234
Germination index	JAPONICA	SNP-4.31693230.	4	31878336	0.000189792
Germination index	JAPONICA	SNP-4.34304681.	4	34489789	0.000310201
Germination index	JAPONICA	SNP-5.412677.	5	412678	0.00098315
Germination index	JAPONICA	SNP-5.706371.	5	706372	0.00063418
Germination index	JAPONICA	SNP-5.6943184.	5	6943243	0.000561996
Germination index	JAPONICA	SNP-5.6975897.	5	6975956	0.00060043
Germination index	JAPONICA	SNP-5.7020260.	5	7020319	7.39354e-05
Germination index	JAPONICA	SNP-5.7027850.	5	7027909	5.63417e-05
Germination index	JAPONICA	SNP-5.8817778.	5	8817851	0.00059389
Germination index	JAPONICA	SNP-5.13820309.	5	13877766	0.000337798
Germination index	JAPONICA	SNP-5.21586838.	5	21649397	0.000376694
Germination index	JAPONICA	SNP-5.24455479.	5	24518059	0.000344679
Germination index	JAPONICA	SNP-5.27878346.	5	27940991	0.000620168
Germination index	JAPONICA	SNP-5.29474009.	5	29536655	0.000625639
Germination index	JAPONICA	SNP-5.29474758.	5	29537404	0.00020425
Germination index	JAPONICA	SNP-6.5892203.	6	5893203	0.00032854
Germination index	JAPONICA	SNP-6.5922088.	6	5923088	0.000555546
Germination index	JAPONICA	SNP-6.6013941.	6	6014941	0.000820794
Germination index	JAPONICA	SNP-6.6141403.	6	6142403	0.000829124
Germination index	JAPONICA	SNP-6.6142823.	6	6143823	0.000950576
Germination index	JAPONICA	SNP-6.16524491.	6	16525490	7.01777e-05
Germination index	JAPONICA	SNP-7.7945736.	7	7946732	0.000645774
Germination index	JAPONICA	SNP-7.18153137.	7	18154131	0.000389961
Germination index	JAPONICA	SNP-7.18214594.	7	18215588	0.000679109
Germination index	JAPONICA	SNP-7.19090165.	7	19091159	6.93457e-05
Germination index	JAPONICA	SNP-7.19586939.	7	19587933	0.0009809
Germination index	JAPONICA	SNP-7.19632652.	7	19633646	0.000851305
Germination index	JAPONICA	SNP-7.19771383.	7	19772377	0.0007314
Germination index	JAPONICA	SNP-7.19780146.	7	19781140	0.000624713
Germination index	JAPONICA	SNP-7.19783940.	7	19784934	0.000382811
Germination index	JAPONICA	SNP-7.19784453.	7	19785447	0.000542043
Germination index	JAPONICA	SNP-7.19884718.	7	19885712	0.000186205
Germination index	JAPONICA	SNP-7.19893904.	7	19894898	0.000846284
Germination index	JAPONICA	SNP-7.19939309.	7	19940303	0.000701425
Germination index	JAPONICA	SNP-7.19939562.	7	19940556	0.000701425
Germination index	JAPONICA	SNP-7.19999808.	7	20000802	8.39137e-05
Germination index	JAPONICA	SNP-7.20008228.	7	20009222	0.00012478
Germination index	JAPONICA	SNP-7.20049921.	7	20050915	0.000213989
Germination index	JAPONICA	SNP-7.20051678.	7	20052672	0.000746589
Germination index	JAPONICA	SNP-7.20064545.	7	20065539	0.000185035
Germination index	JAPONICA	SNP-7.20065325.	7	20066319	4.44861e-05
Germination index	JAPONICA	SNP-7.20079290.	7	20080284	0.000442725
Germination index	JAPONICA	SNP-7.20079377.	7	20080371	0.000490953
Germination index	JAPONICA	SNP-7.20080638.	7	20081632	6.83161e-05
Germination index	JAPONICA	SNP-7.20081046.	7	20082040	0.000401961
Germination index	JAPONICA	SNP-7.20083539.	7	20084533	0.000747159
Germination index	JAPONICA	SNP-7.20103658.	7	20104652	1.75997e-05
Germination index	JAPONICA	SNP-7.20110419.	7	20111413	0.000895596
Germination index	JAPONICA	SNP-7.20122400.	7	20123394	8.22384e-05
Germination index	JAPONICA	SNP-7.20129615.	7	20130609	0.000129477
Germination index	JAPONICA	SNP-7.20132717.	7	20133711	2.45103e-05
Germination index	JAPONICA	SNP-7.20133264.	7	20134258	0.000144695
Germination index	JAPONICA	SNP-7.20170378.	7	20171372	0.000284679
Germination index	JAPONICA	SNP-7.20258778.	7	20259772	0.000680775
Germination index	JAPONICA	SNP-7.20261326.	7	20262320	0.000348598
Germination index	JAPONICA	SNP-7.22502964.	7	22503958	0.000370887
Germination index	JAPONICA	SNP-7.26492040.	7	26493035	0.00077613
Germination index	JAPONICA	SNP-8.2546014.	8	2547012	0.000972759
Germination index	JAPONICA	SNP-8.3150670.	8	3151668	0.000569935
Germination index	JAPONICA	SNP-8.3152597.	8	3153595	0.000715859
Germination index	JAPONICA	SNP-8.3152894.	8	3153892	0.000787381
Germination index	JAPONICA	SNP-8.5115027.	8	5116025	0.000546483
Germination index	JAPONICA	SNP-8.5279797.	8	5280795	0.000891118
Germination index	JAPONICA	SNP-8.6144022.	8	6145018	2.29572e-06
Germination index	JAPONICA	SNP-8.9331476.	8	9332473	0.000647922
Germination index	JAPONICA	SNP-8.9621564.	8	9622561	0.000948731
Germination index	JAPONICA	SNP-8.10106930.	8	10107927	2.85869e-05
Germination index	JAPONICA	SNP-8.10503711.	8	10504708	0.000996836
Germination index	JAPONICA	SNP-8.10989103.	8	10990099	0.000522389
Germination index	JAPONICA	SNP-8.12269949.	8	12270945	8.84865e-05
Germination index	JAPONICA	SNP-8.12303634.	8	12304630	0.000589136
Germination index	JAPONICA	SNP-8.12306893.	8	12307889	0.000657661
Germination index	JAPONICA	SNP-8.12312482.	8	12313478	0.000866563
Germination index	JAPONICA	SNP-8.12344915.	8	12345911	0.000758702
Germination index	JAPONICA	SNP-8.13354461.	8	13356907	0.000832976
Germination index	JAPONICA	SNP-8.26824786.	8	26827501	0.000270121
Germination index	JAPONICA	SNP-9.2406929.	9	2407930	0.000977956
Germination index	JAPONICA	SNP-9.3561206.	9	3562207	0.000664705
Germination index	JAPONICA	SNP-9.3869634.	9	3870635	0.000885616
Germination index	JAPONICA	SNP-9.8906659.	9	8907661	0.000653614
Germination index	JAPONICA	SNP-9.12900938.	9	12901940	0.000264467
Germination index	JAPONICA	SNP-9.12943870.	9	12944872	6.7467e-05
Germination index	JAPONICA	SNP-9.15932501.	9	15933503	4.92808e-05
Germination index	JAPONICA	SNP-9.15966721.	9	15967723	0.000239919
Germination index	JAPONICA	SNP-9.17133679.	9	17134681	6.01234e-05
Germination index	JAPONICA	SNP-9.17144598.	9	17145600	0.000277701
Germination index	JAPONICA	SNP-10.2079546.	10	2080570	0.000488803
Germination index	JAPONICA	SNP-10.4499324.	10	4482787	0.000922339
Germination index	JAPONICA	SNP-10.6724603.	10	6708981	0.000743113
Germination index	JAPONICA	SNP-10.7441635.	10	7426013	0.000692207
Germination index	JAPONICA	SNP-10.8128889.	10	8200028	0.000563972
Germination index	JAPONICA	SNP-10.10186190.	10	10257370	0.000663795
Germination index	JAPONICA	SNP-10.10615158.	10	10686338	0.000747369
Germination index	JAPONICA	SNP-10.14114177.	10	14185412	0.000277812
Germination index	JAPONICA	SNP-10.14251846.	10	14323081	0.000506657
Germination index	JAPONICA	SNP-10.14351122.	10	14422357	0.000330862
Germination index	JAPONICA	SNP-10.15896981.	10	15968211	0.000965427
Germination index	JAPONICA	SNP-10.15912968.	10	15984197	0.000647119
Germination index	JAPONICA	SNP-10.17381015.	10	17452243	0.00086334
Germination index	JAPONICA	SNP-10.18120535.	10	18191977	0.000979328
Germination index	JAPONICA	SNP-10.19227113.	10	19298559	0.000540589
Germination index	JAPONICA	SNP-10.23025349.	10	23096877	0.000623738
Germination index	JAPONICA	SNP-11.5754108.	11	5758357	0.000902366
Germination index	JAPONICA	SNP-11.6466939.	11	6471188	0.000148809
Germination index	JAPONICA	SNP-11.12587726.	11	13051406	0.000510708
Germination index	JAPONICA	SNP-11.15123221.	11	15586910	0.000839465
Germination index	JAPONICA	SNP-11.15463196.	11	15928327	0.000592037
Germination index	JAPONICA	SNP-11.15765353ga.	11	16230484	0.000137324
Germination index	JAPONICA	SNP-11.15783051.	11	16248182	0.000554843
Germination index	JAPONICA	SNP-11.15783139.	11	16248270	0.000665529
Germination index	JAPONICA	SNP-11.15783195.	11	16248326	0.000256355
Germination index	JAPONICA	SNP-11.15783326.	11	16248457	2.41088e-05
Germination index	JAPONICA	SNP-11.15783342.	11	16248473	6.36873e-05
Germination index	JAPONICA	SNP-11.18924668.	11	19390981	8.94056e-05
Germination index	JAPONICA	SNP-11.19210542.	11	19676855	0.000101165
Germination index	JAPONICA	SNP-11.19241580.	11	19707893	0.000738431
Germination index	JAPONICA	SNP-11.19244444.	11	19710757	0.000854442
Germination index	JAPONICA	SNP-11.19250974.	11	19717287	0.000203021
Germination index	JAPONICA	SNP-11.19252004.	11	19718317	7.77637e-05
Germination index	JAPONICA	SNP-11.19252026.	11	19718339	0.000668603
Germination index	JAPONICA	SNP-11.19279945.	11	19746258	0.000770032
Germination index	JAPONICA	SNP-11.19290754.	11	19757067	0.000100291
Germination index	JAPONICA	SNP-11.19295925.	11	19762238	0.000295568
Germination index	JAPONICA	SNP-11.19302799.	11	19769112	0.000589504
Germination index	JAPONICA	SNP-11.19303784.	11	19770097	0.000885189
Germination index	JAPONICA	SNP-12.1873656.	12	1874660	0.00040994
Germination index	JAPONICA	SNP-12.4452100.	12	4453113	0.000942034
Germination index	JAPONICA	SNP-12.5337410.	12	5338425	0.000835876
Germination index	JAPONICA	SNP-12.7770789.	12	7773384	0.000529207
Germination index	JAPONICA	SNP-12.14004222.	12	14006883	0.000710274
Germination index	JAPONICA	SNP-12.24862695.	12	24896242	0.000636993
Germination index	JAPONICA	SNP-12.24866135.	12	24899682	0.000676409
Germination index	JAPONICA	SNP-12.24870518.	12	24904065	0.00035276
Germination index	JAPONICA	SNP-12.24995770.	12	25029318	0.000895279

## Sheet: TemperateJaponica
Trait	Subpopulation group	SNP-Name	Chromo-some	SNP position (bp)	p-value
Germination index	temperate japonica	SNP-1.408706.	1	409707	0.000567516
Germination index	temperate japonica	SNP-1.2201525.	1	2202526	0.000337262
Germination index	temperate japonica	SNP-1.3853633.	1	3854634	0.000433612
Germination index	temperate japonica	SNP-1.11012329.	1	11013354	0.000136083
Germination index	temperate japonica	SNP-1.11134355.	1	11135380	0.00085359
Germination index	temperate japonica	SNP-1.12709127.	1	12710154	0.000539217
Germination index	temperate japonica	SNP-1.12713105.	1	12714132	0.000469462
Germination index	temperate japonica	SNP-1.12724087.	1	12725114	0.000672389
Germination index	temperate japonica	SNP-1.22898999.	1	22900044	2.36381e-05
Germination index	temperate japonica	SNP-1.22899566.	1	22900611	0.000476693
Germination index	temperate japonica	SNP-1.26034234.	1	26035279	0.000514541
Germination index	temperate japonica	SNP-1.29743929.	1	29744975	3.91706e-06
Germination index	temperate japonica	SNP-1.31264097.	1	31265142	0.000684824
Germination index	temperate japonica	SNP-1.41749391.	1	41750435	8.36154e-06
Germination index	temperate japonica	SNP-1.41750895.	1	41751939	4.46856e-05
Germination index	temperate japonica	SNP-1.41751315.	1	41752359	2.9427e-05
Germination index	temperate japonica	SNP-1.41756610.	1	41757654	7.06686e-06
Germination index	temperate japonica	SNP-1.41768226.	1	41769270	0.000246627
Germination index	temperate japonica	SNP-1.42380108.	1	42381153	0.000992
Germination index	temperate japonica	SNP-2.9765526.	2	9765529	0.000125425
Germination index	temperate japonica	SNP-2.16885388.	2	16891259	0.000678596
Germination index	temperate japonica	SNP-2.17182086.	2	17187957	0.000129803
Germination index	temperate japonica	SNP-2.17372703.	2	17378574	0.000613882
Germination index	temperate japonica	SNP-2.21767099.	2	21772969	0.000318492
Germination index	temperate japonica	SNP-2.21769722.	2	21775592	0.000475908
Germination index	temperate japonica	SNP-2.21778435.	2	21784305	0.00094628
Germination index	temperate japonica	SNP-2.21784765.	2	21790635	0.000180985
Germination index	temperate japonica	SNP-2.21784834.	2	21790704	0.000350122
Germination index	temperate japonica	SNP-2.21785101.	2	21790971	0.000645166
Germination index	temperate japonica	SNP-2.21791700.	2	21797570	0.000138714
Germination index	temperate japonica	SNP-2.21792093.	2	21797963	0.000201021
Germination index	temperate japonica	SNP-2.21801393.	2	21807263	0.000345685
Germination index	temperate japonica	SNP-2.21802297.	2	21808167	0.000166444
Germination index	temperate japonica	SNP-2.21805081.	2	21810951	0.00057927
Germination index	temperate japonica	SNP-2.21805111.	2	21810981	0.000981306
Germination index	temperate japonica	SNP-2.21806300.	2	21812170	0.000920802
Germination index	temperate japonica	SNP-2.24253117.	2	24258987	0.000139563
Germination index	temperate japonica	SNP-2.33629217.	2	33635087	0.000667799
Germination index	temperate japonica	SNP-3.643140.	3	644143	0.00063307
Germination index	temperate japonica	SNP-3.3645116.	3	3646121	0.000850427
Germination index	temperate japonica	SNP-3.22276679.	3	22278173	0.000862033
Germination index	temperate japonica	SNP-3.23963359.	3	23965186	0.000574015
Germination index	temperate japonica	SNP-3.25488555.	3	25490475	8.52384e-05
Germination index	temperate japonica	SNP-3.35330452.	3	35337584	0.000207739
Germination index	temperate japonica	SNP-4.331575.	4	332576	0.000538303
Germination index	temperate japonica	SNP-4.865415.	4	866416	0.000932816
Germination index	temperate japonica	SNP-4.893137.	4	894138	0.000495133
Germination index	temperate japonica	SNP-4.893358.	4	894359	7.95151e-05
Germination index	temperate japonica	SNP-4.1867559.	4	1871964	0.000272155
Germination index	temperate japonica	SNP-4.5492615.	4	5497175	2.55192e-05
Germination index	temperate japonica	SNP-4.5742025.	4	5746587	0.000887238
Germination index	temperate japonica	SNP-4.5814018.	4	5818580	0.000708951
Germination index	temperate japonica	SNP-4.12937690.	4	12946980	0.000435121
Germination index	temperate japonica	SNP-4.21601305.	4	21773256	0.000214878
Germination index	temperate japonica	SNP-4.24728267.	4	24913407	0.000875721
Germination index	temperate japonica	SNP-4.24841659.	4	25026799	0.000429597
Germination index	temperate japonica	SNP-4.26809278.	4	26994407	0.000437629
Germination index	temperate japonica	SNP-4.29050847.	4	29235991	0.000817243
Germination index	temperate japonica	SNP-4.31338283.	4	31523385	0.000437039
Germination index	temperate japonica	SNP-4.31339069.	4	31524171	0.000196799
Germination index	temperate japonica	SNP-4.31339212.	4	31524314	0.000518302
Germination index	temperate japonica	SNP-4.33004516at.	4	33189629	0.000655815
Germination index	temperate japonica	SNP-5.7020260.	5	7020319	0.000831533
Germination index	temperate japonica	SNP-6.6473711.	6	6474711	0.000235027
Germination index	temperate japonica	SNP-6.6519700.	6	6520700	0.000284121
Germination index	temperate japonica	SNP-6.9029569.	6	9030569	0.000835161
Germination index	temperate japonica	SNP-6.11846119.	6	11847119	0.000486516
Germination index	temperate japonica	SNP-6.12111006.	6	12112006	0.000186522
Germination index	temperate japonica	SNP-6.13326452.	6	13327452	0.000842994
Germination index	temperate japonica	SNP-6.29052126.	6	29053125	0.000327845
Germination index	temperate japonica	SNP-7.19090165.	7	19091159	6.11339e-05
Germination index	temperate japonica	SNP-7.25421696.	7	25422691	0.00061708
Germination index	temperate japonica	SNP-7.26228686.	7	26229681	0.000894164
Germination index	temperate japonica	SNP-8.2546014.	8	2547012	0.000363637
Germination index	temperate japonica	SNP-8.4137989.	8	4138987	0.000392971
Germination index	temperate japonica	SNP-8.6144022.	8	6145018	2.78924e-05
Germination index	temperate japonica	SNP-9.3561206.	9	3562207	0.000810779
Germination index	temperate japonica	SNP-9.6363960.	9	6364961	0.00083324
Germination index	temperate japonica	SNP-9.8906659.	9	8907661	0.000796584
Germination index	temperate japonica	SNP-9.12943870.	9	12944872	0.000844241
Germination index	temperate japonica	SNP-9.15932501.	9	15933503	0.000342828
Germination index	temperate japonica	SNP-9.17144075.	9	17145077	0.000492258
Germination index	temperate japonica	SNP-9.17144598.	9	17145600	0.000864861
Germination index	temperate japonica	SNP-9.18009739.	9	18010741	0.000845864
Germination index	temperate japonica	SNP-9.20265067.	9	20265549	0.000638999
Germination index	temperate japonica	SNP-10.7448118.	10	7432496	1.18106e-05
Germination index	temperate japonica	SNP-10.9061090.	10	9132230	6.48249e-05
Germination index	temperate japonica	SNP-10.13467331.	10	13538562	0.000398245
Germination index	temperate japonica	SNP-11.15609925.	11	16075054	0.000269728
Germination index	temperate japonica	SNP-11.15783051.	11	16248182	0.000758615
Germination index	temperate japonica	SNP-11.15783195.	11	16248326	0.000609841
Germination index	temperate japonica	SNP-11.15783326.	11	16248457	0.000185987
Germination index	temperate japonica	SNP-11.15783342.	11	16248473	0.000763987
Germination index	temperate japonica	SNP-11.16238462.	11	16703586	7.57501e-05
Germination index	temperate japonica	SNP-11.16248489.	11	16713613	0.000230458
Germination index	temperate japonica	SNP-11.18924668.	11	19390981	0.000173791
Germination index	temperate japonica	SNP-11.19209664.	11	19675977	0.000576161
Germination index	temperate japonica	SNP-11.19210542.	11	19676855	0.000495486
Germination index	temperate japonica	SNP-11.19244444.	11	19710757	0.000665329
Germination index	temperate japonica	SNP-11.19252004.	11	19718317	0.000464688
Germination index	temperate japonica	SNP-11.19252026.	11	19718339	0.000581484
Germination index	temperate japonica	SNP-11.19290754.	11	19757067	0.000212393
Germination index	temperate japonica	SNP-11.22562259.	11	23028389	0.000884436
Germination index	temperate japonica	SNP-11.23956617.	11	24422778	0.000416412
Germination index	temperate japonica	SNP-11.28097894.	11	28621116	0.000872621
Germination index	temperate japonica	SNP-12.9311880.	12	9314472	0.000741281
Germination index	temperate japonica	SNP-12.10619991.	12	10622579	0.000283381
Germination index	temperate japonica	SNP-12.13471409.	12	13474072	0.000396317
Germination index	temperate japonica	SNP-12.14004222.	12	14006883	0.000483837
Germination index	temperate japonica	SNP-12.22231296.	12	22264750	0.000701805
Germination index	temperate japonica	SNP-12.24994645.	12	25028193	0.000609489

## Sheet: TropicalJaponica
Trait	Subpopulation group	SNP-Name	Chromo-some	SNP position (bp)	p-value
Germination index	tropical japonica	SNP-1.1983462.	1	1984463	2.54634e-05
Germination index	tropical japonica	SNP-1.3013374.	1	3014375	4.8006e-06
Germination index	tropical japonica	SNP-1.3225258.	1	3226259	0.000599113
Germination index	tropical japonica	SNP-1.5884096.	1	5885097	0.000380832
Germination index	tropical japonica	SNP-1.11337287.	1	11338312	5.35416e-06
Germination index	tropical japonica	SNP-1.11684866.	1	11685893	0.000330178
Germination index	tropical japonica	SNP-1.11880386.	1	11881413	8.29085e-05
Germination index	tropical japonica	SNP-1.12069977.	1	12071004	0.000907795
Germination index	tropical japonica	SNP-1.15863654.	1	15864681	0.000165095
Germination index	tropical japonica	SNP-1.16286542.	1	16287569	0.000604637
Germination index	tropical japonica	SNP-1.17185431.	1	17186478	0.000511303
Germination index	tropical japonica	SNP-1.20217962.	1	20219008	0.000342275
Germination index	tropical japonica	SNP-1.21363542.	1	21364588	0.000699242
Germination index	tropical japonica	SNP-1.21467636.	1	21468682	0.000852724
Germination index	tropical japonica	SNP-1.21869088.	1	21870134	0.00092651
Germination index	tropical japonica	SNP-1.28267047.	1	28268092	0.00022942
Germination index	tropical japonica	SNP-1.28532626.	1	28533672	0.000637359
Germination index	tropical japonica	SNP-1.29965403.	1	29966449	0.000914881
Germination index	tropical japonica	SNP-1.32359575.	1	32360620	7.33763e-05
Germination index	tropical japonica	SNP-1.35048095.	1	35049139	2.06013e-05
Germination index	tropical japonica	SNP-1.40554203.	1	40555247	0.000532126
Germination index	tropical japonica	SNP-1.40563126.	1	40564170	0.000428982
Germination index	tropical japonica	SNP-2.247710.	2	247711	7.73136e-05
Germination index	tropical japonica	SNP-2.2177604.	2	2177605	0.000856284
Germination index	tropical japonica	SNP-2.4768905.	2	4768909	1.0935e-05
Germination index	tropical japonica	SNP-2.11348263.	2	11348268	0.000190054
Germination index	tropical japonica	SNP-2.11710883.	2	11710888	0.000947149
Germination index	tropical japonica	SNP-2.13258098.	2	13258103	0.000827454
Germination index	tropical japonica	SNP-2.13846455.	2	13852326	0.000178294
Germination index	tropical japonica	SNP-2.14661065.	2	14666936	0.000101121
Germination index	tropical japonica	SNP-2.15061788.	2	15067659	0.000359222
Germination index	tropical japonica	SNP-2.22676308.	2	22682178	0.000736863
Germination index	tropical japonica	SNP-2.26437087.	2	26442957	1.19947e-05
Germination index	tropical japonica	SNP-2.26808983.	2	26814853	0.000112003
Germination index	tropical japonica	SNP-2.32242196.	2	32248066	0.000232632
Germination index	tropical japonica	SNP-2.33871136.	2	33877006	0.000986353
Germination index	tropical japonica	SNP-2.34193494.	2	34199364	8.28762e-05
Germination index	tropical japonica	SNP-2.34678899.	2	34684769	0.00052465
Germination index	tropical japonica	SNP-2.34705148.	2	34711018	0.000779923
Germination index	tropical japonica	SNP-3.254233.	3	255234	0.000199107
Germination index	tropical japonica	SNP-3.6251947.	3	6252948	1.77417e-05
Germination index	tropical japonica	SNP-3.7795267.	3	7796330	0.000749071
Germination index	tropical japonica	SNP-3.10705849.	3	10706934	1.46683e-05
Germination index	tropical japonica	SNP-3.11125493.	3	11126776	0.00091951
Germination index	tropical japonica	SNP-3.11302285.	3	11303568	3.94912e-05
Germination index	tropical japonica	SNP-3.12678068.	3	12679351	0.000157713
Germination index	tropical japonica	SNP-3.13055808.	3	13057091	0.000436431
Germination index	tropical japonica	SNP-3.14273230.	3	14274542	0.000405269
Germination index	tropical japonica	SNP-3.15156255.	3	15157609	0.000116907
Germination index	tropical japonica	SNP-3.19108955.	3	19110196	0.000265105
Germination index	tropical japonica	SNP-3.20062306.	3	20063796	6.15957e-05
Germination index	tropical japonica	SNP-3.21313131.	3	21314622	0.000483706
Germination index	tropical japonica	SNP-3.21716445.	3	21717936	0.000451661
Germination index	tropical japonica	SNP-3.24319800.	3	24321722	0.000948183
Germination index	tropical japonica	SNP-3.25082829.	3	25084749	0.000644007
Germination index	tropical japonica	SNP-3.30496336.	3	30503448	0.000182761
Germination index	tropical japonica	SNP-3.35938897.	3	35946029	0.000524168
Germination index	tropical japonica	SNP-4.3606936.	4	3611335	2.6996e-05
Germination index	tropical japonica	SNP-4.7374764.	4	7379496	0.000737019
Germination index	tropical japonica	SNP-4.10490317.	4	10499619	0.000165453
Germination index	tropical japonica	SNP-4.10843136.	4	10852436	0.000650786
Germination index	tropical japonica	SNP-4.12036842.	4	12046132	0.000902237
Germination index	tropical japonica	SNP-4.19790726.	4	19962691	0.000199833
Germination index	tropical japonica	SNP-4.21874183.	4	22046133	0.00070676
Germination index	tropical japonica	SNP-4.22973722.	4	23158868	0.000140245
Germination index	tropical japonica	SNP-4.24542228.	4	24727368	2.35746e-06
Germination index	tropical japonica	SNP-4.26815185.	4	27000314	0.000185871
Germination index	tropical japonica	SNP-4.30296325.	4	30481448	0.000914931
Germination index	tropical japonica	SNP-4.31055391.	4	31240502	0.000111416
Germination index	tropical japonica	SNP-4.31993429.	4	32178537	3.34269e-05
Germination index	tropical japonica	SNP-4.33308691.	4	33493808	0.000300561
Germination index	tropical japonica	SNP-4.33334937.	4	33520053	0.000151331
Germination index	tropical japonica	SNP-5.340698.	5	340699	9.93107e-05
Germination index	tropical japonica	SNP-5.7140109.	5	7140168	0.000383824
Germination index	tropical japonica	SNP-5.11716590.	5	11716661	0.000721589
Germination index	tropical japonica	SNP-5.13278771.	5	13335850	0.000909533
Germination index	tropical japonica	SNP-5.14008072.	5	14065529	1.13929e-05
Germination index	tropical japonica	SNP-5.15069667.	5	15127126	1.9037e-05
Germination index	tropical japonica	SNP-5.20063486.	5	20126012	0.000366595
Germination index	tropical japonica	SNP-5.20337704.	5	20400233	1.05349e-05
Germination index	tropical japonica	SNP-5.21118854.	5	21181414	0.000314937
Germination index	tropical japonica	SNP-5.21373374.	5	21435934	0.000700093
Germination index	tropical japonica	SNP-5.21388788.	5	21451348	0.000168531
Germination index	tropical japonica	SNP-5.21421929.	5	21484489	3.55642e-05
Germination index	tropical japonica	SNP-5.21422903.	5	21485463	0.000375698
Germination index	tropical japonica	SNP-5.22238858.	5	22301418	0.000921099
Germination index	tropical japonica	SNP-5.23944118.	5	24006699	0.000390606
Germination index	tropical japonica	SNP-5.24592735.	5	24655316	7.23407e-05
Germination index	tropical japonica	SNP-5.25144010.	5	25206590	2.81911e-05
Germination index	tropical japonica	SNP-5.25374233.	5	25436813	0.000873353
Germination index	tropical japonica	SNP-5.26964185.	5	27026830	9.35174e-06
Germination index	tropical japonica	SNP-5.26969622.	5	27032267	0.000826904
Germination index	tropical japonica	SNP-5.27843939.	5	27906583	8.2776e-06
Germination index	tropical japonica	SNP-6.2229651.	6	2230651	0.000238707
Germination index	tropical japonica	SNP-6.2749394.	6	2750394	0.000438616
Germination index	tropical japonica	SNP-6.5924550.	6	5925550	0.000973647
Germination index	tropical japonica	SNP-6.6879843.	6	6880843	0.000289286
Germination index	tropical japonica	SNP-6.8263404.	6	8264404	0.000866693
Germination index	tropical japonica	SNP-6.10823616.	6	10824616	0.00050449
Germination index	tropical japonica	SNP-6.13145368.	6	13146368	3.86253e-05
Germination index	tropical japonica	SNP-6.14150281.	6	14151281	0.000385181
Germination index	tropical japonica	SNP-6.14401885.	6	14402885	0.000269772
Germination index	tropical japonica	SNP-6.15015049.	6	15016049	0.000997907
Germination index	tropical japonica	SNP-6.15085852.	6	15086852	0.000479497
Germination index	tropical japonica	SNP-6.16383107.	6	16384106	6.51863e-05
Germination index	tropical japonica	SNP-6.19650818.	6	19651816	0.000670203
Germination index	tropical japonica	SNP-6.20569651.	6	20570649	0.000511302
Germination index	tropical japonica	SNP-6.22676315.	6	22677313	4.3238e-05
Germination index	tropical japonica	SNP-6.24623501.	6	24624499	6.11456e-06
Germination index	tropical japonica	SNP-6.24847937.	6	24848935	1.66583e-05
Germination index	tropical japonica	SNP-6.25695101.	6	25696099	0.000785334
Germination index	tropical japonica	SNP-6.30048471.	6	30049470	0.000327165
Germination index	tropical japonica	SNP-6.31146707.	6	31147706	0.000343343
Germination index	tropical japonica	SNP-7.4753869.	7	4754869	7.85902e-05
Germination index	tropical japonica	SNP-7.4877292.	7	4878292	0.000421976
Germination index	tropical japonica	SNP-7.9711639.	7	9712634	0.000356088
Germination index	tropical japonica	SNP-7.10291342.	7	10292337	0.00010984
Germination index	tropical japonica	SNP-7.10361057.	7	10362052	0.000968406
Germination index	tropical japonica	SNP-7.10463318.	7	10464313	0.000951814
Germination index	tropical japonica	SNP-7.10484637.	7	10485632	0.00045048
Germination index	tropical japonica	SNP-7.10524477.	7	10525472	0.00010247
Germination index	tropical japonica	SNP-7.10596777.	7	10597772	0.000245061
Germination index	tropical japonica	SNP-7.10646198.	7	10647193	0.000816048
Germination index	tropical japonica	SNP-7.10646333.	7	10647328	0.000326108
Germination index	tropical japonica	SNP-7.10901096.	7	10902091	0.000162603
Germination index	tropical japonica	SNP-7.12118018.	7	12119013	0.0003482
Germination index	tropical japonica	SNP-7.12342292.	7	12343286	0.000863403
Germination index	tropical japonica	SNP-7.12378385.	7	12379379	7.04751e-05
Germination index	tropical japonica	SNP-7.13210683.	7	13211677	8.20892e-05
Germination index	tropical japonica	SNP-7.13286056.	7	13287050	0.000417126
Germination index	tropical japonica	SNP-7.13358814.	7	13359808	4.00798e-06
Germination index	tropical japonica	SNP-7.13738033.	7	13739027	0.00029499
Germination index	tropical japonica	SNP-7.13815635.	7	13816629	0.000145879
Germination index	tropical japonica	SNP-7.14270019.	7	14271013	0.000911498
Germination index	tropical japonica	SNP-7.14426510.	7	14427504	0.000217933
Germination index	tropical japonica	SNP-7.14696872.	7	14697866	0.000896894
Germination index	tropical japonica	SNP-7.15051519.	7	15052513	0.000590359
Germination index	tropical japonica	SNP-7.15149935.	7	15150929	0.000804637
Germination index	tropical japonica	SNP-7.17521249.	7	17522243	0.000956403
Germination index	tropical japonica	SNP-7.20760441.	7	20761435	0.000856027
Germination index	tropical japonica	SNP-7.27859348.	7	27860342	0.00033089
Germination index	tropical japonica	SNP-7.27931392.	7	27932386	0.00038534
Germination index	tropical japonica	SNP-7.27931556.	7	27932550	0.00047456
Germination index	tropical japonica	SNP-7.27945731.	7	27946725	7.06354e-05
Germination index	tropical japonica	SNP-7.28189448.	7	28190442	0.000608726
Germination index	tropical japonica	SNP-7.28304417.	7	28305410	0.000168992
Germination index	tropical japonica	SNP-7.28668589.	7	28669582	0.000387899
Germination index	tropical japonica	SNP-7.29056122.	7	29057115	0.000186576
Germination index	tropical japonica	SNP-7.29647134.	7	29648127	0.000406582
Germination index	tropical japonica	SNP-8.2375409.	8	2376407	0.0002931
Germination index	tropical japonica	SNP-8.6141473.	8	6142469	1.09821e-06
Germination index	tropical japonica	SNP-8.7515040.	8	7516036	0.000761614
Germination index	tropical japonica	SNP-8.9622111.	8	9623108	0.000968765
Germination index	tropical japonica	SNP-8.10517558.	8	10518555	0.000691928
Germination index	tropical japonica	SNP-8.11982116.	8	11983112	0.000926462
Germination index	tropical japonica	SNP-8.13354461.	8	13356907	2.31853e-05
Germination index	tropical japonica	SNP-8.19114617.	8	19117331	0.000857659
Germination index	tropical japonica	SNP-8.21618436.	8	21621150	0.00062035
Germination index	tropical japonica	SNP-8.22921024.	8	22923738	0.000595932
Germination index	tropical japonica	SNP-8.23314232.	8	23316946	0.00021961
Germination index	tropical japonica	SNP-8.23583338.	8	23586053	3.46387e-05
Germination index	tropical japonica	SNP-9.954760.	9	955761	0.000279572
Germination index	tropical japonica	SNP-9.2145274.	9	2146275	3.77703e-05
Germination index	tropical japonica	SNP-9.2390014.	9	2391015	6.54193e-05
Germination index	tropical japonica	SNP-9.3567149.	9	3568150	0.000608157
Germination index	tropical japonica	SNP-9.17133679.	9	17134681	3.4241e-05
Germination index	tropical japonica	SNP-9.21073473.	9	21073955	0.000269499
Germination index	tropical japonica	SNP-10.1989551.	10	1990575	0.000360175
Germination index	tropical japonica	SNP-10.2020277.	10	2021301	0.00025697
Germination index	tropical japonica	SNP-10.6856081.	10	6840459	0.000184419
Germination index	tropical japonica	SNP-10.6952478.	10	6936856	0.000958218
Germination index	tropical japonica	SNP-10.7127019.	10	7111397	1.13727e-06
Germination index	tropical japonica	SNP-10.9117235.	10	9188415	0.00049506
Germination index	tropical japonica	SNP-10.9166187.	10	9237367	2.31178e-06
Germination index	tropical japonica	SNP-10.9745098.	10	9816278	0.000994905
Germination index	tropical japonica	SNP-10.10094264.	10	10165444	0.000585708
Germination index	tropical japonica	SNP-10.10096759.	10	10167939	0.000528101
Germination index	tropical japonica	SNP-10.10186190.	10	10257370	0.000231761
Germination index	tropical japonica	SNP-10.10264057.	10	10335237	0.000815612
Germination index	tropical japonica	SNP-10.14724026.	10	14795261	0.00025478
Germination index	tropical japonica	SNP-10.18469932.	10	18541376	0.000229987
Germination index	tropical japonica	SNP-10.19358148.	10	19429594	7.74861e-05
Germination index	tropical japonica	SNP-10.20041272.	10	20112775	0.000313115
Germination index	tropical japonica	SNP-11.12007819.	11	12013503	0.000102302
Germination index	tropical japonica	SNP-11.12587726.	11	13051406	0.000791294
Germination index	tropical japonica	SNP-11.13369150.	11	13832830	0.000732181
Germination index	tropical japonica	SNP-11.18038875.	11	18505018	4.66846e-05
Germination index	tropical japonica	SNP-11.19539824.	11	20005902	0.000200907
Germination index	tropical japonica	SNP-11.19705182.	11	20171261	0.000293694
Germination index	tropical japonica	SNP-12.215838.	12	216839	0.000702983
Germination index	tropical japonica	SNP-12.951636.	12	952637	0.000210505
Germination index	tropical japonica	SNP-12.1027486.	12	1028487	0.000717252
Germination index	tropical japonica	SNP-12.3286420.	12	3287418	0.000348189
Germination index	tropical japonica	SNP-12.3330235.	12	3331233	8.26126e-05
Germination index	tropical japonica	SNP-12.3770894.	12	3771896	0.000505154
Germination index	tropical japonica	SNP-12.8812706.	12	8815300	2.22122e-05
Germination index	tropical japonica	SNP-12.10952243.	12	10954878	0.000511111
Germination index	tropical japonica	SNP-12.13095820.	12	13098482	0.000801246
Germination index	tropical japonica	SNP-12.13468922.	12	13471585	0.000630444
Germination index	tropical japonica	SNP-12.14308724.	12	14311385	0.000332003
Germination index	tropical japonica	SNP-12.14529997.	12	14532657	0.000551204
Germination index	tropical japonica	SNP-12.14744171.	12	14746831	0.000901164
Germination index	tropical japonica	SNP-12.15187645.	12	15190312	6.21631e-05
Germination index	tropical japonica	SNP-12.18082585.	12	18111150	0.000112672
Germination index	tropical japonica	SNP-12.20316703.	12	20345262	0.000893865
Germination index	tropical japonica	SNP-12.21801346.	12	21834800	0.000314406
Germination index	tropical japonica	SNP-12.23656154.	12	23689702	0.000282767
Germination index	tropical japonica	SNP-12.23669463.	12	23703011	0.000731079
Germination index	tropical japonica	SNP-12.24540696.	12	24574243	8.56757e-06
Germination index	tropical japonica	SNP-12.26884547.	12	26918149	0.000798446

## Sheet: PercentSterility
Trait	Subpopulation group	SNP-Name	Chromo-some	SNP position (bp)	p-value
Percent sterility	JAPONICA	SNP-1.2080216.	1	2081217	0.00079821
Percent sterility	JAPONICA	SNP-1.6383199.	1	6384200	0.000754892
Percent sterility	JAPONICA	SNP-1.10647969.	1	10648994	0.0004112
Percent sterility	JAPONICA	SNP-1.17970433.	1	17971480	0.000492184
Percent sterility	JAPONICA	SNP-1.19162628.	1	19163674	0.000149624
Percent sterility	JAPONICA	SNP-1.20223382.	1	20224428	0.000979895
Percent sterility	JAPONICA	SNP-1.23022922.	1	23023967	0.000117481
Percent sterility	JAPONICA	SNP-1.27149935.	1	27150980	0.000132218
Percent sterility	JAPONICA	SNP-1.31908807.	1	31909852	0.000300593
Percent sterility	JAPONICA	SNP-1.34849157.	1	34850201	0.000900589
Percent sterility	JAPONICA	SNP-2.18725608.	2	18731478	0.000422085
Percent sterility	JAPONICA	SNP-2.18739919.	2	18745789	0.000694372
Percent sterility	JAPONICA	SNP-2.18750587.	2	18756457	0.000413718
Percent sterility	JAPONICA	SNP-2.18754533.	2	18760403	0.000724147
Percent sterility	JAPONICA	SNP-2.19265736.	2	19271605	0.00081448
Percent sterility	JAPONICA	SNP-2.19314407.	2	19320276	0.000361116
Percent sterility	JAPONICA	SNP-2.19338575.	2	19344444	0.000368657
Percent sterility	JAPONICA	SNP-2.19358567.	2	19364436	0.000777746
Percent sterility	JAPONICA	SNP-2.19376003.	2	19381872	0.000168873
Percent sterility	JAPONICA	SNP-2.19388015.	2	19393884	0.000599353
Percent sterility	JAPONICA	SNP-2.19418359.	2	19424228	0.000224979
Percent sterility	JAPONICA	SNP-2.19420084.	2	19425953	3.16054e-05
Percent sterility	JAPONICA	SNP-2.19421819.	2	19427688	0.000148994
Percent sterility	JAPONICA	SNP-2.21558580.	2	21564450	5.42695e-06
Percent sterility	JAPONICA	SNP-2.22408790.	2	22414660	0.000713762
Percent sterility	JAPONICA	SNP-2.22412121.	2	22417991	0.00057644
Percent sterility	JAPONICA	SNP-2.22532773.	2	22538643	0.000203237
Percent sterility	JAPONICA	SNP-2.22552242.	2	22558112	0.000287986
Percent sterility	JAPONICA	SNP-2.22555590.	2	22561460	0.0009465
Percent sterility	JAPONICA	SNP-2.24281423.	2	24287293	0.000289582
Percent sterility	JAPONICA	SNP-2.24282975.	2	24288845	0.000438015
Percent sterility	JAPONICA	SNP-2.24750066.	2	24755936	0.000939974
Percent sterility	JAPONICA	SNP-2.35316493.	2	35322363	0.000953201
Percent sterility	JAPONICA	SNP-3.5621606.	3	5622607	0.000818835
Percent sterility	JAPONICA	SNP-3.6610712.	3	6611713	0.000956508
Percent sterility	JAPONICA	SNP-3.6885196.	3	6886199	2.95338e-05
Percent sterility	JAPONICA	SNP-3.6898304.	3	6899307	0.000842008
Percent sterility	JAPONICA	SNP-3.9831112.	3	9832177	0.000408672
Percent sterility	JAPONICA	SNP-3.9856355.	3	9857420	0.000485742
Percent sterility	JAPONICA	SNP-3.17228651.	3	17229842	0.000635635
Percent sterility	JAPONICA	SNP-3.19212511.	3	19213752	0.000977019
Percent sterility	JAPONICA	SNP-3.21259004.	3	21260495	0.000697741
Percent sterility	JAPONICA	SNP-3.24069336.	3	24071258	0.000340084
Percent sterility	JAPONICA	SNP-3.24226557.	3	24228479	9.4729e-05
Percent sterility	JAPONICA	SNP-3.27513449.	3	27520397	0.000868761
Percent sterility	JAPONICA	SNP-3.27751189.	3	27758137	0.00097487
Percent sterility	JAPONICA	SNP-3.29568511.	3	29575472	0.000399549
Percent sterility	JAPONICA	SNP-3.31997421.	3	32004545	0.00023196
Percent sterility	JAPONICA	SNP-4.2082427.	4	2086834	0.000844795
Percent sterility	JAPONICA	SNP-4.5190420.	4	5194980	0.00092929
Percent sterility	JAPONICA	SNP-4.12124083.	4	12133373	0.000978451
Percent sterility	JAPONICA	SNP-4.12821680.	4	12830972	0.00032382
Percent sterility	JAPONICA	SNP-4.20593640.	4	20765598	0.00076449
Percent sterility	JAPONICA	SNP-4.24011578.	4	24196718	9.57306e-06
Percent sterility	JAPONICA	SNP-4.24542228.	4	24727368	8.64939e-05
Percent sterility	JAPONICA	SNP-4.32960989.	4	33146102	0.000185061
Percent sterility	JAPONICA	SNP-5.11488446.	5	11488517	0.000431537
Percent sterility	JAPONICA	SNP-5.11767208.	5	11767279	0.000611922
Percent sterility	JAPONICA	SNP-5.12820799.	5	12877878	0.000535703
Percent sterility	JAPONICA	SNP-5.13515893.	5	13573347	0.000803191
Percent sterility	JAPONICA	SNP-5.16925375.	5	16985735	0.000772758
Percent sterility	JAPONICA	SNP-5.17261484.	5	17321842	0.000654921
Percent sterility	JAPONICA	SNP-5.23486048.	5	23548628	0.000825072
Percent sterility	JAPONICA	SNP-5.24969153.	5	25031739	0.00017607
Percent sterility	JAPONICA	SNP-5.25841018.	5	25903598	5.28002e-05
Percent sterility	JAPONICA	SNP-5.27597919.	5	27660563	0.000691523
Percent sterility	JAPONICA	SNP-5.29060324.	5	29122970	0.000960696
Percent sterility	JAPONICA	SNP-5.29844960.	5	29907606	0.0003018
Percent sterility	JAPONICA	SNP-6.2540280.	6	2541280	0.00088277
Percent sterility	JAPONICA	SNP-6.6516088.	6	6517088	0.000851596
Percent sterility	JAPONICA	SNP-6.6986125.	6	6987125	0.000856325
Percent sterility	JAPONICA	SNP-6.8312556.	6	8313556	0.000781691
Percent sterility	JAPONICA	SNP-6.8329313.	6	8330313	0.00057505
Percent sterility	JAPONICA	SNP-6.8337452.	6	8338452	0.00076999
Percent sterility	JAPONICA	SNP-6.8338606.	6	8339606	0.000760835
Percent sterility	JAPONICA	SNP-6.8771617.	6	8772617	0.000272361
Percent sterility	JAPONICA	SNP-6.10838152.	6	10839152	0.000670225
Percent sterility	JAPONICA	SNP-6.10858691.	6	10859691	0.000855267
Percent sterility	JAPONICA	SNP-6.10860002.	6	10861002	0.0002281
Percent sterility	JAPONICA	SNP-6.10867084.	6	10868084	0.000387002
Percent sterility	JAPONICA	SNP-6.11376167.	6	11377167	0.000916379
Percent sterility	JAPONICA	SNP-6.12911836.	6	12912836	8.81459e-06
Percent sterility	JAPONICA	SNP-6.13297661.	6	13298661	0.000808024
Percent sterility	JAPONICA	SNP-6.13418700.	6	13419700	0.000173722
Percent sterility	JAPONICA	SNP-6.13462884.	6	13463884	0.00055517
Percent sterility	JAPONICA	SNP-6.13466199.	6	13467199	1.36007e-05
Percent sterility	JAPONICA	SNP-6.13476930.	6	13477930	0.000114599
Percent sterility	JAPONICA	SNP-6.13530732.	6	13531732	0.000566632
Percent sterility	JAPONICA	SNP-6.13556606.	6	13557606	0.000259294
Percent sterility	JAPONICA	SNP-6.13779214.	6	13780214	0.000592564
Percent sterility	JAPONICA	SNP-6.14026904.	6	14027904	2.98066e-05
Percent sterility	JAPONICA	SNP-6.14064078.	6	14065078	0.000690467
Percent sterility	JAPONICA	SNP-6.14091224.	6	14092224	0.000384615
Percent sterility	JAPONICA	SNP-6.14110368.	6	14111368	0.00089231
Percent sterility	JAPONICA	SNP-6.14175511.	6	14176511	0.000750997
Percent sterility	JAPONICA	SNP-6.14178716.	6	14179716	0.000336181
Percent sterility	JAPONICA	SNP-6.14491953.	6	14492953	0.0004523
Percent sterility	JAPONICA	SNP-6.14519587.	6	14520587	0.00018425
Percent sterility	JAPONICA	SNP-6.14604458.	6	14605458	0.000346524
Percent sterility	JAPONICA	SNP-6.14612587.	6	14613587	0.000910742
Percent sterility	JAPONICA	SNP-6.14709147.	6	14710147	0.000142422
Percent sterility	JAPONICA	SNP-6.14751498.	6	14752498	0.000608055
Percent sterility	JAPONICA	SNP-6.14773067.	6	14774067	6.08056e-05
Percent sterility	JAPONICA	SNP-6.14865837.	6	14866837	0.000662709
Percent sterility	JAPONICA	SNP-6.14894410.	6	14895410	0.000429022
Percent sterility	JAPONICA	SNP-6.15094414.	6	15095414	0.000149648
Percent sterility	JAPONICA	SNP-6.15271911.	6	15272911	0.000122488
Percent sterility	JAPONICA	SNP-6.15312928.	6	15313928	0.000804956
Percent sterility	JAPONICA	SNP-6.15386508.	6	15387508	0.000578572
Percent sterility	JAPONICA	SNP-6.15406600.	6	15407600	0.000977332
Percent sterility	JAPONICA	SNP-6.15563098.	6	15564097	0.000939791
Percent sterility	JAPONICA	SNP-6.15626371.	6	15627370	0.000476361
Percent sterility	JAPONICA	SNP-6.15670133.	6	15671132	0.000868406
Percent sterility	JAPONICA	SNP-6.15743984.	6	15744983	0.000142245
Percent sterility	JAPONICA	SNP-6.15805755.	6	15806754	0.000379228
Percent sterility	JAPONICA	SNP-6.15806547.	6	15807546	0.000711828
Percent sterility	JAPONICA	SNP-6.16005726.	6	16006725	0.00063039
Percent sterility	JAPONICA	SNP-6.16133580.	6	16134579	0.000988807
Percent sterility	JAPONICA	SNP-6.16490060.	6	16491059	0.000319304
Percent sterility	JAPONICA	SNP-6.16653322.	6	16654321	0.000709845
Percent sterility	JAPONICA	SNP-6.16657583.	6	16658582	0.000160805
Percent sterility	JAPONICA	SNP-6.16683094.	6	16684093	0.000937516
Percent sterility	JAPONICA	SNP-6.16699054.	6	16700053	0.000858386
Percent sterility	JAPONICA	SNP-6.16764246.	6	16765245	0.00016995
Percent sterility	JAPONICA	SNP-6.17068255.	6	17069253	0.000933772
Percent sterility	JAPONICA	SNP-6.17124618.	6	17125616	0.000352156
Percent sterility	JAPONICA	SNP-6.17139146.	6	17140144	0.000783533
Percent sterility	JAPONICA	SNP-6.17354722.	6	17355720	0.000554566
Percent sterility	JAPONICA	SNP-6.18532011.	6	18533009	0.000353293
Percent sterility	JAPONICA	SNP-6.19464586.	6	19465584	0.000363554
Percent sterility	JAPONICA	SNP-6.20266848.	6	20267846	0.00023142
Percent sterility	JAPONICA	SNP-6.22044844.	6	22045842	3.24443e-05
Percent sterility	JAPONICA	SNP-6.22529809.	6	22530807	0.000420711
Percent sterility	JAPONICA	SNP-6.22529955.	6	22530953	0.000593259
Percent sterility	JAPONICA	SNP-6.22677093.	6	22678091	0.000502411
Percent sterility	JAPONICA	SNP-6.23832411.	6	23833409	0.000733917
Percent sterility	JAPONICA	SNP-6.29164910.	6	29165909	0.000618477
Percent sterility	JAPONICA	SNP-6.30114955.	6	30115954	0.000886319
Percent sterility	JAPONICA	SNP-6.30527997.	6	30528996	0.00095149
Percent sterility	JAPONICA	SNP-6.30889503.	6	30890502	0.000441148
Percent sterility	JAPONICA	SNP-7.4743028.	7	4744028	0.000447148
Percent sterility	JAPONICA	SNP-7.7558809.	7	7559805	0.000888555
Percent sterility	JAPONICA	SNP-7.7733246.	7	7734242	0.000535683
Percent sterility	JAPONICA	SNP-7.8909685.	7	8910680	0.000394486
Percent sterility	JAPONICA	SNP-7.9543968.	7	9544963	0.000277838
Percent sterility	JAPONICA	SNP-7.12296221.	7	12297215	4.9932e-05
Percent sterility	JAPONICA	SNP-7.13712700.	7	13713694	3.79216e-05
Percent sterility	JAPONICA	SNP-7.13767617.	7	13768611	0.00040967
Percent sterility	JAPONICA	SNP-7.14043014.	7	14044008	0.00039437
Percent sterility	JAPONICA	SNP-7.14084115.	7	14085109	0.000903748
Percent sterility	JAPONICA	SNP-7.14089293.	7	14090287	0.000730839
Percent sterility	JAPONICA	SNP-7.14107443.	7	14108437	0.000875999
Percent sterility	JAPONICA	SNP-7.14107626.	7	14108620	2.50816e-05
Percent sterility	JAPONICA	SNP-7.14188734.	7	14189728	0.000954592
Percent sterility	JAPONICA	SNP-7.14193761.	7	14194755	0.000637492
Percent sterility	JAPONICA	SNP-7.14315352.	7	14316346	3.43973e-05
Percent sterility	JAPONICA	SNP-7.14394017.	7	14395011	9.3886e-05
Percent sterility	JAPONICA	SNP-7.14404265.	7	14405259	0.000806237
Percent sterility	JAPONICA	SNP-7.14422784.	7	14423778	0.000995919
Percent sterility	JAPONICA	SNP-7.14423885.	7	14424879	0.000321021
Percent sterility	JAPONICA	SNP-7.14448527.	7	14449521	0.000899772
Percent sterility	JAPONICA	SNP-7.14449623.	7	14450617	0.000696581
Percent sterility	JAPONICA	SNP-7.14470045.	7	14471039	0.000581975
Percent sterility	JAPONICA	SNP-7.17851511.	7	17852505	0.000820994
Percent sterility	JAPONICA	SNP-7.18812531.	7	18813525	0.000838495
Percent sterility	JAPONICA	SNP-7.18954749.	7	18955743	0.000574294
Percent sterility	JAPONICA	SNP-7.19064024.	7	19065018	0.000911669
Percent sterility	JAPONICA	SNP-7.19082707.	7	19083701	0.00078025
Percent sterility	JAPONICA	SNP-7.21515026.	7	21516020	0.000908778
Percent sterility	JAPONICA	SNP-7.26050329.	7	26051324	0.000987929
Percent sterility	JAPONICA	SNP-8.1951707.	8	1952705	5.72495e-05
Percent sterility	JAPONICA	SNP-8.5071420.	8	5072418	0.000784478
Percent sterility	JAPONICA	SNP-8.5817820.	8	5818818	0.000260564
Percent sterility	JAPONICA	SNP-8.6364973.	8	6365969	0.000655551
Percent sterility	JAPONICA	SNP-8.8303422.	8	8304419	0.000216625
Percent sterility	JAPONICA	SNP-8.9996441.	8	9997438	0.000928042
Percent sterility	JAPONICA	SNP-8.10042235.	8	10043232	0.000397478
Percent sterility	JAPONICA	SNP-8.14034073.	8	14036788	0.000849826
Percent sterility	JAPONICA	SNP-8.15691711.	8	15694426	0.000994317
Percent sterility	JAPONICA	SNP-8.15967043.	8	15969758	0.00079466
Percent sterility	JAPONICA	SNP-8.20623140.	8	20625854	0.000741217
Percent sterility	JAPONICA	SNP-8.23721319.	8	23724034	0.000594203
Percent sterility	JAPONICA	SNP-8.26589757.	8	26592472	0.000644932
Percent sterility	JAPONICA	SNP-9.873597.	9	874598	2.66763e-05
Percent sterility	JAPONICA	SNP-9.1175319.	9	1176320	0.000658969
Percent sterility	JAPONICA	SNP-9.3411517.	9	3412518	5.86979e-05
Percent sterility	JAPONICA	SNP-9.3985344.	9	3986345	0.000472903
Percent sterility	JAPONICA	SNP-9.14307402.	9	14308404	0.000647998
Percent sterility	JAPONICA	SNP-9.16603687.	9	16604689	0.000838808
Percent sterility	JAPONICA	SNP-9.20142210.	9	20142692	0.000212687
Percent sterility	JAPONICA	SNP-9.20163391.	9	20163873	0.00079691
Percent sterility	JAPONICA	SNP-9.20421644.	9	20422126	0.000456849
Percent sterility	JAPONICA	SNP-10.8882768.	10	8953908	0.000794658
Percent sterility	JAPONICA	SNP-10.9043642.	10	9114782	0.000286026
Percent sterility	JAPONICA	SNP-10.9126278.	10	9197458	0.000773269
Percent sterility	JAPONICA	SNP-10.12774442.	10	12845628	0.000826734
Percent sterility	JAPONICA	SNP-10.14858666.	10	14929901	0.000937152
Percent sterility	JAPONICA	SNP-10.15403165.	10	15474398	7.32575e-05
Percent sterility	JAPONICA	SNP-10.18807353.	10	18878798	0.000124599
Percent sterility	JAPONICA	SNP-10.19262261.	10	19333707	0.000239277
Percent sterility	JAPONICA	SNP-10.20333243.	10	20404765	0.000811881
Percent sterility	JAPONICA	SNP-10.21706970.	10	21778495	0.000169457
Percent sterility	JAPONICA	SNP-11.1602414.	11	1603414	0.000902744
Percent sterility	JAPONICA	SNP-11.3361245.	11	3365343	0.000822153
Percent sterility	JAPONICA	SNP-11.3675035.	11	3679134	0.000852266
Percent sterility	JAPONICA	SNP-11.8310162.	11	8315553	0.000640771
Percent sterility	JAPONICA	SNP-11.13850101.	11	14313781	0.000613984
Percent sterility	JAPONICA	SNP-11.20179143.	11	20645223	0.000966671
Percent sterility	JAPONICA	SNP-11.21274025.	11	21740149	0.000679998
Percent sterility	JAPONICA	SNP-11.23173263.	11	23639394	0.000843031
Percent sterility	JAPONICA	SNP-11.24238269.	11	24704430	0.000985495
Percent sterility	JAPONICA	SNP-11.24292512.	11	24758673	0.000907202
Percent sterility	JAPONICA	SNP-11.24325058.	11	24791219	0.000946704
Percent sterility	JAPONICA	SNP-11.24563957.	11	25030118	0.000645748
Percent sterility	JAPONICA	SNP-11.24573131.	11	25039292	0.000946149
Percent sterility	JAPONICA	SNP-11.24647535.	11	25113696	0.000698688
Percent sterility	JAPONICA	SNP-11.27331370.	11	27802985	0.000379752
Percent sterility	JAPONICA	SNP-12.395419.	12	396420	0.000853558
Percent sterility	JAPONICA	SNP-12.3160978.	12	3161976	0.000563711
Percent sterility	JAPONICA	SNP-12.3224102.	12	3225100	0.000265326
Percent sterility	JAPONICA	SNP-12.4454230.	12	4455243	0.000985343
Percent sterility	JAPONICA	SNP-12.7110459.	12	7111570	0.000901069
Percent sterility	JAPONICA	SNP-12.7231902.	12	7234507	0.000653596
Percent sterility	JAPONICA	SNP-12.7240731.	12	7243334	0.000416913
Percent sterility	JAPONICA	SNP-12.7345185.	12	7347779	0.000593595
Percent sterility	JAPONICA	SNP-12.7472028.	12	7474623	0.000173465
Percent sterility	JAPONICA	SNP-12.8874614.	12	8877207	0.000123197
Percent sterility	JAPONICA	SNP-12.9087773.	12	9090365	0.000918617
Percent sterility	JAPONICA	SNP-12.10729942.	12	10732530	0.000141945
Percent sterility	JAPONICA	SNP-12.12457508.	12	12460170	0.000488569
Percent sterility	JAPONICA	SNP-12.12461028.	12	12463690	0.000776114
Percent sterility	JAPONICA	SNP-12.12832806.	12	12835468	0.000509233
Percent sterility	JAPONICA	SNP-12.13279395.	12	13282058	8.64142e-05
Percent sterility	JAPONICA	SNP-12.13987605.	12	13990266	0.000677642
Percent sterility	JAPONICA	SNP-12.14279160.	12	14281821	0.000842264
Percent sterility	JAPONICA	SNP-12.14387365.	12	14390025	0.000746216
Percent sterility	JAPONICA	SNP-12.14603088.	12	14605749	0.000411031
Percent sterility	JAPONICA	SNP-12.16156903.	12	16159608	0.00080773
Percent sterility	JAPONICA	SNP-12.18155038.	12	18183603	0.000187578
Percent sterility	JAPONICA	SNP-12.23982000.	12	24015548	0.000830482
Percent sterility	JAPONICA	SNP-12.24522851.	12	24556398	0.000520419
Percent sterility	JAPONICA	SNP-12.24870100.	12	24903647	0.000412785
Percent sterility	JAPONICA	SNP-12.26134431.	12	26168038	0.000531715
Percent sterility	JAPONICA	SNP-12.27296318.	12	27329919	0.00012506

## Sheet: SeedWgt per panicle
Trait	Subpopulation group	SNP-Name	Chromo-some	SNP position (bp)	p-value
SWPan	JAPONICA	SNP-1.2087152.	1	2088153	0.000933243
SWPan	JAPONICA	SNP-1.2089609.	1	2090610	0.000763076
SWPan	JAPONICA	SNP-1.3182999.	1	3184000	0.000810279
SWPan	JAPONICA	SNP-1.3234985.	1	3235986	0.000490594
SWPan	JAPONICA	SNP-1.3235782.	1	3236783	0.000140875
SWPan	JAPONICA	SNP-1.3240761.	1	3241762	0.000499115
SWPan	JAPONICA	SNP-1.3250462.	1	3251463	0.000545842
SWPan	JAPONICA	SNP-1.3298408.	1	3299409	0.000597052
SWPan	JAPONICA	SNP-1.3308216.	1	3309217	0.000937454
SWPan	JAPONICA	SNP-1.3450810.	1	3451811	4.28523e-05
SWPan	JAPONICA	SNP-1.5073659.	1	5074660	0.000609782
SWPan	JAPONICA	SNP-1.5087466.	1	5088467	0.000859719
SWPan	JAPONICA	SNP-1.5195547.	1	5196548	0.00052408
SWPan	JAPONICA	SNP-1.5362852.	1	5363853	0.00011182
SWPan	JAPONICA	SNP-1.7749831.	1	7750832	0.000330113
SWPan	JAPONICA	SNP-1.7750158.	1	7751159	0.000856435
SWPan	JAPONICA	SNP-1.10675924.	1	10676949	0.000775217
SWPan	JAPONICA	SNP-1.14773228.	1	14774255	0.000741339
SWPan	JAPONICA	SNP-1.15450600.	1	15451627	0.000721406
SWPan	JAPONICA	SNP-1.15553332.	1	15554359	0.000640057
SWPan	JAPONICA	SNP-1.15637146.	1	15638173	0.000669297
SWPan	JAPONICA	SNP-1.16937130.	1	16938177	0.00092269
SWPan	JAPONICA	SNP-1.17448691.	1	17449738	0.000845142
SWPan	JAPONICA	SNP-1.17598784.	1	17599831	0.000867748
SWPan	JAPONICA	SNP-1.17887945.	1	17888992	0.000976539
SWPan	JAPONICA	SNP-1.18045626.	1	18046673	0.000640057
SWPan	JAPONICA	SNP-1.18574101.	1	18575148	0.00067152
SWPan	JAPONICA	SNP-1.18721306.	1	18722353	0.000922445
SWPan	JAPONICA	SNP-1.22237777.	1	22238823	0.000495801
SWPan	JAPONICA	SNP-1.22242070.	1	22243116	0.00093547
SWPan	JAPONICA	SNP-1.22286415.	1	22287461	0.000332587
SWPan	JAPONICA	SNP-1.23465198.	1	23466243	0.000606972
SWPan	JAPONICA	SNP-1.24198072.	1	24199117	8.23322e-05
SWPan	JAPONICA	SNP-1.40401836.	1	40402880	0.000523984
SWPan	JAPONICA	SNP-1.42029044.	1	42030088	0.000277534
SWPan	JAPONICA	SNP-1.42036815.	1	42037859	0.000928491
SWPan	JAPONICA	SNP-1.42427537.	1	42428582	0.000802635
SWPan	JAPONICA	SNP-1.43014929.	1	43015974	0.00019955
SWPan	JAPONICA	SNP-1.43020079.	1	43021124	0.000820223
SWPan	JAPONICA	SNP-1.43020423.	1	43021468	0.000410717
SWPan	JAPONICA	SNP-1.43038349.	1	43039394	0.000639004
SWPan	JAPONICA	SNP-1.43042962.	1	43044007	0.000502156
SWPan	JAPONICA	SNP-1.43043421.	1	43044466	0.000250534
SWPan	JAPONICA	SNP-1.43047305.	1	43048350	0.000139956
SWPan	JAPONICA	SNP-1.43058074.	1	43059119	0.000502156
SWPan	JAPONICA	SNP-1.43075707.	1	43076752	0.000759834
SWPan	JAPONICA	SNP-1.43092159.	1	43093204	0.000397023
SWPan	JAPONICA	SNP-1.43104618.	1	43105663	0.000472492
SWPan	JAPONICA	SNP-1.43116708.	1	43117753	0.000812808
SWPan	JAPONICA	SNP-1.43119248.	1	43120293	0.000502156
SWPan	JAPONICA	SNP-1.43135562.	1	43136607	0.000806762
SWPan	JAPONICA	SNP-1.43136492.	1	43137537	0.000502156
SWPan	JAPONICA	SNP-1.43139287.	1	43140332	0.000412115
SWPan	JAPONICA	SNP-1.43139516.	1	43140561	0.000502156
SWPan	JAPONICA	SNP-1.43142999.	1	43144044	0.000271877
SWPan	JAPONICA	SNP-1.43145648.	1	43146693	0.000533211
SWPan	JAPONICA	SNP-1.43152974.	1	43154019	0.000283915
SWPan	JAPONICA	SNP-1.43155595.	1	43156640	0.000400151
SWPan	JAPONICA	SNP-1.43157476.	1	43158521	0.000325996
SWPan	JAPONICA	SNP-1.43158014.	1	43159059	0.000295793
SWPan	JAPONICA	SNP-1.43162487.	1	43163532	0.000502156
SWPan	JAPONICA	SNP-1.43166114.	1	43167159	0.000547073
SWPan	JAPONICA	SNP-1.43176160.	1	43177205	0.000809488
SWPan	JAPONICA	SNP-1.43176275.	1	43177320	0.000421027
SWPan	JAPONICA	SNP-1.43178474.	1	43179519	0.000735115
SWPan	JAPONICA	SNP-1.43182829.	1	43183874	0.000456606
SWPan	JAPONICA	SNP-1.43183278.	1	43184323	0.000305559
SWPan	JAPONICA	SNP-1.43183654.	1	43184699	0.000253305
SWPan	JAPONICA	SNP-1.43183922.	1	43184967	0.00034526
SWPan	JAPONICA	SNP-1.43197765.	1	43198810	0.000502156
SWPan	JAPONICA	SNP-1.43218507.	1	43219552	0.000500506
SWPan	JAPONICA	SNP-1.43232068.	1	43233113	0.000270391
SWPan	JAPONICA	SNP-2.1936111.	2	1936112	0.000451516
SWPan	JAPONICA	SNP-2.2533937.	2	2533940	0.000296712
SWPan	JAPONICA	SNP-2.3404118.	2	3404121	0.000771323
SWPan	JAPONICA	SNP-2.4552081.	2	4552085	3.46852e-05
SWPan	JAPONICA	SNP-2.6752428.	2	6752429	0.000764643
SWPan	JAPONICA	SNP-2.7114936.	2	7114937	0.000717608
SWPan	JAPONICA	SNP-2.12756856.	2	12756861	0.000775147
SWPan	JAPONICA	SNP-2.18688692.	2	18694562	0.000917159
SWPan	JAPONICA	SNP-2.18701429.	2	18707299	0.000755676
SWPan	JAPONICA	SNP-2.18723362.	2	18729232	0.000909059
SWPan	JAPONICA	SNP-2.18739919.	2	18745789	0.000609517
SWPan	JAPONICA	SNP-2.18750587.	2	18756457	0.000756044
SWPan	JAPONICA	SNP-2.18754533.	2	18760403	0.000277827
SWPan	JAPONICA	SNP-2.18762217.	2	18768087	0.00053508
SWPan	JAPONICA	SNP-2.18762925.	2	18768795	0.000409184
SWPan	JAPONICA	SNP-2.20651782.	2	20657651	0.000272463
SWPan	JAPONICA	SNP-2.20825066.	2	20830935	0.000940633
SWPan	JAPONICA	SNP-2.20996845.	2	21002714	0.000963089
SWPan	JAPONICA	SNP-2.21113114.	2	21118983	0.000813919
SWPan	JAPONICA	SNP-2.21203838.	2	21209707	0.000538992
SWPan	JAPONICA	SNP-2.21229662.	2	21235531	0.000408219
SWPan	JAPONICA	SNP-2.21427011.	2	21432880	0.000194073
SWPan	JAPONICA	SNP-2.21533544.	2	21539414	0.000194193
SWPan	JAPONICA	SNP-2.23985628.	2	23991498	0.00056098
SWPan	JAPONICA	SNP-2.24799290.	2	24805160	0.00031751
SWPan	JAPONICA	SNP-2.25017153.	2	25023023	0.000302381
SWPan	JAPONICA	SNP-2.28041081.	2	28046951	0.0003678
SWPan	JAPONICA	SNP-2.28611605.	2	28617475	0.000294316
SWPan	JAPONICA	SNP-2.28659843.	2	28665713	1.67937e-05
SWPan	JAPONICA	SNP-2.29061264.	2	29067134	0.000358688
SWPan	JAPONICA	SNP-2.29110316.	2	29116186	0.000276593
SWPan	JAPONICA	SNP-2.29182599.	2	29188469	0.000323014
SWPan	JAPONICA	SNP-2.29186643.	2	29192513	7.64113e-05
SWPan	JAPONICA	SNP-2.29190773.	2	29196643	0.000523197
SWPan	JAPONICA	SNP-2.29192550.	2	29198420	7.64113e-05
SWPan	JAPONICA	SNP-2.33022975.	2	33028845	0.000401327
SWPan	JAPONICA	SNP-2.33312190.	2	33318060	0.00070908
SWPan	JAPONICA	SNP-2.33606044.	2	33611914	0.000843011
SWPan	JAPONICA	SNP-2.34485175.	2	34491045	0.000412595
SWPan	JAPONICA	SNP-3.6480696.	3	6481697	0.000450825
SWPan	JAPONICA	SNP-3.7232909.	3	7233912	0.000325571
SWPan	JAPONICA	SNP-3.11294794.	3	11296077	0.000330045
SWPan	JAPONICA	SNP-3.11711796.	3	11713079	0.000790838
SWPan	JAPONICA	SNP-3.12920375.	3	12921658	0.000677441
SWPan	JAPONICA	SNP-3.12930087.	3	12931370	0.000852694
SWPan	JAPONICA	SNP-3.14078244.	3	14079556	6.55223e-05
SWPan	JAPONICA	SNP-3.14277869.	3	14279181	0.000277121
SWPan	JAPONICA	SNP-3.21764777.	3	21766268	0.000139796
SWPan	JAPONICA	SNP-3.30865701.	3	30872815	0.000415911
SWPan	JAPONICA	SNP-4.7980255.	4	7984987	0.000795681
SWPan	JAPONICA	SNP-4.10529991.	4	10539293	0.000795189
SWPan	JAPONICA	SNP-4.13373693.	4	13382983	0.000950499
SWPan	JAPONICA	SNP-4.14157557.	4	14166842	0.000507854
SWPan	JAPONICA	SNP-4.15696245.	4	15868213	0.000431175
SWPan	JAPONICA	SNP-4.16357446.	4	16529405	0.000747851
SWPan	JAPONICA	SNP-4.18110927.	4	18282882	0.000675192
SWPan	JAPONICA	SNP-4.20208079.	4	20380036	0.000146383
SWPan	JAPONICA	SNP-4.20224400.	4	20396357	0.00094394
SWPan	JAPONICA	SNP-4.20530771.	4	20702729	0.000372341
SWPan	JAPONICA	SNP-4.20552088.	4	20724046	0.00074789
SWPan	JAPONICA	SNP-4.23322178.	4	23507322	0.000666655
SWPan	JAPONICA	SNP-4.24011578.	4	24196718	0.000798406
SWPan	JAPONICA	SNP-4.26116110.	4	26301238	0.000845443
SWPan	JAPONICA	SNP-4.26899331.	4	27084460	2.57838e-05
SWPan	JAPONICA	SNP-4.32207751.	4	32392862	6.6876e-05
SWPan	JAPONICA	SNP-5.2120932.	5	2120959	0.000984375
SWPan	JAPONICA	SNP-5.6843229.	5	6843288	0.000232981
SWPan	JAPONICA	SNP-5.8159609.	5	8159670	0.000490492
SWPan	JAPONICA	SNP-5.9317609.	5	9317681	0.000165739
SWPan	JAPONICA	SNP-5.15869942.	5	15927436	0.000479958
SWPan	JAPONICA	SNP-5.17181487.	5	17241846	0.000165622
SWPan	JAPONICA	SNP-5.17183122.	5	17243481	0.000841398
SWPan	JAPONICA	SNP-5.17218734.	5	17279092	0.000396735
SWPan	JAPONICA	SNP-5.19403016.	5	19465533	0.000409155
SWPan	JAPONICA	SNP-5.19531801.	5	19594318	0.00051598
SWPan	JAPONICA	SNP-5.19795997.	5	19858522	0.000338735
SWPan	JAPONICA	SNP-5.26219637.	5	26282275	0.000865719
SWPan	JAPONICA	SNP-5.26778120.	5	26840763	0.000377784
SWPan	JAPONICA	SNP-5.26818655.	5	26881298	0.000345505
SWPan	JAPONICA	SNP-5.26922902.	5	26985547	0.000483361
SWPan	JAPONICA	SNP-5.26926106.	5	26988751	0.000942197
SWPan	JAPONICA	SNP-5.26956076.	5	27018721	0.000483851
SWPan	JAPONICA	SNP-5.26958800.	5	27021445	0.000370608
SWPan	JAPONICA	SNP-5.26972878.	5	27035523	0.000942905
SWPan	JAPONICA	SNP-5.26994659.	5	27057304	0.000911221
SWPan	JAPONICA	SNP-5.27132426.	5	27195071	0.000113647
SWPan	JAPONICA	SNP-5.27723835.	5	27786479	0.000770073
SWPan	JAPONICA	SNP-5.27816287.	5	27878931	0.000891392
SWPan	JAPONICA	SNP-5.27835715.	5	27898359	0.000990919
SWPan	JAPONICA	SNP-5.27843050.	5	27905694	0.000356567
SWPan	JAPONICA	SNP-5.27847253.	5	27909897	0.000908784
SWPan	JAPONICA	SNP-5.27852864.	5	27915508	0.000717494
SWPan	JAPONICA	SNP-5.28040071.	5	28102717	0.000754891
SWPan	JAPONICA	SNP-6.5388785.	6	5389785	6.2208e-05
SWPan	JAPONICA	SNP-6.5926522.	6	5927522	0.000599661
SWPan	JAPONICA	SNP-6.5934962.	6	5935962	0.000996789
SWPan	JAPONICA	SNP-6.5940494.	6	5941494	0.000587128
SWPan	JAPONICA	SNP-6.5950609.	6	5951609	0.00080308
SWPan	JAPONICA	SNP-6.5956449.	6	5957449	0.000584739
SWPan	JAPONICA	SNP-6.5962774.	6	5963774	0.000996789
SWPan	JAPONICA	SNP-6.5973942.	6	5974942	0.000488365
SWPan	JAPONICA	SNP-6.6009921.	6	6010921	0.000971184
SWPan	JAPONICA	SNP-6.6016519.	6	6017519	0.000790739
SWPan	JAPONICA	SNP-6.6175880.	6	6176880	0.000540623
SWPan	JAPONICA	SNP-6.6182770.	6	6183770	0.000473061
SWPan	JAPONICA	SNP-6.6185163.	6	6186163	0.000989062
SWPan	JAPONICA	SNP-6.6192134.	6	6193134	0.000775701
SWPan	JAPONICA	SNP-6.6192945.	6	6193945	0.000152211
SWPan	JAPONICA	SNP-6.6223357.	6	6224357	0.000336025
SWPan	JAPONICA	SNP-6.6334712.	6	6335712	0.000998421
SWPan	JAPONICA	SNP-6.13189353.	6	13190353	0.000702574
SWPan	JAPONICA	SNP-6.13191348.	6	13192348	0.000906923
SWPan	JAPONICA	SNP-6.13282781.	6	13283781	0.000931984
SWPan	JAPONICA	SNP-6.13362064.	6	13363064	0.000880397
SWPan	JAPONICA	SNP-6.13391219.	6	13392219	0.000678937
SWPan	JAPONICA	SNP-6.13462884.	6	13463884	0.000476794
SWPan	JAPONICA	SNP-6.20119358.	6	20120356	0.000667012
SWPan	JAPONICA	SNP-6.20151350.	6	20152348	0.000825668
SWPan	JAPONICA	SNP-6.20187809.	6	20188807	0.000518183
SWPan	JAPONICA	SNP-6.20551991.	6	20552989	0.000521612
SWPan	JAPONICA	SNP-6.20746839.	6	20747837	0.00088227
SWPan	JAPONICA	SNP-6.21930516.	6	21931514	0.000446873
SWPan	JAPONICA	SNP-6.22435503.	6	22436501	0.000748273
SWPan	JAPONICA	SNP-6.22677093.	6	22678091	0.000744632
SWPan	JAPONICA	SNP-6.22827513.	6	22828511	0.000686312
SWPan	JAPONICA	SNP-6.24707200.	6	24708198	0.000588029
SWPan	JAPONICA	SNP-6.24738212.	6	24739210	0.000847336
SWPan	JAPONICA	SNP-6.24748323.	6	24749321	0.000968486
SWPan	JAPONICA	SNP-6.24749110.	6	24750108	0.000895279
SWPan	JAPONICA	SNP-6.24777802.	6	24778800	0.000813789
SWPan	JAPONICA	SNP-6.24811034.	6	24812032	0.000242065
SWPan	JAPONICA	SNP-6.24811569.	6	24812567	0.000878728
SWPan	JAPONICA	SNP-6.24900816.	6	24901814	0.000391927
SWPan	JAPONICA	SNP-6.25063527.	6	25064525	0.000235964
SWPan	JAPONICA	SNP-6.25064362.	6	25065360	0.000188063
SWPan	JAPONICA	SNP-6.25154332.	6	25155330	0.000443258
SWPan	JAPONICA	SNP-7.1699574.	7	1700574	0.000932129
SWPan	JAPONICA	SNP-7.1702286.	7	1703286	0.000676129
SWPan	JAPONICA	SNP-7.1709145.	7	1710145	0.000816904
SWPan	JAPONICA	SNP-7.1759773.	7	1760773	0.000515255
SWPan	JAPONICA	SNP-7.1763533.	7	1764533	0.000809346
SWPan	JAPONICA	SNP-7.8797706.	7	8798702	0.000616044
SWPan	JAPONICA	SNP-7.9176768.	7	9177763	0.000957097
SWPan	JAPONICA	SNP-7.9543968.	7	9544963	0.000619656
SWPan	JAPONICA	SNP-7.12697905.	7	12698899	0.000797798
SWPan	JAPONICA	SNP-7.14193761.	7	14194755	0.000326454
SWPan	JAPONICA	SNP-7.14394017.	7	14395011	0.000467051
SWPan	JAPONICA	SNP-7.15039518.	7	15040512	0.000742406
SWPan	JAPONICA	SNP-7.23120337.	7	23121331	0.000139993
SWPan	JAPONICA	SNP-7.23146666.	7	23147660	0.000571123
SWPan	JAPONICA	SNP-7.23157697.	7	23158691	0.000237508
SWPan	JAPONICA	SNP-7.23282439.	7	23283433	0.000167745
SWPan	JAPONICA	SNP-7.23695028.	7	23696022	0.000645942
SWPan	JAPONICA	SNP-7.26645394.	7	26646389	0.000994526
SWPan	JAPONICA	SNP-8.1039439.	8	1040438	0.000831005
SWPan	JAPONICA	SNP-8.1951707.	8	1952705	0.000171653
SWPan	JAPONICA	SNP-8.2479960.	8	2480958	0.000499954
SWPan	JAPONICA	SNP-8.2493533.	8	2494531	0.000169675
SWPan	JAPONICA	SNP-8.2566456.	8	2567454	0.000768897
SWPan	JAPONICA	SNP-8.2614082.	8	2615080	0.000722566
SWPan	JAPONICA	SNP-8.2783900.	8	2784898	0.000125789
SWPan	JAPONICA	SNP-8.2784305.	8	2785303	9.06019e-05
SWPan	JAPONICA	SNP-8.2913248.	8	2914246	0.000118222
SWPan	JAPONICA	SNP-8.2914917.	8	2915915	0.000589386
SWPan	JAPONICA	SNP-8.2915604.	8	2916602	5.39671e-05
SWPan	JAPONICA	SNP-8.2921776.	8	2922774	2.9583e-05
SWPan	JAPONICA	SNP-8.2927803.	8	2928801	2.0991e-05
SWPan	JAPONICA	SNP-8.2941259.	8	2942257	6.44315e-06
SWPan	JAPONICA	SNP-8.3153692.	8	3154690	0.000350729
SWPan	JAPONICA	SNP-8.6216175.	8	6217171	0.00058078
SWPan	JAPONICA	SNP-8.6247113.	8	6248109	2.51788e-05
SWPan	JAPONICA	SNP-8.6434308.	8	6435304	0.000997685
SWPan	JAPONICA	SNP-8.7464253.	8	7465249	0.000987431
SWPan	JAPONICA	SNP-8.7884633.	8	7885630	0.000839942
SWPan	JAPONICA	SNP-8.17302252.	8	17304967	0.000727508
SWPan	JAPONICA	SNP-8.19770181.	8	19772895	0.000409091
SWPan	JAPONICA	SNP-8.20575545.	8	20578259	0.000488708
SWPan	JAPONICA	SNP-8.22035433.	8	22038147	0.000849284
SWPan	JAPONICA	SNP-8.22080793.	8	22083507	0.000433656
SWPan	JAPONICA	SNP-8.24045770.	8	24048485	0.000323643
SWPan	JAPONICA	SNP-9.7821809.	9	7822810	0.000997858
SWPan	JAPONICA	SNP-9.10394873.	9	10395875	0.000480879
SWPan	JAPONICA	SNP-9.10751002.	9	10752004	0.000940024
SWPan	JAPONICA	SNP-9.10887516.	9	10888518	0.000425543
SWPan	JAPONICA	SNP-9.10890908.	9	10891910	0.000205733
SWPan	JAPONICA	SNP-9.10898039.	9	10899041	0.000330506
SWPan	JAPONICA	SNP-9.17631275.	9	17632277	0.000206025
SWPan	JAPONICA	SNP-9.19348254.	9	19348665	0.000709195
SWPan	JAPONICA	SNP-9.22929766.	9	22930248	0.000635903
SWPan	JAPONICA	SNP-10.3226573.	10	3227597	0.000995842
SWPan	JAPONICA	SNP-10.7815954.	10	7800345	0.000354025
SWPan	JAPONICA	SNP-10.11310760.	10	11381942	0.0007167
SWPan	JAPONICA	SNP-10.11533191.	10	11604377	0.000245625
SWPan	JAPONICA	SNP-10.15180579.	10	15251812	0.000601784
SWPan	JAPONICA	SNP-10.21243375.	10	21314898	0.000569164
SWPan	JAPONICA	SNP-10.21363510.	10	21435034	0.000829267
SWPan	JAPONICA	SNP-10.21781643.	10	21853168	0.000280977
SWPan	JAPONICA	SNP-10.22625593.	10	22697120	0.000842368
SWPan	JAPONICA	SNP-10.22817119.	10	22888648	0.000555885
SWPan	JAPONICA	SNP-10.22862251.	10	22933780	0.000560063
SWPan	JAPONICA	SNP-11.10896562.	11	10902246	0.000454506
SWPan	JAPONICA	SNP-11.19235281.	11	19701594	0.000519155
SWPan	JAPONICA	SNP-11.26919684.	11	27391298	0.000477824
SWPan	JAPONICA	SNP-12.1528638.	12	1529639	0.00082174
SWPan	JAPONICA	SNP-12.3197537.	12	3198535	0.000823693
SWPan	JAPONICA	SNP-12.17288897.	12	17294943	0.000306323
SWPan	JAPONICA	SNP-12.22111855.	12	22145309	0.000571753

## Sheet: SeedWgt per plant
Trait	Subpopulation group	SNP-Name	Chromo-some	SNP position (bp)	p-value
SWPlt	JAPONICA	SNP-1.5073659.	1	5074660	0.000385877
SWPlt	JAPONICA	SNP-1.10675924.	1	10676949	7.38371e-06
SWPlt	JAPONICA	SNP-1.13805384.	1	13806411	0.000121566
SWPlt	JAPONICA	SNP-1.14614063.	1	14615090	0.000387274
SWPlt	JAPONICA	SNP-1.14723867.	1	14724894	0.000125483
SWPlt	JAPONICA	SNP-1.15599715.	1	15600742	4.0121e-06
SWPlt	JAPONICA	SNP-1.15886808.	1	15887835	9.46731e-05
SWPlt	JAPONICA	SNP-1.16676131.	1	16677158	0.000620314
SWPlt	JAPONICA	SNP-1.22237777.	1	22238823	0.000151121
SWPlt	JAPONICA	SNP-1.22271628.	1	22272674	0.000246456
SWPlt	JAPONICA	SNP-1.22286415.	1	22287461	0.00052367
SWPlt	JAPONICA	SNP-1.22906837.	1	22907882	0.000128041
SWPlt	JAPONICA	SNP-1.24198072.	1	24199117	0.00063324
SWPlt	JAPONICA	SNP-1.25580551.	1	25581596	0.000859072
SWPlt	JAPONICA	SNP-1.25611012.	1	25612057	0.000390302
SWPlt	JAPONICA	SNP-1.28726880.	1	28727926	0.00064864
SWPlt	JAPONICA	SNP-1.30101408.	1	30102454	0.000895492
SWPlt	JAPONICA	SNP-1.31904883.	1	31905928	0.000598179
SWPlt	JAPONICA	SNP-1.34321111.	1	34322155	0.000858666
SWPlt	JAPONICA	SNP-1.35743734.	1	35744778	0.000109802
SWPlt	JAPONICA	SNP-1.39018644.	1	39019688	0.000175087
SWPlt	JAPONICA	SNP-1.41510635.	1	41511679	5.60168e-05
SWPlt	JAPONICA	SNP-1.41553533.	1	41554577	3.28763e-05
SWPlt	JAPONICA	SNP-1.41742403.	1	41743447	0.000144364
SWPlt	JAPONICA	SNP-1.41745106.	1	41746150	1.73688e-05
SWPlt	JAPONICA	SNP-1.41751606.	1	41752650	1.1399e-05
SWPlt	JAPONICA	SNP-1.41761084.	1	41762128	6.49956e-06
SWPlt	JAPONICA	SNP-1.41761989.	1	41763033	6.01794e-06
SWPlt	JAPONICA	SNP-1.41764061.	1	41765105	8.81463e-05
SWPlt	JAPONICA	SNP-1.41764515.	1	41765559	0.000379323
SWPlt	JAPONICA	SNP-1.41775605.	1	41776649	0.000113347
SWPlt	JAPONICA	SNP-1.41776953.	1	41777997	0.000113347
SWPlt	JAPONICA	SNP-1.41779984.	1	41781028	0.000141939
SWPlt	JAPONICA	SNP-1.41781828.	1	41782872	7.26839e-05
SWPlt	JAPONICA	SNP-1.41810608.	1	41811652	1.70707e-05
SWPlt	JAPONICA	SNP-1.41813958.	1	41815002	3.56805e-05
SWPlt	JAPONICA	SNP-1.41815046.	1	41816090	8.85346e-05
SWPlt	JAPONICA	SNP-1.41820865.	1	41821909	0.000136742
SWPlt	JAPONICA	SNP-1.41826868.	1	41827912	0.000425099
SWPlt	JAPONICA	SNP-1.41842138.	1	41843182	0.000658674
SWPlt	JAPONICA	SNP-1.41843742.	1	41844786	8.01905e-05
SWPlt	JAPONICA	SNP-1.41846386.	1	41847430	4.47879e-05
SWPlt	JAPONICA	SNP-1.41850545.	1	41851589	0.000419322
SWPlt	JAPONICA	SNP-1.41856530.	1	41857574	4.65708e-05
SWPlt	JAPONICA	SNP-1.41859325.	1	41860369	4.03174e-06
SWPlt	JAPONICA	SNP-1.41860605.	1	41861649	6.66779e-08
SWPlt	JAPONICA	SNP-1.41861947.	1	41862991	1.03e-05
SWPlt	JAPONICA	SNP-1.41862485.	1	41863529	1.24142e-06
SWPlt	JAPONICA	SNP-1.41867665.	1	41868709	0.000126436
SWPlt	JAPONICA	SNP-1.41870342.	1	41871386	5.46878e-05
SWPlt	JAPONICA	SNP-1.41886996.	1	41888040	5.4651e-07
SWPlt	JAPONICA	SNP-1.41887303.	1	41888347	1.29409e-06
SWPlt	JAPONICA	SNP-1.41889803.	1	41890847	1.21305e-06
SWPlt	JAPONICA	SNP-1.41890331.	1	41891375	3.34072e-05
SWPlt	JAPONICA	SNP-1.41894714.	1	41895758	1.01973e-07
SWPlt	JAPONICA	SNP-1.41895014.	1	41896058	1.81219e-07
SWPlt	JAPONICA	SNP-1.41897831.	1	41898875	6.43654e-05
SWPlt	JAPONICA	SNP-1.41899908.	1	41900952	0.000312188
SWPlt	JAPONICA	SNP-1.41901830.	1	41902874	0.000142142
SWPlt	JAPONICA	SNP-1.41902752.	1	41903796	0.000941064
SWPlt	JAPONICA	SNP-1.41907332.	1	41908376	2.97704e-07
SWPlt	JAPONICA	SNP-1.41911497.	1	41912541	2.13153e-07
SWPlt	JAPONICA	SNP-1.41911519.	1	41912563	7.51349e-05
SWPlt	JAPONICA	SNP-1.41932388.	1	41933432	0.000221814
SWPlt	JAPONICA	SNP-1.41935006.	1	41936050	2.81245e-05
SWPlt	JAPONICA	SNP-1.41943834.	1	41944878	0.000957907
SWPlt	JAPONICA	SNP-1.41944362.	1	41945406	0.000381676
SWPlt	JAPONICA	SNP-1.41946951.	1	41947995	0.000614294
SWPlt	JAPONICA	SNP-1.41949485.	1	41950529	2.39789e-05
SWPlt	JAPONICA	SNP-1.41959629.	1	41960673	6.85561e-05
SWPlt	JAPONICA	SNP-1.41960427.	1	41961471	0.000768952
SWPlt	JAPONICA	SNP-1.41967616.	1	41968660	0.000949157
SWPlt	JAPONICA	SNP-1.41968676.	1	41969720	8.30869e-05
SWPlt	JAPONICA	SNP-1.41970453.	1	41971497	0.00048719
SWPlt	JAPONICA	SNP-1.41989911.	1	41990955	0.000947592
SWPlt	JAPONICA	SNP-1.41998191.	1	41999235	0.000657071
SWPlt	JAPONICA	SNP-1.42032023.	1	42033067	0.000341969
SWPlt	JAPONICA	SNP-1.42032601.	1	42033645	0.000410809
SWPlt	JAPONICA	SNP-1.42056063.	1	42057107	9.24792e-05
SWPlt	JAPONICA	SNP-1.42097715.	1	42098759	1.51586e-05
SWPlt	JAPONICA	SNP-1.42101682.	1	42102726	8.74266e-05
SWPlt	JAPONICA	SNP-1.42214101.	1	42215146	0.000156478
SWPlt	JAPONICA	SNP-1.42217215.	1	42218260	0.000313253
SWPlt	JAPONICA	SNP-1.42236428.	1	42237473	5.68186e-05
SWPlt	JAPONICA	SNP-1.42237588.	1	42238633	0.000296009
SWPlt	JAPONICA	SNP-1.42243170.	1	42244215	0.000660299
SWPlt	JAPONICA	SNP-1.42270925.	1	42271970	0.000559302
SWPlt	JAPONICA	SNP-1.42276481.	1	42277526	0.000898369
SWPlt	JAPONICA	SNP-1.42429428.	1	42430473	4.82381e-05
SWPlt	JAPONICA	SNP-1.42470982.	1	42472027	0.000907782
SWPlt	JAPONICA	SNP-2.1237624.	2	1237625	0.000205387
SWPlt	JAPONICA	SNP-2.4552081.	2	4552085	3.0177e-05
SWPlt	JAPONICA	SNP-2.4761404.	2	4761408	0.000785493
SWPlt	JAPONICA	SNP-2.4766666.	2	4766670	0.000984434
SWPlt	JAPONICA	SNP-2.4775934.	2	4775938	0.000989578
SWPlt	JAPONICA	SNP-2.5110283.	2	5110287	0.000406112
SWPlt	JAPONICA	SNP-2.5891944.	2	5891945	0.000233893
SWPlt	JAPONICA	SNP-2.8125710.	2	8125712	0.000291568
SWPlt	JAPONICA	SNP-2.9383781.	2	9383784	0.000428736
SWPlt	JAPONICA	SNP-2.13477998.	2	13478003	0.000119171
SWPlt	JAPONICA	SNP-2.14699573.	2	14705444	0.000711353
SWPlt	JAPONICA	SNP-2.18182602.	2	18188472	0.000579599
SWPlt	JAPONICA	SNP-2.20520312.	2	20526181	0.00049268
SWPlt	JAPONICA	SNP-2.21431233.	2	21437102	0.000530924
SWPlt	JAPONICA	SNP-2.21550089.	2	21555959	0.00032365
SWPlt	JAPONICA	SNP-2.21900384.	2	21906254	0.000481565
SWPlt	JAPONICA	SNP-2.22571059.	2	22576929	0.000764378
SWPlt	JAPONICA	SNP-2.23771305.	2	23777175	0.000978256
SWPlt	JAPONICA	SNP-2.23805351.	2	23811221	0.000664124
SWPlt	JAPONICA	SNP-2.23807020.	2	23812890	0.000542022
SWPlt	JAPONICA	SNP-2.24372313.	2	24378183	0.000858607
SWPlt	JAPONICA	SNP-2.24461645.	2	24467515	0.000653865
SWPlt	JAPONICA	SNP-2.24693642.	2	24699512	5.0306e-05
SWPlt	JAPONICA	SNP-2.24730813.	2	24736683	0.000503093
SWPlt	JAPONICA	SNP-2.24799290.	2	24805160	0.000614011
SWPlt	JAPONICA	SNP-2.25004165.	2	25010035	0.000703376
SWPlt	JAPONICA	SNP-2.25011095.	2	25016965	0.000219702
SWPlt	JAPONICA	SNP-2.25011421.	2	25017291	0.00091861
SWPlt	JAPONICA	SNP-2.25017153.	2	25023023	0.000613082
SWPlt	JAPONICA	SNP-2.25022305ga.	2	25028175	0.000340601
SWPlt	JAPONICA	SNP-2.25023539.	2	25029409	0.000306747
SWPlt	JAPONICA	SNP-2.25035145.	2	25041015	0.000283579
SWPlt	JAPONICA	SNP-2.25041799.	2	25047669	0.000872607
SWPlt	JAPONICA	SNP-2.25868661.	2	25874531	0.000903591
SWPlt	JAPONICA	SNP-2.26002971.	2	26008841	0.000928934
SWPlt	JAPONICA	SNP-2.28041081.	2	28046951	0.00012122
SWPlt	JAPONICA	SNP-2.28611605.	2	28617475	0.000651477
SWPlt	JAPONICA	SNP-2.32245654.	2	32251524	0.000113374
SWPlt	JAPONICA	SNP-2.33606044.	2	33611914	0.00038913
SWPlt	JAPONICA	SNP-3.1737995.	3	1739000	0.000624533
SWPlt	JAPONICA	SNP-3.2050854.	3	2051859	0.000393743
SWPlt	JAPONICA	SNP-3.2974550.	3	2975555	7.21423e-05
SWPlt	JAPONICA	SNP-3.3007890.	3	3008895	3.34633e-05
SWPlt	JAPONICA	SNP-3.3676038.	3	3677043	0.000747697
SWPlt	JAPONICA	SNP-3.4134044.	3	4135043	8.05242e-05
SWPlt	JAPONICA	SNP-3.4528534.	3	4529533	1.24324e-06
SWPlt	JAPONICA	SNP-3.4538073.	3	4539072	4.32027e-07
SWPlt	JAPONICA	SNP-3.4802517.	3	4803516	0.000318834
SWPlt	JAPONICA	SNP-3.4918203.	3	4919202	0.000363637
SWPlt	JAPONICA	SNP-3.6480696.	3	6481697	0.000151927
SWPlt	JAPONICA	SNP-3.6849442.	3	6850443	0.000276418
SWPlt	JAPONICA	SNP-3.6945409.	3	6946412	0.000650393
SWPlt	JAPONICA	SNP-3.7232909.	3	7233912	0.00031673
SWPlt	JAPONICA	SNP-3.7581146.	3	7582209	3.69731e-05
SWPlt	JAPONICA	SNP-3.8872842.	3	8873905	0.000768404
SWPlt	JAPONICA	SNP-3.12268440.	3	12269723	0.000547153
SWPlt	JAPONICA	SNP-3.12385162.	3	12386445	0.000747786
SWPlt	JAPONICA	SNP-3.12624099.	3	12625382	0.000812629
SWPlt	JAPONICA	SNP-3.14078244.	3	14079556	0.000198887
SWPlt	JAPONICA	SNP-3.25314906.	3	25316826	0.000466171
SWPlt	JAPONICA	SNP-3.33069808.	3	33076939	0.000727016
SWPlt	JAPONICA	SNP-3.35758957.	3	35766089	0.000863881
SWPlt	JAPONICA	SNP-4.1325121.	4	1329572	0.000378978
SWPlt	JAPONICA	SNP-4.2743436.	4	2747832	0.000968497
SWPlt	JAPONICA	SNP-4.6133590.	4	6138151	0.00080291
SWPlt	JAPONICA	SNP-4.7231903.	4	7236634	0.000480615
SWPlt	JAPONICA	SNP-4.11104435.	4	11113735	0.00074728
SWPlt	JAPONICA	SNP-4.11684841.	4	11694135	8.92606e-05
SWPlt	JAPONICA	SNP-4.14062824.	4	14072110	0.000880844
SWPlt	JAPONICA	SNP-4.17077337.	4	17249297	0.000626772
SWPlt	JAPONICA	SNP-4.17081681.	4	17253641	0.000227269
SWPlt	JAPONICA	SNP-4.17094445.	4	17266405	7.77883e-05
SWPlt	JAPONICA	SNP-4.17207246.	4	17379204	3.22521e-05
SWPlt	JAPONICA	SNP-4.17314378.	4	17486337	0.000110336
SWPlt	JAPONICA	SNP-4.17667555.	4	17839516	0.000219513
SWPlt	JAPONICA	SNP-4.20034979.	4	20206935	0.000378995
SWPlt	JAPONICA	SNP-4.20035434.	4	20207390	0.000120351
SWPlt	JAPONICA	SNP-4.20530771.	4	20702729	0.000497096
SWPlt	JAPONICA	SNP-4.20546273.	4	20718231	0.00034848
SWPlt	JAPONICA	SNP-4.20549400.	4	20721358	0.00083721
SWPlt	JAPONICA	SNP-4.20553580.	4	20725538	0.000510422
SWPlt	JAPONICA	SNP-4.20554744.	4	20726702	0.000769685
SWPlt	JAPONICA	SNP-4.20563977.	4	20735935	0.000473662
SWPlt	JAPONICA	SNP-4.21742224.	4	21914174	0.000413794
SWPlt	JAPONICA	SNP-4.23628359.	4	23813503	0.000803202
SWPlt	JAPONICA	SNP-4.23950685.	4	24135825	0.000954653
SWPlt	JAPONICA	SNP-4.30012410.	4	30197539	0.000406336
SWPlt	JAPONICA	SNP-4.31077850.	4	31262961	0.00061787
SWPlt	JAPONICA	SNP-4.33426566.	4	33611684	0.000167272
SWPlt	JAPONICA	SNP-4.33582666.	4	33767787	0.000611645
SWPlt	JAPONICA	SNP-4.33932031.	4	34117136	0.000300424
SWPlt	JAPONICA	SNP-5.155244.	5	155245	0.000600989
SWPlt	JAPONICA	SNP-5.5528648.	5	5528711	4.30017e-05
SWPlt	JAPONICA	SNP-5.6843229.	5	6843288	0.000306648
SWPlt	JAPONICA	SNP-5.7299349.	5	7299408	0.000927932
SWPlt	JAPONICA	SNP-5.8507891.	5	8507964	0.000185574
SWPlt	JAPONICA	SNP-5.8584500.	5	8584573	0.000984604
SWPlt	JAPONICA	SNP-5.8685522.	5	8685595	1.44073e-05
SWPlt	JAPONICA	SNP-5.8838162.	5	8838235	0.000436418
SWPlt	JAPONICA	SNP-5.9317609.	5	9317681	0.000423972
SWPlt	JAPONICA	SNP-5.10337038.	5	10337110	0.000612542
SWPlt	JAPONICA	SNP-5.11477899.	5	11477970	0.000104968
SWPlt	JAPONICA	SNP-5.11704728.	5	11704799	0.000394802
SWPlt	JAPONICA	SNP-5.12049620.	5	12049691	0.000636826
SWPlt	JAPONICA	SNP-5.12149836.	5	12149907	0.000147108
SWPlt	JAPONICA	SNP-5.12684405.	5	12741484	0.000643626
SWPlt	JAPONICA	SNP-5.12865699.	5	12922778	0.00082749
SWPlt	JAPONICA	SNP-5.13236554.	5	13293633	0.000574668
SWPlt	JAPONICA	SNP-5.13381613.	5	13439067	0.000374909
SWPlt	JAPONICA	SNP-5.13515893.	5	13573347	0.000907256
SWPlt	JAPONICA	SNP-5.13521889.	5	13579343	0.000739712
SWPlt	JAPONICA	SNP-5.13803808.	5	13861265	0.000767012
SWPlt	JAPONICA	SNP-5.14008223.	5	14065680	0.000909385
SWPlt	JAPONICA	SNP-5.14111351.	5	14168808	0.000157878
SWPlt	JAPONICA	SNP-5.14154588.	5	14212046	0.000367827
SWPlt	JAPONICA	SNP-5.14432445.	5	14489903	0.00018766
SWPlt	JAPONICA	SNP-5.15444289.	5	15501749	6.38129e-05
SWPlt	JAPONICA	SNP-5.15528948.	5	15586408	0.000908308
SWPlt	JAPONICA	SNP-5.15866283.	5	15923777	8.99915e-05
SWPlt	JAPONICA	SNP-5.17181487.	5	17241846	1.47574e-05
SWPlt	JAPONICA	SNP-5.17218734.	5	17279092	0.000272969
SWPlt	JAPONICA	SNP-5.19664903.	5	19727420	0.000370082
SWPlt	JAPONICA	SNP-5.19829472.	5	19891997	0.000115672
SWPlt	JAPONICA	SNP-5.20070035.	5	20132563	0.000877321
SWPlt	JAPONICA	SNP-5.20345401.	5	20407930	0.000875121
SWPlt	JAPONICA	SNP-5.21232295.	5	21294855	0.000254808
SWPlt	JAPONICA	SNP-5.21811729.	5	21874288	0.000103485
SWPlt	JAPONICA	SNP-5.22745102.	5	22807661	0.000407395
SWPlt	JAPONICA	SNP-5.25069666.	5	25132246	0.000630629
SWPlt	JAPONICA	SNP-5.25173603.	5	25236183	0.000623699
SWPlt	JAPONICA	SNP-5.26346272.	5	26408910	0.000230755
SWPlt	JAPONICA	SNP-5.26772597.	5	26835240	1.23237e-05
SWPlt	JAPONICA	SNP-5.26794942.	5	26857585	7.81905e-05
SWPlt	JAPONICA	SNP-5.26926106.	5	26988751	0.000540984
SWPlt	JAPONICA	SNP-5.26956076.	5	27018721	0.000468123
SWPlt	JAPONICA	SNP-5.26994659.	5	27057304	0.00037064
SWPlt	JAPONICA	SNP-5.27058657.	5	27121302	0.000361091
SWPlt	JAPONICA	SNP-5.27120128.	5	27182773	0.000969074
SWPlt	JAPONICA	SNP-5.27132426.	5	27195071	1.36835e-05
SWPlt	JAPONICA	SNP-5.27140646.	5	27203291	0.000452636
SWPlt	JAPONICA	SNP-5.27142023.	5	27204668	0.00013455
SWPlt	JAPONICA	SNP-5.27282116.	5	27344761	0.000184275
SWPlt	JAPONICA	SNP-6.5388785.	6	5389785	2.73475e-06
SWPlt	JAPONICA	SNP-6.6192945.	6	6193945	0.000489001
SWPlt	JAPONICA	SNP-6.15164100.	6	15165100	0.000542396
SWPlt	JAPONICA	SNP-6.15905944.	6	15906943	0.000669877
SWPlt	JAPONICA	SNP-6.17654737.	6	17655735	2.80641e-05
SWPlt	JAPONICA	SNP-6.18854679.	6	18855677	9.5539e-05
SWPlt	JAPONICA	SNP-6.18964999.	6	18965997	0.000217228
SWPlt	JAPONICA	SNP-6.18991623.	6	18992621	0.000199012
SWPlt	JAPONICA	SNP-6.19105506.	6	19106504	0.000808109
SWPlt	JAPONICA	SNP-6.19113754.	6	19114752	0.000462238
SWPlt	JAPONICA	SNP-6.19235161.	6	19236159	0.00075831
SWPlt	JAPONICA	SNP-6.19499408.	6	19500406	0.00092913
SWPlt	JAPONICA	SNP-6.19576313.	6	19577311	0.000610211
SWPlt	JAPONICA	SNP-6.20042911.	6	20043909	0.000762789
SWPlt	JAPONICA	SNP-6.20525624.	6	20526622	0.000302955
SWPlt	JAPONICA	SNP-6.21222437.	6	21223435	0.000347072
SWPlt	JAPONICA	SNP-6.23236276.	6	23237274	0.000861276
SWPlt	JAPONICA	SNP-6.23316616.	6	23317614	1.96379e-06
SWPlt	JAPONICA	SNP-6.23455666.	6	23456664	0.000530335
SWPlt	JAPONICA	SNP-6.23935587.	6	23936585	0.000199798
SWPlt	JAPONICA	SNP-6.24392228.	6	24393226	0.000813354
SWPlt	JAPONICA	SNP-6.24417621.	6	24418619	0.000823627
SWPlt	JAPONICA	SNP-6.24441336.	6	24442334	0.000388379
SWPlt	JAPONICA	SNP-6.24486429.	6	24487427	0.000742995
SWPlt	JAPONICA	SNP-6.24581933.	6	24582931	0.000706402
SWPlt	JAPONICA	SNP-6.24617212.	6	24618210	0.000668
SWPlt	JAPONICA	SNP-6.24630858.	6	24631856	0.000278861
SWPlt	JAPONICA	SNP-6.24649564.	6	24650562	0.000596967
SWPlt	JAPONICA	SNP-6.24710133.	6	24711131	2.96471e-05
SWPlt	JAPONICA	SNP-6.24748323.	6	24749321	0.000266157
SWPlt	JAPONICA	SNP-6.25368591.	6	25369589	0.00038721
SWPlt	JAPONICA	SNP-6.28169333.	6	28170332	0.000649297
SWPlt	JAPONICA	SNP-6.28496649.	6	28497648	0.000179323
SWPlt	JAPONICA	SNP-6.28906594.	6	28907593	0.000429341
SWPlt	JAPONICA	SNP-6.28955166.	6	28956165	0.000565438
SWPlt	JAPONICA	SNP-6.29077476.	6	29078475	0.000355318
SWPlt	JAPONICA	SNP-6.30114955.	6	30115954	0.000649856
SWPlt	JAPONICA	SNP-7.3740242.	7	3741242	5.1386e-05
SWPlt	JAPONICA	SNP-7.5135815.	7	5136815	7.74803e-05
SWPlt	JAPONICA	SNP-7.8388323.	7	8389319	0.000201158
SWPlt	JAPONICA	SNP-7.8741608.	7	8742604	0.000989326
SWPlt	JAPONICA	SNP-7.9458807.	7	9459802	0.00019744
SWPlt	JAPONICA	SNP-7.11884600.	7	11885595	3.41528e-06
SWPlt	JAPONICA	SNP-7.12350124.	7	12351118	0.000426799
SWPlt	JAPONICA	SNP-7.12358698at.	7	12359692	0.000274262
SWPlt	JAPONICA	SNP-7.15904093.	7	15905087	7.34066e-05
SWPlt	JAPONICA	SNP-7.22176473.	7	22177467	0.000238395
SWPlt	JAPONICA	SNP-7.23120337.	7	23121331	0.000400413
SWPlt	JAPONICA	SNP-7.23146666.	7	23147660	0.000884073
SWPlt	JAPONICA	SNP-7.23157697.	7	23158691	0.000257328
SWPlt	JAPONICA	SNP-7.23196196.	7	23197190	3.5419e-05
SWPlt	JAPONICA	SNP-7.23282137.	7	23283131	8.0552e-05
SWPlt	JAPONICA	SNP-7.23282439.	7	23283433	0.000105855
SWPlt	JAPONICA	SNP-7.23289350.	7	23290344	0.000350746
SWPlt	JAPONICA	SNP-7.23409894.	7	23410888	0.000298712
SWPlt	JAPONICA	SNP-7.23971348.	7	23972343	0.000893974
SWPlt	JAPONICA	SNP-7.25958657.	7	25959652	0.000467045
SWPlt	JAPONICA	SNP-7.29485454.	7	29486447	4.10733e-05
SWPlt	JAPONICA	SNP-8.120448.	8	121449	0.000127911
SWPlt	JAPONICA	SNP-8.120452.	8	121453	6.31675e-08
SWPlt	JAPONICA	SNP-8.324831.	8	325832	0.000228231
SWPlt	JAPONICA	SNP-8.539268.	8	540269	0.000973571
SWPlt	JAPONICA	SNP-8.612906.	8	613907	7.54608e-06
SWPlt	JAPONICA	SNP-8.627784.	8	628785	1.74316e-07
SWPlt	JAPONICA	SNP-8.686890.	8	687891	2.39417e-08
SWPlt	JAPONICA	SNP-8.772201.	8	773200	1.05255e-07
SWPlt	JAPONICA	SNP-8.789446.	8	790445	2.98873e-07
SWPlt	JAPONICA	SNP-8.844438.	8	845437	3.23644e-08
SWPlt	JAPONICA	SNP-8.885599.	8	886598	2.85806e-09
SWPlt	JAPONICA	SNP-8.934993.	8	935992	2.82212e-05
SWPlt	JAPONICA	SNP-8.1039439.	8	1040438	5.62062e-05
SWPlt	JAPONICA	SNP-8.1292551.	8	1293550	0.000505083
SWPlt	JAPONICA	SNP-8.1665684.	8	1666683	0.00049229
SWPlt	JAPONICA	SNP-8.2493533.	8	2494531	2.2693e-05
SWPlt	JAPONICA	SNP-8.2614082.	8	2615080	0.000870868
SWPlt	JAPONICA	SNP-8.2829895.	8	2830893	3.13358e-05
SWPlt	JAPONICA	SNP-8.2941259.	8	2942257	5.10518e-05
SWPlt	JAPONICA	SNP-8.3019077.	8	3020075	0.00054031
SWPlt	JAPONICA	SNP-8.3332892.	8	3333890	0.000608018
SWPlt	JAPONICA	SNP-8.3368176.	8	3369174	5.27382e-05
SWPlt	JAPONICA	SNP-8.3456193.	8	3457191	0.000140008
SWPlt	JAPONICA	SNP-8.3644533.	8	3645531	9.54946e-05
SWPlt	JAPONICA	SNP-8.3685552.	8	3686550	0.000428437
SWPlt	JAPONICA	SNP-8.3698410.	8	3699408	0.000924051
SWPlt	JAPONICA	SNP-8.3729167.	8	3730165	0.000924181
SWPlt	JAPONICA	SNP-8.3733749.	8	3734747	0.000383803
SWPlt	JAPONICA	SNP-8.3737606.	8	3738604	0.00017364
SWPlt	JAPONICA	SNP-8.3762163.	8	3763161	5.81572e-05
SWPlt	JAPONICA	SNP-8.4501376.	8	4502374	0.000275883
SWPlt	JAPONICA	SNP-8.4587333.	8	4588331	2.62134e-06
SWPlt	JAPONICA	SNP-8.4624490.	8	4625488	4.78543e-05
SWPlt	JAPONICA	SNP-8.5039694.	8	5040692	5.15813e-05
SWPlt	JAPONICA	SNP-8.5284704.	8	5285702	0.000178606
SWPlt	JAPONICA	SNP-8.5285356.	8	5286354	0.000504682
SWPlt	JAPONICA	SNP-8.6208045.	8	6209041	0.000414254
SWPlt	JAPONICA	SNP-8.6212369.	8	6213365	0.000632051
SWPlt	JAPONICA	SNP-8.6216175.	8	6217171	0.000930681
SWPlt	JAPONICA	SNP-8.6239824.	8	6240820	0.000776692
SWPlt	JAPONICA	SNP-8.6247113.	8	6248109	3.19623e-05
SWPlt	JAPONICA	SNP-8.6254512.	8	6255508	0.000891083
SWPlt	JAPONICA	SNP-8.6256006.	8	6257002	0.000676222
SWPlt	JAPONICA	SNP-8.6269223.	8	6270219	1.61984e-05
SWPlt	JAPONICA	SNP-8.6434308.	8	6435304	0.000658542
SWPlt	JAPONICA	SNP-8.7464253.	8	7465249	0.000167378
SWPlt	JAPONICA	SNP-8.7884633.	8	7885630	1.30309e-08
SWPlt	JAPONICA	SNP-8.8448174.	8	8449171	0.000938937
SWPlt	JAPONICA	SNP-8.8605283.	8	8606280	0.00028877
SWPlt	JAPONICA	SNP-8.14034387.	8	14037102	0.000262294
SWPlt	JAPONICA	SNP-8.14784691.	8	14787406	0.000699396
SWPlt	JAPONICA	SNP-8.16380096.	8	16382811	0.000609588
SWPlt	JAPONICA	SNP-8.16508820.	8	16511535	0.000420235
SWPlt	JAPONICA	SNP-8.18521811.	8	18524525	0.000887481
SWPlt	JAPONICA	SNP-8.19196742.	8	19199456	0.000546928
SWPlt	JAPONICA	SNP-8.19864209.	8	19866923	0.000681826
SWPlt	JAPONICA	SNP-8.20575545.	8	20578259	0.000663604
SWPlt	JAPONICA	SNP-8.24045770.	8	24048485	0.0004537
SWPlt	JAPONICA	SNP-8.25560791.	8	25563506	0.000149004
SWPlt	JAPONICA	SNP-8.26763340.	8	26766055	0.000947334
SWPlt	JAPONICA	SNP-8.26803603.	8	26806318	0.000294777
SWPlt	JAPONICA	SNP-8.26805511.	8	26808226	0.000128231
SWPlt	JAPONICA	SNP-8.26806643.	8	26809358	0.000133544
SWPlt	JAPONICA	SNP-8.26808476.	8	26811191	0.000121403
SWPlt	JAPONICA	SNP-8.26880453.	8	26883168	0.000296229
SWPlt	JAPONICA	SNP-8.26988759.	8	26991474	0.000994533
SWPlt	JAPONICA	SNP-8.27734248.	8	27736963	0.000294458
SWPlt	JAPONICA	SNP-8.27972578.	8	27975293	0.000419797
SWPlt	JAPONICA	SNP-8.27996822.	8	27999537	0.000481711
SWPlt	JAPONICA	SNP-8.28000780.	8	28003495	0.00013696
SWPlt	JAPONICA	SNP-8.28015444.	8	28018159	9.09261e-05
SWPlt	JAPONICA	SNP-8.28015773.	8	28018488	0.00073385
SWPlt	JAPONICA	SNP-8.28016454.	8	28019169	0.000165112
SWPlt	JAPONICA	SNP-8.28041662.	8	28044377	0.000468421
SWPlt	JAPONICA	SNP-8.28056729.	8	28059444	0.000630535
SWPlt	JAPONICA	SNP-8.28057171.	8	28059886	0.000328054
SWPlt	JAPONICA	SNP-8.28057403.	8	28060118	0.000419797
SWPlt	JAPONICA	SNP-8.28059035.	8	28061750	0.000630535
SWPlt	JAPONICA	SNP-8.28060162.	8	28062877	0.00055658
SWPlt	JAPONICA	SNP-8.28066229.	8	28068944	0.00023598
SWPlt	JAPONICA	SNP-8.28068320.	8	28071035	0.00017298
SWPlt	JAPONICA	SNP-8.28074434.	8	28077149	0.000676172
SWPlt	JAPONICA	SNP-8.28082056.	8	28084771	0.000452411
SWPlt	JAPONICA	SNP-8.28082241.	8	28084956	0.000857573
SWPlt	JAPONICA	SNP-8.28101823.	8	28104538	0.000628709
SWPlt	JAPONICA	SNP-9.632359.	9	633360	0.000205097
SWPlt	JAPONICA	SNP-9.1832370.	9	1833371	0.000685733
SWPlt	JAPONICA	SNP-9.3903877.	9	3904878	0.000965393
SWPlt	JAPONICA	SNP-9.10394873.	9	10395875	0.00087867
SWPlt	JAPONICA	SNP-9.10887516.	9	10888518	0.000611952
SWPlt	JAPONICA	SNP-9.13562684.	9	13563686	0.000927299
SWPlt	JAPONICA	SNP-9.13675088.	9	13676090	0.000920649
SWPlt	JAPONICA	SNP-9.15785634.	9	15786636	0.000903945
SWPlt	JAPONICA	SNP-9.15868832.	9	15869834	0.000797785
SWPlt	JAPONICA	SNP-9.16106774.	9	16107776	0.000497256
SWPlt	JAPONICA	SNP-9.16539210.	9	16540212	0.000127161
SWPlt	JAPONICA	SNP-9.16582304.	9	16583306	0.000859309
SWPlt	JAPONICA	SNP-9.16591255.	9	16592257	0.000602896
SWPlt	JAPONICA	SNP-9.16601788.	9	16602790	0.000165912
SWPlt	JAPONICA	SNP-9.16607286.	9	16608288	0.000831199
SWPlt	JAPONICA	SNP-9.16677173.	9	16678175	0.000244037
SWPlt	JAPONICA	SNP-9.22468223.	9	22468705	5.14889e-05
SWPlt	JAPONICA	SNP-10.58961.	10	59962	1.7257e-05
SWPlt	JAPONICA	SNP-10.9629832.	10	9701012	4.29895e-05
SWPlt	JAPONICA	SNP-10.14575094.	10	14646329	1.26236e-05
SWPlt	JAPONICA	SNP-10.17011311.	10	17082540	2.87127e-05
SWPlt	JAPONICA	SNP-10.17103349.	10	17174577	3.91098e-05
SWPlt	JAPONICA	SNP-10.17214024.	10	17285252	0.000660927
SWPlt	JAPONICA	SNP-10.18163920.	10	18235363	0.000496263
SWPlt	JAPONICA	SNP-10.18354572.	10	18426016	3.46434e-05
SWPlt	JAPONICA	SNP-10.19055955.	10	19127399	0.000921791
SWPlt	JAPONICA	SNP-10.19262261.	10	19333707	0.000256598
SWPlt	JAPONICA	SNP-11.6250693.	11	6254942	0.000854512
SWPlt	JAPONICA	SNP-11.6499466.	11	6503715	0.000450935
SWPlt	JAPONICA	SNP-11.6643246.	11	6647494	0.000287429
SWPlt	JAPONICA	SNP-11.7259476.	11	7263732	1.43582e-06
SWPlt	JAPONICA	SNP-11.7273641.	11	7277897	0.00040401
SWPlt	JAPONICA	SNP-11.8000782.	11	8005038	2.58731e-05
SWPlt	JAPONICA	SNP-11.8164338.	11	8168594	0.000172768
SWPlt	JAPONICA	SNP-11.8257435.	11	8262826	0.000468541
SWPlt	JAPONICA	SNP-11.8493092.	11	8498483	0.000641881
SWPlt	JAPONICA	SNP-11.8493311.	11	8498702	1.13503e-06
SWPlt	JAPONICA	SNP-11.9020401.	11	9025789	0.00031083
SWPlt	JAPONICA	SNP-11.12944312.	11	13407991	0.000677082
SWPlt	JAPONICA	SNP-11.14803078.	11	15266765	0.000850147
SWPlt	JAPONICA	SNP-11.17642603.	11	18108746	0.000925697
SWPlt	JAPONICA	SNP-11.21835478.	11	22301608	8.38674e-05
SWPlt	JAPONICA	SNP-11.24924166.	11	25390328	0.000606583
SWPlt	JAPONICA	SNP-11.25214007.	11	25680169	0.000212256
SWPlt	JAPONICA	SNP-11.25747420.	11	26219007	0.000320622
SWPlt	JAPONICA	SNP-11.27513094.	11	27984709	0.000740284
SWPlt	JAPONICA	SNP-11.27562297.	11	28033912	0.0003339
SWPlt	JAPONICA	SNP-11.27571625.	11	28094833	0.000604543
SWPlt	JAPONICA	SNP-11.28223990.	11	28747212	0.00077806
SWPlt	JAPONICA	SNP-12.154931.	12	155932	0.000360135
SWPlt	JAPONICA	SNP-12.6678986.	12	6680097	0.000638877
SWPlt	JAPONICA	SNP-12.7943184.	12	7945779	0.000438407
SWPlt	JAPONICA	SNP-12.10477712.	12	10480300	0.000557554
SWPlt	JAPONICA	SNP-12.10602285.	12	10604873	0.000570986
SWPlt	JAPONICA	SNP-12.11359856.	12	11362521	0.000948053
SWPlt	JAPONICA	SNP-12.11377314.	12	11379979	0.000557561
SWPlt	JAPONICA	SNP-12.14603088.	12	14605749	0.000491675
SWPlt	JAPONICA	SNP-12.19613716.	12	19642247	0.000684922
SWPlt	JAPONICA	SNP-12.21227604.	12	21261059	2.56061e-05
SWPlt	JAPONICA	SNP-12.22773387.	12	22806949	0.000864586
SWPlt	JAPONICA	SNP-12.24881054.	12	24914601	0.00017141
SWPlt	JAPONICA	SNP-12.25637367.	12	25670973	0.000189532
SWPlt	JAPONICA	SNP-12.26082998.	12	26116605	0.000778656
SWPlt	JAPONICA	SNP-12.26087497.	12	26121104	0.000110649
SWPlt	JAPONICA	SNP-12.26087515.	12	26121122	0.000173646
SWPlt	JAPONICA	SNP-12.26089033.	12	26122640	6.82057e-05
SWPlt	JAPONICA	SNP-12.26092211.	12	26125818	0.000929272
SWPlt	JAPONICA	SNP-12.26096348.	12	26129955	0.000911334
