# Supplementary material
Source: publisher figshare collection journal article supplement (https://plos.figshare.com/articles/dataset/_/4744111)
Supplement: Supplementary file 1 [file 1 › S2 Fig.pdf]

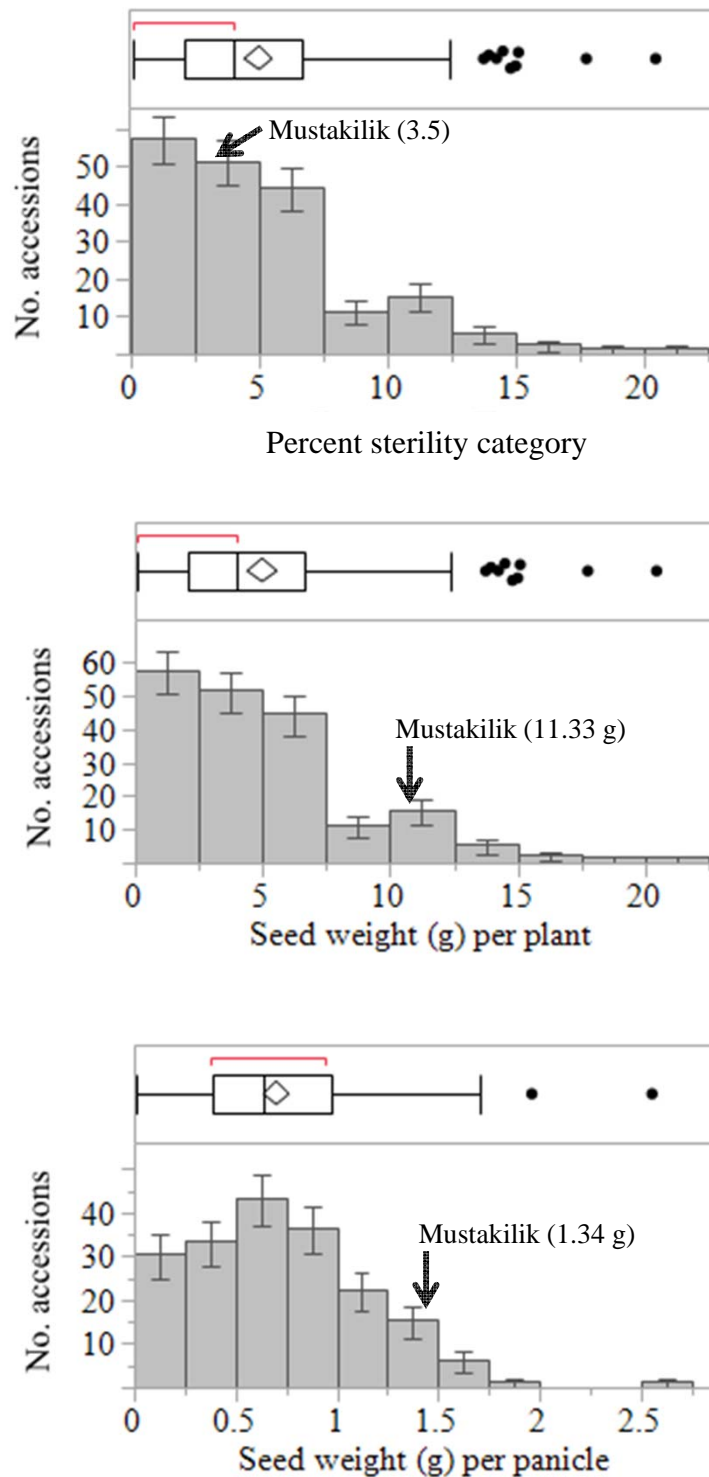

**S2 Fig. Distribution of the 189 *JAPONICA* RDP1 accessions for three reproductive traits as a measure of cold tolerance at booting.** The distribution of the mean percent sterility [classified as category 1 (0-5% sterility), 2 (6-12%), 3 (13-18%), 4 (19-40%), 5 (41 to 60%), 6 (61 to 90%) and 7 (91 to 100%)], mean seed weight per panicle and mean seed weight per plant as a measure of cold tolerance at booting (panicle emergence) in rice. Quantile box-and-whisker plots show the distribution of observed values and the mean for each trait. The value for cold tolerant check, Mustakilik, shown. (Table 1 lists additional statistics.)
