# Supplementary material
Source: publisher figshare collection journal article supplement (https://plos.figshare.com/articles/dataset/_/4744111)
Supplement: Supplementary file 1 [file 1 › S2 Table.pdf]

**S2 Table. List of the RDP1 accessions which were cold tolerant at germination.** The 83 accessions listed had a germination index at least one standard error above the cold tolerant control, Quilla66304. (The three controls replicated across this experiment are listed at the end of the table.)

| Rank | Accession <sup>1)</sup>  | Germination index <sup>2), 3)</sup> | Subpopulation group <sup>4)</sup> | Subspecies | Original providing country <sup>4)</sup> | Region/Originating country |
|------|--------------------------|-------------------------------------|-----------------------------------|------------|------------------------------------------|----------------------------|
| 1    | NPE 835                  | 2.67                                | <i>temperate japonica</i>         | JAPONICA   | Pakistan                                 | South Asia                 |
| 2    | Haginomae Mochi          | 1.71                                | <i>temperate japonica</i>         | JAPONICA   | Japan                                    | East Asia                  |
| 3    | Llanero 501              | 1.17                                | <i>tropical japonica</i>          | JAPONICA   | Zaire                                    | South America              |
| 4    | Li-Jiang-Xin-Tuan-Hei-Gu | 1.10                                | <i>temperate japonica</i>         | JAPONICA   | China                                    | East Asia                  |
| 5    | Romeo                    | 1.08                                | <i>temperate japonica</i>         | JAPONICA   | Italy                                    | West Europe                |
| 6    | Triomphe Du Maroc        | 1.06                                | <i>temperate japonica</i>         | JAPONICA   | Morocco                                  | Africa                     |
| 7    | Edith                    | 1.05                                | <i>tropical japonica</i>          | JAPONICA   | United States                            | North America              |
| 8    | Karabaschak              | 1.05                                | <i>temperate japonica</i>         | JAPONICA   | Bulgaria                                 | East Europe                |
| 9    | Early                    | 1.03                                | <i>admixed-japonica</i>           | JAPONICA   | China                                    | North America              |
| 10   | LaGrue                   | 1.03                                | <i>tropical japonica</i>          | JAPONICA   | United States                            | North America              |
| 11   | M-202                    | 1.03                                | <i>temperate japonica</i>         | JAPONICA   | United States                            | North America              |
| 12   | Baber                    | 1.02                                | <i>temperate japonica</i>         | JAPONICA   | India                                    | South Asia                 |
| 13   | 318                      | 1.02                                | <i>tropical japonica</i>          | JAPONICA   | India                                    | West Asia                  |
| 14   | Kinastano                | 1.02                                | <i>tropical japonica</i>          | JAPONICA   | Philippines                              | Southeast Asia             |
| 15   | Jambu                    | 1.02                                | <i>tropical japonica</i>          | JAPONICA   | Indonesia                                | Southeast Asia             |
| 16   | TKM6                     | 1.01                                | <i>indica</i>                     | INDICA     | India                                    | South Asia                 |
| 17   | Niquen                   | 1.01                                | <i>temperate japonica</i>         | JAPONICA   | Chile                                    | South America              |
| 18   | Spring                   | 1.01                                | <i>tropical japonica</i>          | JAPONICA   | United States                            | North America              |
| 19   | Padi Pagalong            | 1.00                                | <i>tropical japonica</i>          | JAPONICA   | Malaysia                                 | Southeast Asia             |
| 20   | Kibi                     | 1.00                                | <i>temperate japonica</i>         | JAPONICA   | Japan                                    | East Asia                  |
| 21   | NSF-TV 107               | 1.00                                | <i>tropical japonica</i>          | JAPONICA   | Unknown                                  | Unknown                    |
| 22   | Priano Guaira            | 1.00                                | <i>tropical japonica</i>          | JAPONICA   | Brazil                                   | South America              |
| 23   | Manzano                  | 1.00                                | <i>tropical japonica</i>          | JAPONICA   | Zaire                                    | Africa                     |
| 24   | Bengal                   | 1.00                                | <i>admixed-japonica</i>           | JAPONICA   | United States                            | North America              |
| 25   | Saber                    | 1.00                                | <i>tropical japonica</i>          | JAPONICA   | United States                            | North America              |
| 26   | Chinese                  | 0.99                                | <i>temperate japonica</i>         | JAPONICA   | China                                    | East Asia                  |
| 27   | Luk Takhar               | 0.99                                | <i>temperate japonica</i>         | JAPONICA   | Afghanistan                              | South Asia                 |
| 28   | Guineandao               | 0.99                                | <i>admixed-japonica</i>           | JAPONICA   | Guinea                                   | Africa                     |
| 29   | Pate Blanc Mn 1          | 0.98                                | <i>tropical japonica</i>          | JAPONICA   | Cote D'Ivoire                            | Africa                     |

|    |                                |      |                           |          |                           |                 |
|----|--------------------------------|------|---------------------------|----------|---------------------------|-----------------|
| 30 | 325                            | 0.98 | <i>tropical japonica</i>  | JAPONICA | Taiwan                    | East Asia       |
| 31 | Carolina Gold 12034            | 0.98 | <i>tropical japonica</i>  | JAPONICA | United States             | North America   |
| 32 | Taipei 309                     | 0.98 | <i>temperate japonica</i> | JAPONICA | Taiwan                    | East Asia       |
| 33 | Wells                          | 0.98 | <i>tropical japonica</i>  | JAPONICA | United States             | North America   |
| 34 | British Honduras Creole        | 0.97 | <i>tropical japonica</i>  | JAPONICA | Belize                    | Central America |
| 35 | Hu Lo Tao                      | 0.97 | <i>temperate japonica</i> | JAPONICA | China                     | East Asia       |
| 36 | Sab Ini                        | 0.97 | <i>temperate japonica</i> | JAPONICA | Egypt                     | Africa          |
| 37 | Sinaguing                      | 0.97 | <i>tropical japonica</i>  | JAPONICA | Philippines               | Southeast Asia  |
| 38 | Vary Vato 462                  | 0.97 | <i>admixed-indica</i>     | INDICA   | Madagascar                | Africa          |
| 39 | PR 304                         | 0.96 | <i>tropical japonica</i>  | JAPONICA | Puerto Rico               | Caribbean       |
| 40 | Ai-Chiao-Hong                  | 0.96 | <i>indica</i>             | INDICA   | China                     | East Asia       |
| 41 | Saturn                         | 0.96 | <i>tropical japonica</i>  | JAPONICA | United States             | North America   |
| 42 | Melanotrix                     | 0.96 | <i>temperate japonica</i> | JAPONICA | Tajikistan                | Central Asia    |
| 43 | IAC 25                         | 0.96 | <i>tropical japonica</i>  | JAPONICA | Brazil                    | South America   |
| 44 | Ta Mao Tsao                    | 0.96 | <i>temperate japonica</i> | JAPONICA | China                     | East Asia       |
| 45 | Guatemala 1021                 | 0.96 | <i>tropical japonica</i>  | JAPONICA | Guatemala                 | Central America |
| 46 | NSF-TV 93                      | 0.95 | <i>aromatic</i>           | JAPONICA | Unknown                   | Unknown         |
| 47 | Doble Carolina Rinaldo Barsani | 0.95 | <i>admixed-japonica</i>   | JAPONICA | Uruguay                   | South America   |
| 48 | Mojito Colorado                | 0.95 | <i>tropical japonica</i>  | JAPONICA | Bolivia                   | South America   |
| 49 | Okshitmayin                    | 0.95 | <i>admixed-japonica</i>   | JAPONICA | Myanmar                   | Southeast Asia  |
| 50 | Upland                         | 0.95 | <i>tropical japonica</i>  | JAPONICA | Ponape Island, Micronesia | Oceania         |
| 51 | Carolina Gold Sel              | 0.95 | <i>tropical japonica</i>  | JAPONICA | United States             | North America   |
| 52 | Yabani Montakhab 7             | 0.95 | <i>temperate japonica</i> | JAPONICA | Egypt                     | Africa          |
| 53 | JC149                          | 0.95 | <i>indica</i>             | INDICA   | India                     | South Asia      |
| 54 | Keriting Tingii                | 0.95 | <i>admixed-japonica</i>   | JAPONICA | Indonesia                 | Southeast Asia  |
| 55 | Nova                           | 0.95 | <i>admixed-japonica</i>   | JAPONICA | United States             | North America   |
| 56 | Rikuto Norin 21                | 0.95 | <i>admixed-japonica</i>   | JAPONICA | Japan                     | East Asia       |
| 57 | OS 6 (WC 10296)                | 0.94 | <i>tropical japonica</i>  | JAPONICA | Zaire                     | Africa          |
| 58 | Baghlani Nangarhar             | 0.94 | <i>temperate japonica</i> | JAPONICA | Afghanistan               | South Asia      |
| 59 | Sanbyang-Daeme                 | 0.94 | <i>admixed-japonica</i>   | JAPONICA | Republic of Korea         | East Asia       |
| 60 | IRAT 13                        | 0.94 | <i>tropical japonica</i>  | JAPONICA | Cote D'Ivoire             | Africa          |
| 61 | KU115                          | 0.94 | <i>tropical japonica</i>  | JAPONICA | Thailand                  | Southeast Asia  |

|    |                   |      |                           |                |               |                 |
|----|-------------------|------|---------------------------|----------------|---------------|-----------------|
| 62 | Italica Carolina  | 0.94 | <i>temperate japonica</i> | JAPONICA       | Poland        | East Europe     |
| 63 | Sintane Diofor    | 0.93 | <i>indica</i>             | INDICA         | Burkina Faso  | Africa          |
| 64 | Taichung Native 1 | 0.93 | <i>indica</i>             | INDICA         | Taiwan        | East Asia       |
| 65 | Nipponbare        | 0.93 | <i>temperate japonica</i> | JAPONICA       | Japan         | East Asia       |
| 66 | Azucena           | 0.93 | <i>tropical japonica</i>  | JAPONICA       | Philippines   | Southeast Asia  |
| 67 | WC 4443           | 0.93 | <i>tropical japonica</i>  | JAPONICA       | Bolivia       | South America   |
| 68 | WC 4419           | 0.93 | <i>tropical japonica</i>  | JAPONICA       | Honduras      | Central America |
| 69 | Sundensis         | 0.93 | <i>indica</i>             | INDICA         | Kazakhstan    | Central Asia    |
| 70 | Shirogane         | 0.93 | <i>temperate japonica</i> | JAPONICA       | Japan         | East Asia       |
| 71 | CI 11026          | 0.92 | <i>admixed</i>            | <i>admixed</i> | United States | North America   |
| 72 | Taducan           | 0.92 | <i>indica</i>             | INDICA         | Philippines   | Southeast Asia  |
| 73 | Jefferson         | 0.92 | <i>tropical japonica</i>  | JAPONICA       | United States | North America   |
| 74 | WAB 56-104        | 0.92 | <i>tropical japonica</i>  | JAPONICA       | Cote D'Ivoire | Africa          |
| 75 | Khao Pahk Maw     | 0.92 | <i>aus</i>                | INDICA         | Thailand      | Southeast Asia  |
| 76 | Bahia             | 0.91 | <i>temperate japonica</i> | JAPONICA       | Spain         | West Europe     |
| 77 | Tropical Rice     | 0.91 | <i>temperate japonica</i> | JAPONICA       | Ecuador       | South America   |
| 78 | Blue Rose         | 0.91 | <i>admixed-japonica</i>   | JAPONICA       | United States | North America   |
| 79 | Boa Vista         | 0.91 | <i>tropical japonica</i>  | JAPONICA       | El Salvador   | Central America |
| 80 | Pai Hok Glutinous | 0.91 | <i>indica</i>             | INDICA         | Hong Kong     | East Asia       |
| 81 | JC 117            | 0.91 | <i>indica</i>             | INDICA         | India         | South Asia      |
| 82 | Sml Kapuri        | 0.91 | <i>temperate japonica</i> | JAPONICA       | Suriname      | South America   |
| 83 | Kaw Luyoeng       | 0.91 | <i>temperate japonica</i> | JAPONICA       | Thailand      | Southeast Asia  |

## Controls

|              |      |                        |
|--------------|------|------------------------|
| Quilla 66304 | 0.89 | High tolerance         |
| Lemont       | 0.45 | Intermediate tolerance |
| Zhe733       | 0.29 | Low tolerance          |

<sup>1)</sup> Additional information on the RDP1 accessions available on the GSOR website (<https://www.ars.usda.gov/southeast-area/stuttgart-ar/dale-bumpers-national-rice-research-center/docs/rice-diversity-panel-1/>)

<sup>2)</sup> The germination index is calculated as the ratio of the mean percentage of seeds with coleoptiles >5 mm under cold treatment to the mean percentage of seeds with coleoptiles >5 mm under warm treatment.

<sup>3)</sup> For ALL RDP1 accessions the mean germination index was 0.63 and the Standard Error was 0.02.

<sup>4)</sup> The subpopulation group and original providing country are listed as previously reported (4, 33).
