# Supplementary material
Source: publisher figshare collection journal article supplement (https://plos.figshare.com/articles/dataset/_/4744111)
Supplement: Supplementary file 1 [file 1 › S3 Fig.pdf]

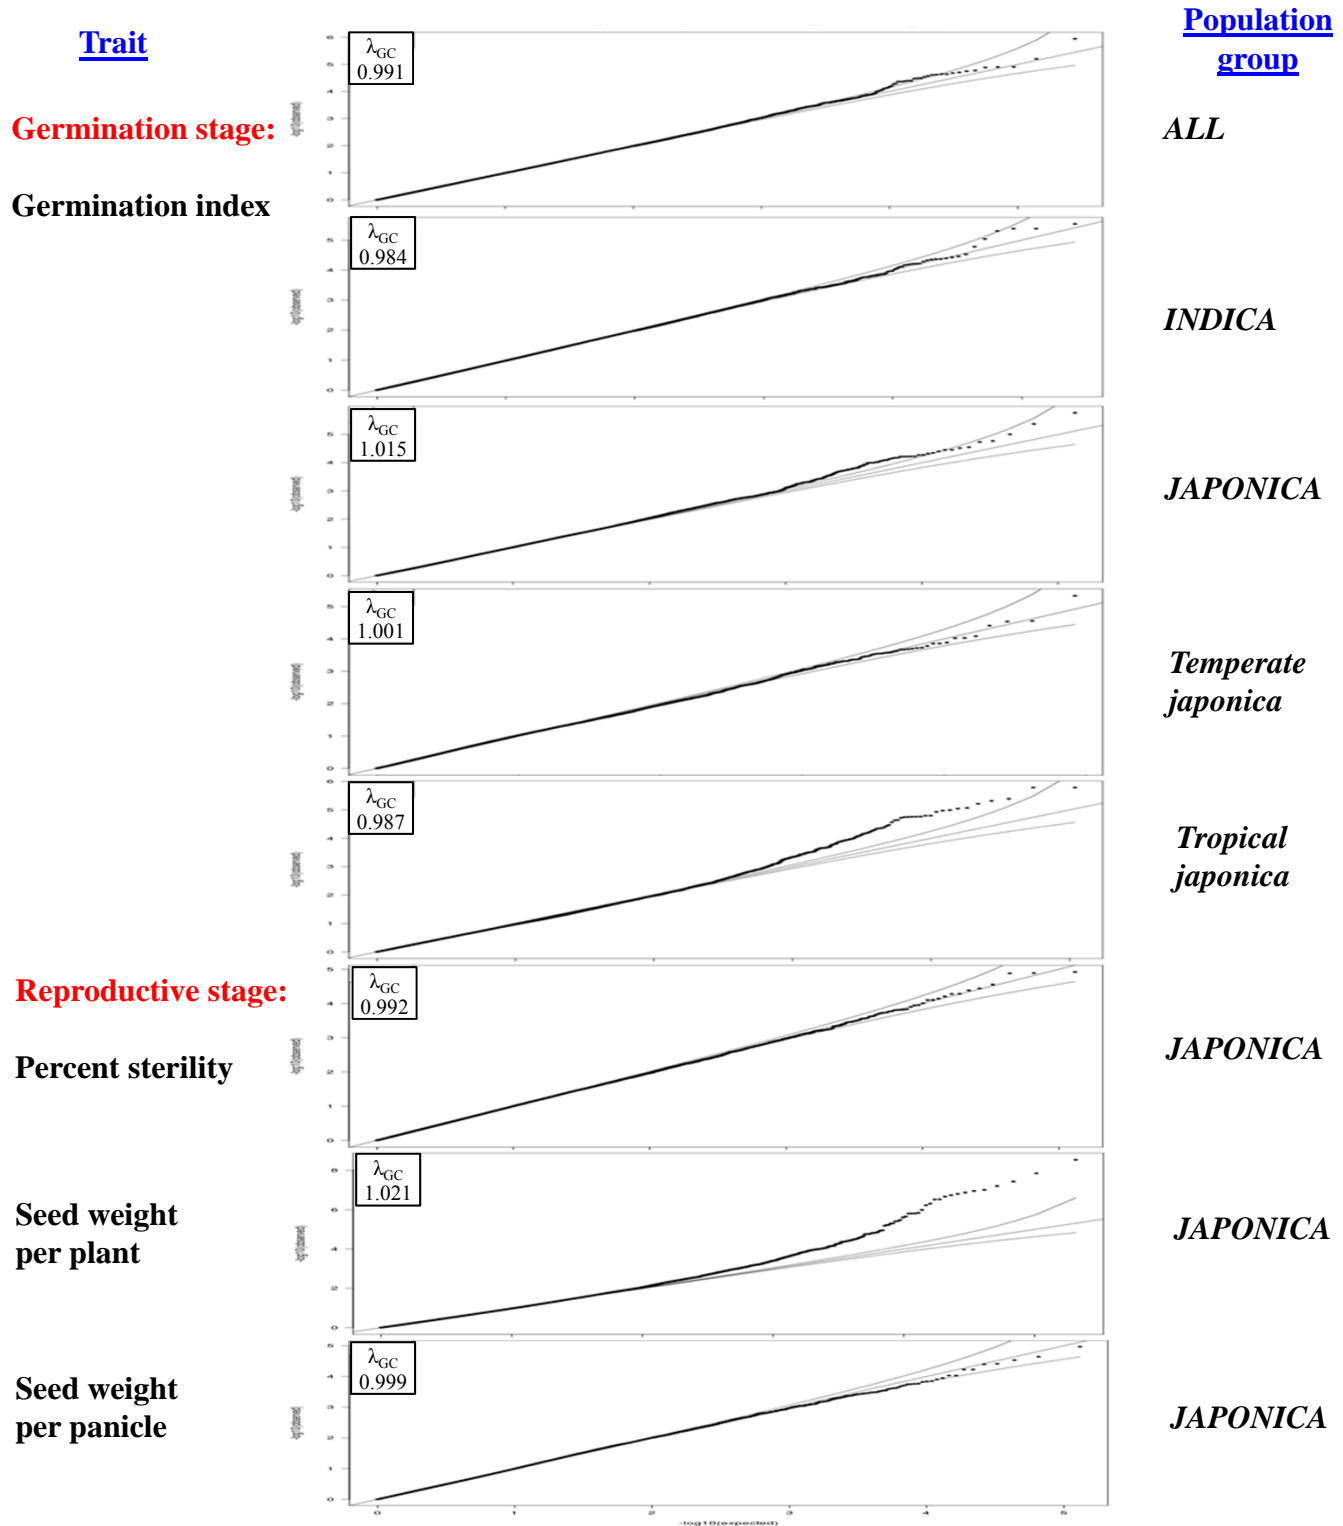

**S3 Fig. Quantile-Quantile plots for four cold tolerance traits measured at germination and at the reproductive stages.** The y-axis is the observed number and magnitude of observed  $p$ -value ( $-10 \log$ ) displays associations between SNPs and cold tolerance and the x-axis is the expected  $p$ -value ( $-10 \log$ ) under the null hypothesis (there is no association between SNPs and cold tolerance). The  $\lambda$  (lambda) is the genomic inflation factor.
