# Supplementary material
Source: publisher figshare collection journal article supplement (https://plos.figshare.com/articles/dataset/_/4744111)
Supplement: Supplementary file 1 [file 1 › S3 Table.pdf]

**S3 Table. List of the 206 RDP1 accessions identified evaluated for cold tolerance at the reproductive stage based on percent sterility, seed weight per plant or seed weight per panicle.** The accessions are grouped as those a) greater than or equal to the most cold tolerant control, Mustakilik, for at least one measure of cold tolerance, b) less than Mustakilik for all cold tolerant traits measured, c) accessions which did not produce panicles and d) controls. Days to heading and the germination index are included as a reference.

| Accession <sup>1)</sup>                                                                       | Germination index | Heading date | Percent sterility <sup>2)</sup> | Seed weight (g) per plant | Seed weight (g) per panicle |
|-----------------------------------------------------------------------------------------------|-------------------|--------------|---------------------------------|---------------------------|-----------------------------|
| <b>Accessions which were more cold tolerant for at least one trait measured <sup>3)</sup></b> |                   |              |                                 |                           |                             |
| 27                                                                                            | 0.76              | 81           | <u>2.5</u>                      | 6.05                      | 1.13                        |
| Agostano                                                                                      | 0.71              | 75           | <u>3.0</u>                      | <u>11.95</u>              | 1.37                        |
| <u>Agusita</u>                                                                                | 0.54              | 60           | <u>2.5</u>                      | <u>15.10</u>              | <u>1.41</u>                 |
| Aichi Asahi                                                                                   | 0.87              | 136          | <u>2.5</u>                      | 2.95                      | 0.39                        |
| ASD 1                                                                                         | 0.70              | 86           | <u>3.0</u>                      | <u>15.00</u>              | 1.09                        |
| Azerbaidjanica                                                                                | 0.50              | 56           | <u>3.0</u>                      | 7.50                      | 0.83                        |
| Azucena_312001                                                                                | 0.87              | 136          | <u>2.5</u>                      | 4.15                      | 0.64                        |
| Baber                                                                                         | <u>1.02</u>       | 79           | <u>2.0</u>                      | 11.05                     | 1.11                        |
| Bahia                                                                                         | <u>0.91</u>       | 130          | <u>2.0</u>                      | 3.20                      | 0.64                        |
| Baldo                                                                                         | 0.61              | 75           | 4.5                             | 6.80                      | <u>1.54</u>                 |
| Bellardone                                                                                    | 0.72              | 73           | 3.5                             | 10.25                     | <u>1.59</u>                 |
| Bergreis                                                                                      | 0.71              | 136          | <u>2.0</u>                      | 6.00                      | 0.92                        |
| <u>Biser 1</u>                                                                                | 0.73              | 77           | <u>1.5</u>                      | <u>14.80</u>              | <u>1.96</u>                 |
| Blue Rose Supreme                                                                             | 0.82              | 134          | <u>2.5</u>                      | 5.70                      | 1.07                        |
| Boa Vista                                                                                     | <u>0.91</u>       | 140          | <u>2.5</u>                      | 1.40                      | 0.40                        |
| Bul Zo                                                                                        | 0.02              | 135          | <u>3.0</u>                      | 4.80                      | 0.83                        |
| Bulgare                                                                                       | 0.87              | 48           | <u>2.0</u>                      | 6.00                      | 0.70                        |
| Chodongji                                                                                     | 0.74              | 126          | <u>2.5</u>                      | 7.40                      | 0.99                        |
| CS-M3                                                                                         | 0.20              | 133          | <u>2.5</u>                      | 6.25                      | 0.67                        |
| Early Wataribune                                                                              | 0.87              | 113          | <u>3.0</u>                      | 5.95                      | 0.91                        |
| Erythroceros Hokkaido                                                                         | 0.75              | 48           | <u>2.5</u>                      | 6.10                      | 0.92                        |
| Gambiaka Sebela                                                                               | 0.48              | 134          | <u>2.5</u>                      | 1.85                      | 0.57                        |
| Hiderisirazu                                                                                  | 0.86              | 82           | <u>3.0</u>                      | 7.50                      | 1.36                        |
| IAC 25                                                                                        | <u>0.96</u>       | 73           | <u>2.0</u>                      | 6.80                      | 1.13                        |
| Iguape Cateto                                                                                 | 0.61              | 134          | <u>2.0</u>                      | 5.25                      | 1.32                        |
| IITA 135                                                                                      | 0.71              | 128          | <u>3.0</u>                      | 2.25                      | 1.13                        |
| Italica Carolina                                                                              | <u>0.94</u>       | 53           | <u>2.0</u>                      | 9.70                      | 1.01                        |
| Kamenoo                                                                                       | 0.83              | 78           | <u>3.0</u>                      | 9.70                      | 0.94                        |
| <u>Karabaschak</u>                                                                            | <u>1.05</u>       | 77           | <u>3.0</u>                      | <u>17.75</u>              | <u>1.57</u>                 |
| Kihogo                                                                                        | 0.67              | 130          | <u>2.0</u>                      | 4.70                      | 1.03                        |
| Kiuki No. 46                                                                                  | 0.88              | 128          | <u>2.5</u>                      | 1.95                      | 0.31                        |

|                          |             |     |            |              |             |
|--------------------------|-------------|-----|------------|--------------|-------------|
| Kon Suito                | 0.77        | 43  | <u>2.5</u> | 6.95         | 0.60        |
| Koshihikari              | 0.67        | 141 | <u>3.0</u> | 0.55         | 0.22        |
| Leuang Hawn              | 0.43        | 45  | <u>2.5</u> | 3.45         | 0.67        |
| Ligerito                 | 0.78        | 76  | <u>3.0</u> | 5.75         | 1.04        |
| Li-Jiang-Xin-Tuan-Hei-Gu | <u>1.10</u> | 103 | <u>3.0</u> | 10.85        | 1.26        |
| Lusitano                 | 0.69        | 56  | 4.0        | 6.30         | <u>1.41</u> |
| M. Blatec                | 0.61        | 82  | <u>3.0</u> | <u>20.45</u> | <u>2.56</u> |
| M-202_301370             | 0.75        | 124 | <u>2.5</u> | 1.95         | 0.49        |
| M-202_312011             | <u>1.03</u> | 119 | <u>3.0</u> | 5.90         | 0.87        |
| Mansaku                  | 0.45        | 79  | <u>2.5</u> | 6.75         | 1.13        |
| Manzano                  | <u>1.00</u> | 110 | <u>3.0</u> | 3.00         | 0.41        |
| Melanotrix               | <u>0.96</u> | 71  | <u>3.0</u> | 11.45        | 1.15        |
| Nipponbare_301164        | <u>0.93</u> | 134 | <u>3.0</u> | 1.40         | 0.16        |
| Norin 20                 | 0.53        | 46  | <u>3.0</u> | 5.45         | 1.01        |
| Nortai                   | 0.61        | 135 | <u>2.5</u> | 2.35         | 0.57        |
| Nucleoryza               | 0.90        | 55  | <u>2.5</u> | 11.25        | 0.77        |
| Oro                      | 0.36        | 76  | <u>2.5</u> | <u>14.50</u> | <u>1.71</u> |
| OS 6 (WC 10296)          | <u>0.94</u> | 121 | <u>2.5</u> | 5.30         | 0.76        |
| Padi Pagalong            | <u>1.00</u> | 103 | <u>2.5</u> | 3.80         | 0.80        |
| Panda                    | 0.86        | 110 | <u>1.5</u> | <u>13.95</u> | <u>1.46</u> |
| PI 298967-1              | 0.41        | 141 | <u>2.0</u> | 2.00         | 0.46        |
| Priano Guaira            | <u>1.00</u> | 72  | <u>2.0</u> | 6.00         | 0.90        |
| Rikuto Kemochi           | 0.48        | 99  | 3.5        | 8.60         | <u>1.60</u> |
| <u>Rikuto Norin 21</u>   | <u>0.95</u> | 80  | <u>1.5</u> | <u>12.25</u> | <u>1.70</u> |
| Romanica                 | 0.68        | 49  | <u>2.0</u> | 11.60        | 1.16        |
| Sab Ini                  | <u>0.97</u> | 72  | <u>3.0</u> | <u>12.40</u> | 1.15        |
| Sanbyang-Daeme           | <u>0.94</u> | 105 | <u>2.5</u> | 4.75         | 0.86        |
| Shinriki                 | 0.36        | 135 | <u>2.0</u> | 3.15         | 0.48        |
| Sitpwa                   | 0.54        | 105 | <u>3.0</u> | 5.50         | 0.92        |
| Sml Kapuri               | <u>0.91</u> | 110 | <u>3.0</u> | 5.50         | 0.93        |
| Sri Malaysia Dua         | 0.23        | 76  | <u>3.0</u> | 10.10        | 0.84        |
| Stegaru 65               | 0.46        | 65  | <u>3.0</u> | <u>14.25</u> | 1.16        |
| Ta Hung Ku               | 0.64        | 88  | 4.0        | <u>12.35</u> | 0.94        |
| Tokyo Shino Mochi        | 0.78        | 99  | <u>3.0</u> | 6.70         | 1.03        |
| Tropical Rice            | <u>0.91</u> | 56  | 4.0        | <u>11.85</u> | <u>1.41</u> |
| Vavilovi                 | 0.83        | 53  | <u>3.0</u> | <u>13.75</u> | 1.05        |
| Vialone                  | 0.80        | 90  | 5.0        | 8.40         | <u>1.40</u> |
| Victoria F.A.            | 0.73        | 78  | 4.0        | <u>11.95</u> | <u>1.45</u> |
| WAB 56-104               | <u>0.92</u> | 74  | <u>3.0</u> | 7.80         | <u>1.38</u> |
| WIR 3039                 | 0.84        | 71  | <u>3.0</u> | 8.55         | 0.73        |
| WIR 3764                 | 0.46        | 50  | <u>3.0</u> | 9.85         | 0.53        |

|       |      |     |     |       |                    |
|-------|------|-----|-----|-------|--------------------|
| YRL-1 | 0.84 | 110 | 3.5 | 10.50 | <u><b>1.39</b></u> |
|-------|------|-----|-----|-------|--------------------|

**Accessions which did not show cold tolerance at the reproductive stage**

|                         |                    |      |     |       |      |
|-------------------------|--------------------|------|-----|-------|------|
| 318                     | <u><b>1.02</b></u> | 130  | 4.0 | 1.65  | 0.57 |
| 325                     | <u><b>0.98</b></u> | 128  | 3.5 | 4.30  | 0.96 |
| 519                     | 0.36               | 90   | 7.0 | 0.10  | 0.01 |
| 56-122-23               | 0.38               | 110  | 4.5 | 3.65  | 0.33 |
| 68-2                    | 0.68               | 95   | 4.5 | 4.55  | 0.58 |
| Amposta                 | 0.21               | 76   | 5.0 | 2.60  | 0.27 |
| Azucena_301165          | <u><b>0.93</b></u> | 131  | 4.5 | 1.10  | 0.24 |
| B6616A4-22-Bk-5-4       | 0.77               | 85   | 6.0 | 0.85  | 0.14 |
| Baghlani Nangarhar      | <u><b>0.94</b></u> | 123  | 4.0 | 1.40  | 0.14 |
| Bengal                  | <u><b>1.00</b></u> | 127  | 4.5 | 5.25  | 0.76 |
| Benllok                 | 0.63               | 108  | 3.5 | 8.65  | 0.93 |
| Beonjo                  | 0.73               | 125  | 4.0 | 4.95  | 0.41 |
| Blue Rose               | <u><b>0.91</b></u> | 135  | 4.0 | 5.55  | 0.94 |
| Bombilla                | 0.53               | 116  | 6.5 | 0.45  | 0.06 |
| Bombon                  | 0.59               | 122  | 4.0 | 6.95  | 1.20 |
| Breviaristata           | 0.86               | 86.5 | 4.5 | 6.65  | 1.11 |
| British Honduras Creole | <u><b>0.97</b></u> | 81   | 5.0 | 4.20  | 0.50 |
| C57-5043                | 0.70               | 86   | 4.5 | 3.60  | 0.51 |
| Carolina Gold 12033     | 0.85               | 128  | 5.5 | 1.80  | 0.50 |
| Carolina Gold 12034     | <u><b>0.98</b></u> | 130  | 5.0 | 3.40  | 0.55 |
| Carolina Gold Sel       | <u><b>0.95</b></u> | 129  | 5.0 | 2.00  | 0.55 |
| Caucasica               | 0.69               | 101  | 3.5 | 6.35  | 1.33 |
| Cenit                   | 0.79               | 128  | 3.5 | 4.80  | 0.88 |
| Chibica                 | 0.90               | 106  | 4.0 | 10.65 | 0.85 |
| Cocodrie                | 0.30               | 88.5 | 5.0 | 0.95  | 0.16 |
| Creole                  | 0.84               | 129  | 5.0 | 2.15  | 0.39 |
| Cuba 65                 | 0.85               | 98   | 5.0 | 2.50  | 0.32 |
| Cybonnet                | 0.01               | 87   | 7.0 | 0.10  | 0.02 |
| Cypress                 | 0.43               | 106  | 6.5 | 0.55  | 0.06 |
| Dam                     | 0.33               | 133  | 3.5 | 3.95  | 0.56 |
| Darmali                 | 0.68               | 129  | 4.0 | 5.25  | 0.83 |
| Della                   | 0.49               | 130  | 4.5 | 1.90  | 0.30 |
| Deokjeokjodo            | 0.69               | 116  | 4.0 | 2.60  | 0.43 |
| Desvauxii               | 0.88               | 81   | 4.5 | 4.90  | 0.58 |
| Doble Carolina Rinaldo  |                    |      |     |       |      |
| Barsani                 | <u><b>0.95</b></u> | 93   | 4.5 | 7.15  | 0.97 |
| Dosel                   | 0.54               | 120  | 4.0 | 3.75  | 0.70 |
| Dourado Agulha          | 0.21               | 135  | 4.5 | 3.20  | 0.57 |

|                   |                    |     |     |      |      |
|-------------------|--------------------|-----|-----|------|------|
| Early             | <u><b>1.03</b></u> | 62  | 4.5 | 7.30 | 0.77 |
| Edith             | <u><b>1.05</b></u> | 121 | 5.5 | 3.55 | 0.47 |
| Edomen Scented    | 0.58               | 137 | 3.5 | 2.00 | 0.24 |
| Estrela           | 0.79               | 89  | 5.0 | 2.45 | 0.30 |
| Fossa Av          | 0.59               | 129 | 5.5 | 1.45 | 0.23 |
| Gogo Lempuk       | 0.87               | 129 | 5.5 | 0.40 | 0.08 |
| Gotak Gatik       | 0.73               | 89  | 6.0 | 0.10 | 0.03 |
| Guatemala 1021    | <u><b>0.96</b></u> | 119 | 5.0 | 3.30 | 0.47 |
| Guineandao        | <u><b>0.99</b></u> | 128 | 3.5 | 4.35 | 0.61 |
| Gyehwa 3          | 0.42               | 121 | 5.5 | 0.45 | 0.14 |
| H256-76-1-1-1     | 0.87               | 105 | 5.0 | 1.25 | 0.31 |
| Habiganj Boro 6   | 0.34               | 90  | 5.0 | 5.55 | 0.59 |
| Haginomae Mochi   | <u><b>1.71</b></u> | 120 | 3.5 | 3.15 | 0.53 |
| Hatsunishiki      | 0.82               | 101 | 5.5 | 2.40 | 0.23 |
| Heukgyeong        | 0.77               | 104 | 3.5 | 9.05 | 0.87 |
| Honduras          | 0.85               | 134 | 4.0 | 3.95 | 0.73 |
| IRAT 44           | 0.80               | 91  | 4.0 | 1.50 | 0.38 |
| Jambu             | <u><b>1.02</b></u> | 126 | 7.0 | 0.15 | 0.10 |
| Jefferson         | <u><b>0.92</b></u> | 86  | 6.5 | 1.80 | 0.53 |
| Jouiku 393G       | 0.27               | 83  | 4.5 | 5.60 | 0.76 |
| Kaniranga         | 0.89               | 78  | 4.5 | 3.25 | 0.66 |
| Katy              | 0.31               | 116 | 6.5 | 0.25 | 0.11 |
| Kaw Luyoeng       | <u><b>0.91</b></u> | 135 | 4.5 | 2.70 | 0.59 |
| Kaybonnet         | 0.89               | 89  | 7.0 | 0.10 | 0.02 |
| Keriting Tingii   | <u><b>0.95</b></u> | 138 | 4.0 | 2.05 | 0.47 |
| Kinastano         | <u><b>1.02</b></u> | 133 | 5.0 | 2.10 | 0.70 |
| L-202             | 0.73               | 82  | 4.5 | 3.80 | 0.68 |
| LAC 23            | 0.02               | 134 | 4.0 | 2.65 | 0.75 |
| Lacrosse          | 0.83               | 135 | 4.5 | 4.75 | 0.76 |
| Lady Wright Seln  | 0.78               | 105 | 4.5 | 5.40 | 0.77 |
| Lomello           | 0.82               | 87  | 5.0 | 3.20 | 0.62 |
| Maratelli         | 0.57               | 76  | 4.5 | 6.70 | 1.34 |
| Mojito Colorado   | <u><b>0.95</b></u> | 132 | 4.0 | 3.65 | 0.52 |
| Nipponbare_312005 | 0.84               | 121 | 6.5 | 0.50 | 0.06 |
| Niquen            | <u><b>1.01</b></u> | 47  | 3.5 | 5.25 | 0.76 |
| Nova              | <u><b>0.95</b></u> | 132 | 4.5 | 3.85 | 0.59 |
| NSF-TV 107        | <u><b>1.00</b></u> | 75  | 4.0 | 5.15 | 0.86 |
| NSF-TV 116        | 0.51               | 126 | 4.5 | 3.40 | 0.58 |
| NSF-TV 199        | 0.72               | 79  | 7.0 | 0.10 | 0.02 |
| NSF-TV 89         | 0.71               | 121 | 5.0 | 0.80 | 0.20 |
| NSF-TV 95         | 0.84               | 129 | 6.5 | 0.95 | 0.21 |

|                   |             |     |     |      |      |
|-------------------|-------------|-----|-----|------|------|
| Okshitmayin       | <u>0.95</u> | 118 | 5.0 | 1.55 | 0.15 |
| OS6               | 0.61        | 121 | 5.0 | 1.35 | 0.26 |
| Osogovka          | 0.31        | 101 | 4.5 | 5.25 | 1.02 |
| Ostiglia          | 0.81        | 124 | 4.0 | 2.90 | 0.41 |
| Palmyra           | 0.84        | 125 | 3.5 | 6.15 | 0.95 |
| Pate Blanc Mn 1   | <u>0.98</u> | 139 | 4.0 | 0.95 | 0.27 |
| Patna             | 0.33        | 107 | 5.0 | 2.60 | 0.54 |
| Pato De Gallinazo | 0.46        | 84  | 4.5 | 5.25 | 0.56 |
| Pecos             | 0.67        | 122 | 5.0 | 2.90 | 0.39 |
| PR 304            | <u>0.96</u> | 119 | 4.5 | 3.65 | 0.56 |
| Pratao            | 0.70        | 133 | 4.0 | 2.25 | 0.78 |
| R 101             | 0.80        | 141 | 5.0 | 1.60 | 0.34 |
| Razza 77          | 0.57        | 105 | 3.5 | 6.95 | 1.08 |
| Rinaldo Bersani   | 0.89        | 105 | 4.5 | 6.60 | 0.69 |
| Romeo             | <u>1.08</u> | 94  | 5.0 | 5.70 | 1.27 |
| Rosemont          | 0.67        | 90  | 5.0 | 1.30 | 0.31 |
| Saber             | <u>1.00</u> | 88  | 3.5 | 2.05 | 0.44 |
| Saku              | 0.38        | 107 | 4.5 | 2.90 | 0.56 |
| Saturn            | <u>0.96</u> | 126 | 5.0 | 1.85 | 0.40 |
| Shirogane         | <u>0.93</u> | 78  | 6.5 | 2.40 | 0.13 |
| Shoemed           | 0.37        | 132 | 3.5 | 2.60 | 0.52 |
| Sung Liao 2       | 0.37        | 63  | 6.0 | 1.65 | 0.21 |
| Ta Mao Tsao       | <u>0.96</u> | 105 | 4.5 | 4.65 | 0.49 |
| Tia Bura          | 0.85        | 122 | 5.0 | 2.55 | 0.36 |
| Toploea 70/76     | 0.49        | 57  | 5.0 | 0.60 | 0.08 |
| Trembese          | 0.25        | 134 | 7.0 | 0.30 | 0.09 |
| Upland            | <u>0.95</u> | 128 | 4.0 | 3.10 | 0.74 |
| Uzbekskij 2       | 0.23        | 78  | 4.5 | 5.60 | 1.00 |
| Varyla            | 0.79        | 86  | 3.5 | 4.00 | 0.68 |
| WAB 501-11-5-1    | 0.54        | 96  | 5.5 | 2.35 | 0.30 |
| WAB 502-13-4-1    | 0.79        | 88  | 4.0 | 6.10 | 0.97 |
| Wanica            | 0.90        | 126 | 5.5 | 3.40 | 0.50 |
| WC 3397           | 0.90        | 71  | 7.0 | 0.10 | 0.02 |
| WC 521            | 0.42        | 114 | 4.5 | 1.95 | 0.44 |
| WC 6              | 0.51        | 112 | 4.5 | 4.40 | 0.55 |

**Accessions which did not head during treatment period** <sup>4)</sup>

|             |      |   |   |   |   |
|-------------|------|---|---|---|---|
| ARC 10086   | 0.85 | — | — | — | — |
| Arias       | 0.85 | — | — | — | — |
| Asse Y Pung | 0.82 | — | — | — | — |
| C1-6-5-3    | 0.80 | — | — | — | — |

|                        |             |     |     |       |      |
|------------------------|-------------|-----|-----|-------|------|
| Caawa/Fortuna 6-103-15 | 0.01        | —   | —   | —     | —    |
| Canella De Ferro       | 0.90        | —   | —   | —     | —    |
| Chinese                | <u>0.99</u> | —   | —   | —     | —    |
| CI 11011               | 0.56        | —   | —   | —     | —    |
| Delrex                 | 0.90        | —   | —   | —     | —    |
| Fortuna                | 0.54        | —   | —   | —     | —    |
| Geumobyeo              | 0.18        | —   | —   | —     | —    |
| Hu Lo Tao              | <u>0.97</u> | —   | —   | —     | —    |
| IRAT 13                | <u>0.94</u> | —   | —   | —     | —    |
| IRAT 177               | 0.84        | —   | —   | —     | —    |
| Kibi                   | <u>1.00</u> | —   | —   | —     | —    |
| KU115                  | <u>0.94</u> | —   | —   | —     | —    |
| LaGrue                 | <u>1.03</u> | —   | —   | —     | —    |
| Leah                   | 0.76        | —   | —   | —     | —    |
| Lemont                 | 0.69        | —   | —   | —     | —    |
| Llanero 501            | <u>1.17</u> | —   | —   | —     | —    |
| Luk Takhar             | <u>0.99</u> | —   | —   | —     | —    |
| MCR010277              | 0.00        | —   | —   | —     | —    |
| Moroberekan_301100     | 0.82        | —   | —   | —     | —    |
| Moroberekan_312004     | 0.84        | —   | —   | —     | —    |
| NSF-TV 27              | 0.46        | —   | —   | —     | —    |
| Padi Kasalle           | 0.72        | —   | —   | —     | —    |
| RT 1031-69             | 0.85        | —   | —   | —     | —    |
| S4542A3-49B-2B12       | 0.73        | —   | —   | —     | —    |
| Shangyu 394            | 0.53        | —   | —   | —     | —    |
| Sinaguing              | <u>0.97</u> | —   | —   | —     | —    |
| Sinampaga Selection    | 0.90        | —   | —   | —     | —    |
| Suweon§§               | 0.75        | —   | —   | —     | —    |
| Tainan Iku 487         | 0.60        | —   | —   | —     | —    |
| Tainan-Iku No. 512     | 0.46        | —   | —   | —     | —    |
| Tainung 67             | 0.33        | —   | —   | —     | —    |
| Taipei 309             | <u>0.98</u> | —   | —   | —     | —    |
| Tondok                 | 0.73        | —   | —   | —     | —    |
| Triomphe Du Maroc      | <u>1.06</u> | —   | —   | —     | —    |
| WC 4419                | <u>0.93</u> | —   | —   | —     | —    |
| WC 4443                | <u>0.93</u> | —   | —   | —     | —    |
| Yabani Montakhab 7     | <u>0.95</u> | —   | —   | —     | —    |
| <b><u>Controls</u></b> | —           |     |     |       |      |
| Mustakilik             | —           | 112 | 3.5 | 11.33 | 1.34 |
| M-202                  | —           | 125 | 3.5 | 7.50  | 0.69 |

|              |   |     |     |      |      |
|--------------|---|-----|-----|------|------|
| M-206        | — | 89  | 3.5 | 6.03 | 0.67 |
| M-205        | — | 113 | 4.0 | 3.98 | 0.43 |
| L-206        | — | 86  | 4.3 | 2.50 | 0.31 |
| Calmochi 101 | — | 90  | 4.8 | 2.20 | 0.21 |
| Calmati 201  | — | 94  | 6.3 | 2.60 | 0.22 |
| Jinbu        | — | 73  | 7.0 | 0.50 | 0.06 |

<sup>1)</sup> Accessions underscored were cold tolerant for the three reproductive traits and bold, italics indicates cold tolerant at germination too.

<sup>2)</sup> Percent sterility was rated with the following categories: category 1 (0 to 5% sterility), 2 (6 to 12%), 3 (13 to 18%), 4 (19 to 40%), 5 (41 to 60%), 6 (61 to 90%) and 7 (91 to 100%).

<sup>3)</sup> All traits in bold, italics and underscored were better than the most tolerant check the SE (Table 1). SE values: percent sterility (0.1), seed weight per plant (0.28) and seed weight per panicle (0.03)

<sup>4)</sup> Dash indicates no data was collected for the given trait.
