# Supplementary material
Source: publisher figshare collection journal article supplement (https://plos.figshare.com/articles/dataset/_/4744111)
Supplement: Supplementary file 1 [file 1 › S4 Table.pdf]

**S4 Table. Summary of QTLs identified by GWA mapping in this study which co-localized with previously reported QTLs at the germination and reproductive stages.** The previously reported QTLs were identified in both bi-parental populations and by GWA mapping in or near the QTL regions identified in this study.

| QTL                | Population group /Trait <sup>1)</sup> | QTL                                                                                                   | Chr. | QTL region (bp)       | Marker position (bp) | Description <sup>2)</sup> | Reference <sup>3),4),5)</sup> |
|--------------------|---------------------------------------|-------------------------------------------------------------------------------------------------------|------|-----------------------|----------------------|---------------------------|-------------------------------|
| <b>Germination</b> |                                       |                                                                                                       |      |                       |                      |                           |                               |
| <i>qCTGERM1-3</i>  | <i>ALL</i>                            | <i>qCTB1</i> <sup>6)</sup>                                                                            | 1    | 5,558,576-7,445,919   | 8,190,528            | cold tolerance            | 6                             |
|                    | <i>ALL</i>                            | <i>COLD3</i>                                                                                          | 1    | 7,280,970-9,390,430   | 8,190,528            | cold tolerance            | 47                            |
| <i>qCTGERM1-6</i>  | <i>JAPONICA</i>                       | <i>L8</i> <sup>7)</sup>                                                                               | 1    | 22,610,678            | 22,610,678           | ELC2                      | 13                            |
| <i>qCTGERM1-8</i>  | <i>ALL</i>                            | <i>qCTS1-5</i>                                                                                        | 1    | 41,860,220            | 41,860,220           | cold tolerance            | 32                            |
|                    | <i>temperate japonica</i>             | <i>qCTS1-5</i>                                                                                        | 1    | 41,860,220            | 41,860,220           | cold tolerance            | 32                            |
| <i>qCTGERM2-2</i>  | <i>ALL</i>                            | <i>L21</i> <sup>7)</sup>                                                                              | 2    | 6,695,685             | 6,695,685            | ELSR2                     | 13                            |
|                    | <i>INDICA</i>                         | <i>L21</i> <sup>7)</sup>                                                                              | 2    | 6,695,685             | 6,695,685            | ELSR2                     | 13                            |
| <i>qCTGERM4-2</i>  | <i>ALL</i>                            | <i>qCTS4-1</i>                                                                                        | 4    | 688,353-6,574,518     | 1,116,687            | cold tolerance            | 1                             |
|                    | <i>JAPONICA</i>                       | <i>qCTS4-1</i>                                                                                        | 4    | 688,353-6,574,518     | 866,416              | cold tolerance            | 1, 55, 82                     |
|                    | <i>temperate japonica</i>             | <i>qCTS4-1</i>                                                                                        | 4    | 688,353-6,574,518     | 894,359              | cold tolerance            | 1, 55, 82                     |
| <i>qCTGERM4-3</i>  | <i>INDICA</i>                         | <i>L46</i> <sup>7)</sup>                                                                              | 4    | 27,105,852            | 27,105,852           | RLC                       | 1, 13                         |
|                    | <i>INDICA</i>                         | <i>qCTS4-3</i>                                                                                        | 4    | 26,857,374-29,061,127 | 27,214,088           | cold tolerance            | 1                             |
| <i>qCTGERM4-4</i>  | <i>ALL</i>                            | <i>qCTS4-2</i>                                                                                        | 4    | 30,772,388-32,650,528 | 31,159,129           | cold tolerance            | 1, 55                         |
|                    | <i>JAPONICA</i>                       | <i>qCTS4-2</i>                                                                                        | 4    | 30,772,388-32,650,528 | 31,436,463           | cold tolerance            | 82                            |
|                    | <i>temperate japonica</i>             | <i>qCTS4-2</i>                                                                                        | 4    | 30,772,388-32,650,528 | 31,524,171           | cold tolerance            | 82                            |
| <i>qCTGERM4-5</i>  | <i>JAPONICA</i>                       | <i>qCTS4-2, L48</i> <sup>7)</sup> ,<br><i>qLTG-4</i>                                                  | 4    | 30,772,388-32,650,528 | 31,428,589           | cold tolerance            | 31, 13, 82                    |
|                    | <i>temperate japonica</i>             | <i>qCTS4-2</i>                                                                                        | 4    | 30,772,388-32,650,528 | 31,428,589           | cold tolerance            | 31, 13, 82                    |
| <i>qCTGERM5-1</i>  | <i>tropical japonica</i>              | <i>qCTS5</i>                                                                                          | 5    | 19,189,417-22,051,412 | 21,484,489           | cold tolerance            | 48                            |
|                    | <i>tropical japonica</i>              | <i>qCTS5, L51</i> <sup>6),7)</sup> ,<br><i>qLTG-5-2</i> <sup>6)</sup> ,<br><i>qCTS5</i> <sup>6)</sup> | 5    | 19,189,417-22,051,412 | 21,736,056           | cold tolerance            | 48, 13, 45, 46                |
| <i>qCTGERM6-1</i>  | <i>JAPONICA</i>                       | <i>qCTS6-1</i> <sup>6)</sup>                                                                          | 6    | 5,425,408-5,425,631   | 6,014,941            | cold tolerance            | 1, 55, 82, 47                 |
|                    | <i>JAPONICA</i>                       | <i>COLD4</i>                                                                                          | 6    | 4,303,092-9,309,108   | 6,014,941            | cold tolerance            | 47                            |
| <i>qCTGERM6-2</i>  | <i>INDICA</i>                         | <i>qCTS6-2</i>                                                                                        | 6    | 6,229,689             | 6,229,689            | cold tolerance            | 32                            |
| <i>qCTGERM7-1</i>  | <i>tropical japonica</i>              | <i>L72</i> <sup>6),7)</sup> , <i>qCTS7</i> <sup>6)</sup> ,<br><i>qPSST-7</i> <sup>6)</sup> ,          | 7    | 10,627,289            | 10,627,289           | cold tolerance            | 49, 46                        |
| <i>qCTGERM7-4</i>  | <i>ALL</i>                            | <i>qCTS7(2)</i>                                                                                       | 7    | 17,470,108-22,550,963 | 20,134,258           | cold tolerance            | 48                            |

|                     |                           |                                               |    |                       |            |                               |               |
|---------------------|---------------------------|-----------------------------------------------|----|-----------------------|------------|-------------------------------|---------------|
|                     | <i>ALL</i>                | <i>qCTS7-2</i>                                | 7  | 17,876,290            | 17876290   | cold tolerance                | 32            |
|                     | <i>JAPONICA</i>           | <i>qCTS7(2)</i>                               | 7  | 17,470,108-22,550,963 | 20,000,802 | cold tolerance                | 48            |
| <i>qCTGERM7-5</i>   | <i>tropical japonica</i>  | <i>L79<sup>7)</sup></i>                       | 7  | 27,844,441            | 27,844,441 | BMR                           | 13            |
| <i>qCTGERM8-1</i>   | <i>ALL</i>                | <i>qCTF8</i>                                  | 8  | 8,497,626- 10,798,150 | 10,476,180 | cold tolerance                | 83            |
|                     | <i>ALL</i>                | <i>qCTS8-3</i>                                | 8  | 10,507,858            | 10,507,858 | cold tolerance                | 32            |
| <i>qCTGERM10-2</i>  | <i>tropical japonica</i>  | <i>qCTS10, L102<sup>7)</sup>,<br/>qLTG-10</i> | 10 | 9,692,509-16,358,895  | 10,257,370 | cold tolerance                | 82, 14, 45 13 |
| <i>qCTGERM10-3</i>  | <i>INDICA</i>             | <i>qCST10, L107<sup>7)</sup></i>              | 10 | 22,395,026            | 22,395,026 | cold tolerance                | 46, 13        |
| <i>qCTGERM11-4</i>  | <i>INDICA</i>             | <i>qCTS11-5</i>                               | 11 | 17,985,707            | 17,985,707 | cold tolerance                | 32            |
| <i>qCTGERM11-5</i>  | <i>temperate japonica</i> | <i>qCTS11(2)-2</i>                            | 11 | 19,639,219-22,014,679 | 19,718,317 | cold tolerance                | 48            |
| <i>qCTGERM12-2</i>  | <i>ALL</i>                | <i>qCTF12</i>                                 | 12 | 23,494,445-27,466,213 | 26,426,057 | cold tolerance                | 83            |
|                     | <i>INDICA</i>             | <i>qCTF12</i>                                 | 12 | 23,494,445-27,466,213 | 26,366,145 | cold tolerance                | 83            |
| <i>qCTGERM12-3</i>  | <i>INDICA</i>             | <i>qCTF12</i>                                 | 12 | 23,494,445-27,466,213 | 27,219,850 | cold tolerance                | 83            |
| <b>Reproductive</b> |                           |                                               |    |                       |            |                               |               |
| <i>qSWTPNCT1-1</i>  | SWPan                     | <i>Pdw1-1<sup>6)</sup></i>                    | 1  | 3,509,004-3,509,959   | 3,451,811  | panicle weight                | 52, 58, 27    |
| <i>qSWTCT1-2</i>    | SWPlt                     | <i>qSW1-1</i>                                 | 1  | 41,967,890-42,955,596 | 41,861,649 | seed weight                   | 50            |
| <i>qSWTPNCT2-1</i>  | SWPan                     | <i>PNWT2</i>                                  | 2  | 18,225,635-27,038,920 | 18,745,789 | panicle weight                | 84, 60        |
|                     | SWPan                     | <i>GWP2<sup>6)</sup></i>                      | 2  | 18,225,635-27,038,920 | 18,756,457 | grain yield per panicle       | 54            |
| <i>qFERCT2</i>      | Percent sterility         | <i>nfg2</i>                                   | 2  | 17,484,665-21,766,231 | 19,425,953 | filled grain number           | 62            |
|                     | Percent sterility         | <i>qLTG2</i>                                  | 2  | 19,375,071            | 19,375,071 | low temperature germinability | 31            |
| <i>qSWTPNCT2-2</i>  | SWPan                     | <i>yld2.1</i>                                 | 2  | 28,688,829-35,011,706 | 28,665,713 | grain yield                   | 53            |
|                     | SWPan                     | <i>qnob-5</i>                                 | 2  | 26,242,374-28,634,075 | 28,665,713 | no. branches per panicle      | 58            |
| <i>qSWTPNCT5</i>    | SWPan                     | <i>qCTB5<sup>6)</sup></i>                     | 5  | 27,342,022-27,342,124 | 27,195,071 | cold tolerance                | 6             |
| <i>qSWTPNCT6-1</i>  | SWPan                     | <i>qCTS6-1<sup>6)</sup></i>                   | 6  | 5,425,408-5,425,631   | 5,389,785  | cold tolerance                | 1, 55         |
| <i>qFERCT6-4</i>    | Percent sterility         | <i>L63</i>                                    | 6  | 16,769,687            | 16,769,687 | ELSC1                         | 13            |
| <i>qSWTCT6</i>      | SWPlt                     | <i>L66<sup>7)</sup></i>                       | 6  | 24,368,838            | 24,368,838 | RLC                           | 13            |
| <i>qSWTPNCT6-2</i>  | SWPan                     | <i>GWP6</i>                                   | 6  | 22,862,400-26,253,308 | 24,812,032 | grain yield per panicle       | 54, 58        |
|                     | SWPan                     | <i>qple-4</i>                                 | 6  | 24,036,500-28,600,180 | 24,812,032 | panicle length                | 58            |
| <i>qSWTPNCT7-1</i>  | SWPan                     | <i>qLTG7</i>                                  | 7  | 1,905,597             | 1,905,597  | low temperature germinability | 31            |
| <i>qFERCT7</i>      | Percent sterility         | <i>gp7</i>                                    | 7  | 7,232,181-16,874,331  | 14,316,346 | filled grain number           | 59, 61        |
|                     | Percent sterility         | <i>PSS7</i>                                   | 7  | 12,785,560-19,504,131 | 14,316,346 | spikelet sterility            | 54            |
| <i>qSWTCT8-4</i>    | SWPlt                     | <i>L87<sup>7)</sup></i>                       | 8  | 26,645,812            | 26,645,812 | ELSR1                         | 13            |

|                 |                   |                    |    |                       |            |                  |        |
|-----------------|-------------------|--------------------|----|-----------------------|------------|------------------|--------|
| <i>qFERCT12</i> | Percent sterility | L125 <sup>7)</sup> | 12 | 7,312,826             | 7,312,826  | ELSR2            | 13     |
| <i>qSWTCT12</i> | SWPlt             | <i>gw12.1</i>      | 12 | 26,107,904-26,954,947 | 26,116,605 | 100-grain weight | 57     |
|                 |                   | <i>qCTSSR12-1</i>  | 12 | 26,107,904-26,108,004 | 26,116,605 | cold tolerance   | 51, 14 |

<sup>1)</sup> “SWPan” is the mean seed weight per panicle and “SWPlt” is the mean seed weight per plant.

<sup>2)</sup> Trait descriptions (13) are BMR (fresh versus dry biomass ratio after natural chilling stress), ELC2 (electrolyte leakage after natural chilling stress for 7 d), ELSC1 (electrolyte leakage after cold shock for 1 d), ELSR1 (ratio of electrolyte leakage under 1 d cold shock stress to normal condition), ELSR2 (ratio of electrolyte leakage under 3 d cold shock stress to normal condition), and RLC [resistance level (score) under natural chilling stress].

<sup>3)</sup> Most of these QTLs also are identified in GRAMENE (40).

<sup>4)</sup> QTL positions listed in Wang et al. (32) based on the MSU6 annotation, were converted to the MSU7 annotation to identify overlapping QTLs.

<sup>5)</sup> References not cited in the manuscript are listed below.

82. Kashiwagi T, Ishimaru K. Identification and Functional Analysis of a Locus for Improvement of Lodging Resistance in Rice. *Plant Physiol.* 2004;134: 676–683. doi:10.1104/pp.103.029355

83. Shinada H, Iwata N, Sato T, Fujino K. QTL pyramiding for improving of cold tolerance at fertilization stage in rice. *Breed Sci.* 2014; 63(5): 483-488

84. Obara M, Kajiura M, Fukuta Y, Yano M, Hayashi M, Yamaya T, et al. Mapping of QTLs associated with cytosolic glutamine synthetase and NADH-glutamate synthase in rice (*Oryza sativa* L.). *J Exp Bot.* 2001; 52(359): 1209-1217

<sup>6)</sup> SNP near to QTL.

<sup>7)</sup> “L” is for Locus as reported by Lv et al. (13).
