# Supplementary material
Source: publisher figshare collection journal article supplement (https://plos.figshare.com/articles/dataset/_/4744111)
Supplement: Supplementary file 1 [file 1 › S5 Table.pdf]

**S5 Table. Summary of candidate genes co-located with SNPs identified in this study as associated with cold tolerance at the germination and reproductive stages.** These candidate genes were verified as part of cold tolerance studies in other plant species.

| QTL                | Population group /Trait <sup>1)</sup> | Gene           | Chr. | Position (Mb) | Distance from targeted region (bp) | Description                                                                       |
|--------------------|---------------------------------------|----------------|------|---------------|------------------------------------|-----------------------------------------------------------------------------------|
| <b>Germination</b> |                                       |                |      |               |                                    |                                                                                   |
| <i>qCTGERM1-1</i>  | <i>ALL</i>                            | LOC_Os01g02750 | 1    | 0.954-0.956   | 0                                  | protein kinase domain containing protein, expressed                               |
| <i>qCTGERM1-2</i>  | <i>JAPONICA</i>                       | LOC_Os01g07980 | 1    | 3.855-3.856   | 883                                | ankyrin, putative, expressed                                                      |
| <i>qCTGERM1-3</i>  | <i>ALL</i>                            | LOC_Os01g14630 | 1    | 8.191-8.192   | 549                                | polyprenyl synthetase, putative, expressed                                        |
| <i>qCTGERM1-8</i>  | <i>ALL</i>                            | LOC_Os01g71830 | 1    | 41.603-41.604 | 0                                  | glycosyl hydrolases family 17, putative, expressed                                |
| <i>qCTGERM1-9</i>  | <i>JAPONICA</i>                       | LOC_Os01g74470 | 1    | 43.125-43.134 | 0                                  | ABC transporter, ATP-binding protein, putative, expressed                         |
| <i>qCTGERM2-2</i>  | <i>ALL</i>                            | LOC_Os02g12540 | 2    | 6.556-6.558   | 0                                  | cytochrome P450, putative, expressed                                              |
|                    | <i>INDICA</i>                         | LOC_Os02g12540 | 2    | 6.556-6.558   | 0                                  | cytochrome P450, putative, expressed                                              |
|                    | <i>ALL</i>                            | LOC_Os02g36150 | 2    | 21.788-21.791 | 0                                  | cytochrome P450, putative, expressed                                              |
|                    | <i>INDICA</i>                         | LOC_Os02g36140 | 2    | 21.765-21.773 | 65,266                             | terpene synthase, putative, expressed                                             |
|                    | <i>JAPONICA</i>                       | LOC_Os02g36150 | 2    | 21.788-21.791 | 6,740                              | cytochrome P450, putative, expressed                                              |
|                    | <i>temperate japonica</i>             | LOC_Os02g36150 | 2    | 21.788-21.791 | 0                                  | cytochrome P450, putative, expressed                                              |
| <i>qCTGERM2-4</i>  | <i>INDICA</i>                         | LOC_Os02g36210 | 2    | 21.841-21.847 | 2,375                              | ent-kaurene synthase, chloroplast precursor, putative, expressed                  |
|                    | <i>temperate japonica</i>             | LOC_Os04g02410 | 4    | 0.8681-0.8687 | 1,767                              | expressed protein                                                                 |
|                    | <i>JAPONICA</i>                       | LOC_Os04g02450 | 4    | 0.8884-0.8907 | 22,058                             | rust-resistance protein Lr21, putative, expressed                                 |
|                    | <i>ALL</i>                            | LOC_Os04g02850 | 4    | 1.110-1.113   | 3,391                              | pentatricopeptide, putative, expressed                                            |
|                    | <i>INDICA</i>                         | LOC_Os04g45950 | 4    | 27.217-27.214 | 0                                  | amino acid permease family protein, putative, expressed                           |
|                    | <i>JAPONICA</i>                       | LOC_Os04g52800 | 4    | 31.434-31.435 | 508                                | expressed protein                                                                 |
| <i>qCTGERM4-4</i>  | <i>temperate japonica</i>             | LOC_Os04g52920 | 4    | 31.524-31.527 | 443                                | remorin family protein, putative, expressed                                       |
|                    | <i>tropical japonica</i>              | LOC_Os05g36240 | 5    | 21.482-21.485 | 0                                  | expressed protein                                                                 |
| <i>qCTGERM5-1</i>  | <i>tropical japonica</i>              | LOC_Os05g36240 | 5    | 21.482-21.485 | 0                                  | expressed protein                                                                 |
| <i>qCTGERM6-1</i>  | <i>JAPONICA</i>                       | LOC_Os06g11410 | 6    | 6.019-6.021   | 4,656                              | cyclin, putative, expressed                                                       |
| <i>qCTGERM6-2</i>  | <i>ALL</i>                            | LOC_Os06g11650 | 6    | 6.177-6.179   | 166                                | phosphate-induced protein 1 conserved region domain containing protein, expressed |
| <i>qCTGERM7-4</i>  | <i>ALL</i>                            | LOC_Os07g33690 | 7    | 20.129-20.135 | 0                                  | NBS-LRR type disease resistance protein Hom-F, putative, expressed                |
|                    | <i>JAPONICA</i>                       | LOC_Os07g33480 | 7    | 20.012-20.015 | 11,932                             | cytochrome P450 domain containing protein, expressed                              |
|                    | <i>JAPONICA</i>                       | LOC_Os07g33600 | 7    | 20.067-20.068 | 1,234                              | hydroxylase, putative, expressed                                                  |

|                    |                           |                |    |               |        |                                                                   |
|--------------------|---------------------------|----------------|----|---------------|--------|-------------------------------------------------------------------|
|                    | <i>JAPONICA</i>           | LOC_Os07g33670 | 7  | 20.115-20.123 | 300    | patatin-like phospholipase family protein, expressed              |
| <i>qCTGERM8-1</i>  | <i>ALL</i>                | LOC_Os08g17080 | 8  | 10.453-10.458 | 18,135 | PPR repeat domain containing protein, putative, expressed         |
| <i>qCTGERM8-2</i>  | <i>JAPONICA</i>           | LOC_Os08g20420 | 8  | 12.266-12.269 | 1,274  | MGD2, putative, expressed                                         |
| <i>qCTGERM9-1</i>  | <i>INDICA</i>             | LOC_Os09g17670 | 9  | 10.804-10.804 | 1,310  | expressed protein                                                 |
| <i>qCTGERM10-2</i> | <i>tropical japonica</i>  | LOC_Os10g20390 | 10 | 10.249-10.252 | 4,808  | MATE efflux family protein, putative, expressed                   |
| <i>qCTGERM11-3</i> | <i>JAPONICA</i>           | LOC_Os11g28270 | 11 | 16.249-16.258 | 1,004  | zinc finger C-x8-C-x5-C-x3-H type family protein, expressed       |
| <i>qCTGERM11-4</i> | <i>INDICA</i>             | LOC_Os11g29970 | 11 | 17.411-17.417 | 0      | NB-ARC domain containing protein, expressed                       |
| <i>qCTGERM11-5</i> | <i>JAPONICA</i>           | LOC_Os11g33330 | 11 | 19.709-19.718 | 0      | peptidase, M24 family protein, putative, expressed                |
|                    | <i>temperate japonica</i> | LOC_Os11g33330 | 11 | 19.709-19.718 | 0      | peptidase, M24 family protein, putative, expressed                |
| <i>qCTGERM12-2</i> | <i>ALL</i>                | LOC_Os12g42540 | 12 | 26.424-26.425 | 933    | zinc finger, C3HC4 type domain containing protein, expressed      |
|                    | <i>INDICA</i>             | LOC_Os12g42420 | 12 | 26.363-26.365 | 441    | DNA binding protein, putative, expressed                          |
|                    | <i>INDICA</i>             | LOC_Os12g42550 | 12 | 26.425-26.430 | 0      | methyl-CpG binding domain containing protein, putative, expressed |
| <i>qCTGERM12-3</i> | <i>INDICA</i>             | LOC_Os12g43840 | 12 | 27.195-27.281 | 791    | ankyrin repeat domain-containing protein, putative, expressed     |

### Reproductive

|                    |                   |                |   |               |        |                                                                       |
|--------------------|-------------------|----------------|---|---------------|--------|-----------------------------------------------------------------------|
| <i>qSWTPNCT1-1</i> | SWPan             | LOC_Os01g07310 | 1 | 3.446-3.450   | 1,589  | transporter-related, putative, expressed                              |
| <i>qSWTCT1-1</i>   | SWPlt             | LOC_Os01g72190 | 1 | 41.861-41.863 | 87     | glutathione S-transferase, putative, expressed                        |
| <i>qSWTCT1-2</i>   | SWPlt             | LOC_Os01g72250 | 1 | 41.892-41.896 | 0      | uridine 5-monophosphate synthase, putative, expressed                 |
| <i>qSWTPNCT1-3</i> | SWPan             | LOC_Os01g74300 | 1 | 43.046-43.047 | 389    | metallothionein, putative, expressed                                  |
| <i>qSWTPNCT2-1</i> | SWPan             | LOC_Os02g31280 | 2 | 18.746-18.747 | 12,578 | expressed protein                                                     |
| <i>qFERCT2</i>     | Percent sterility | LOC_Os02g32700 | 2 | 19.423-19.423 | 2,003  | autophagy-related protein, putative, expressed                        |
| <i>qSWTPNCT2-2</i> | SWPan             | LOC_Os02g47744 | 2 | 29.190-29.195 | 2,847  | MYB family transcription factor, putative, expressed                  |
| <i>qSWTPNCT5</i>   | SWPan             | LOC_Os05g47470 | 5 | 27.198-27.199 | 3,283  | VIP1 protein, putative, expressed                                     |
| <i>qFERCT6-3</i>   | Percent sterility | LOC_Os06g25250 | 6 | 14.770-14.773 | 123    | endoribonuclease Dicer, putative, expressed                           |
| <i>qSWTCT6</i>     | SWPlt             | LOC_Os06g41300 | 6 | 24.712-24.712 | 1,378  | expressed gene                                                        |
| <i>qSWTPNCT6-1</i> | SWPan             | LOC_Os06g10470 | 6 | 5.388-5.389   | 771    | ZOS6-02 - C2H2 zinc finger protein, expressed                         |
| <i>qFERCT7</i>     | Percent sterility | LOC_Os07g25060 | 7 | 14.303-14.303 | 12,472 | thionin-like peptide, putative, expressed                             |
| <i>qSWTCT7</i>     | SWPlt             | LOC_Os07g38620 | 7 | 23.194-23.199 | 0      | pyridoxamine 5'-phosphate oxidase family protein, putative, expressed |
| <i>qSWTCT8-1</i>   | SWPlt             | LOC_Os08g02094 | 8 | 0.686-0.693   | 0      | GDSL-like lipase/acylhydrolase, putative, expressed                   |
| <i>qSWTPNCT8</i>   | SWPan             | LOC_Os08g05510 | 8 | 2.934-2.940   | 2,060  | MYB family transcription factor, putative, expressed                  |

|                  |       |                |    |               |       |                                                                |
|------------------|-------|----------------|----|---------------|-------|----------------------------------------------------------------|
| <i>qSWTCT8-5</i> | SWPlt | LOC_Os08g44560 | 8  | 28.014-28.020 | 0     | expressed gene                                                 |
| <i>qSWTCT8-2</i> | SWPlt | LOC_Os08g06710 | 8  | 3.763-3.764   | 0     | OsFBDUF42 - F-box and DUF domain containing protein, expressed |
| <i>qSWTCT8-3</i> | SWPlt | LOC_Os08g10608 | 8  | 6.243-6.247   | 962   | ribosomal protein S17, putative, expressed                     |
| <i>qSWTCT12</i>  | SWPlt | LOC_Os12g42130 | 12 | 26.117-26.120 | 2,595 | MATE efflux family protein, putative, expressed                |

<sup>1)</sup> “SWPan” is the mean seed weight per panicle and “SWPlt” is the mean seed weight per plant.
