# Supplementary material
Source: publisher figshare collection journal article supplement (https://plos.figshare.com/articles/dataset/_/4744111)
Supplement: Supplementary file 1 [file 1 › S6 Table.pdf]

**S6 Table. Overlap between candidate genes and significant SNPs.** Regions where position of significant SNPs (Table 2) overlapped with the candidate genes (S5 Table) based on the germination index across the population groups.

| Chromosome | Position of segment (Mb) | SNP position (Mb) | Gene           | Population group(s)                      |
|------------|--------------------------|-------------------|----------------|------------------------------------------|
| 1          | 0.939-1.066              | 0.956             | LOC_Os01g02750 | <i>ALL</i>                               |
| 1          | 3.712-3.995              | 3.856             | LOC_Os01g07980 | <i>JAPONICA</i>                          |
| 1          | 8.161-8.228              | 8.19              | LOC_Os01g14630 | <i>ALL</i>                               |
| 1          | 11.338-11.881            | 11.338            |                | <i>tropical japonica</i>                 |
| 1          | 12.710-12.725            | 12.714            |                | <i>temperate japonica</i>                |
| 1          | 22.892-22.917            | 22.917            |                | <i>JAPONICA</i>                          |
| 1          | 27.060-27.169            | 27.06             |                | <i>JAPONICA</i>                          |
| 1          | 41.518-41.786            | 41.603            | LOC_Os01g71830 | <i>ALL, temperate japonica</i>           |
| 1          | 43.039-43.223            | 43.128            | LOC_Os01g74470 | <i>JAPONICA</i>                          |
| 2          | 1.068-1.655              | 1.329             |                | <i>ALL</i>                               |
| 2          | 6.037-6.624              | 6.557             | LOC_Os02g12540 | <i>ALL, INDICA</i>                       |
| 2          | 8.487-8.905              | 8.885             |                | <i>ALL</i>                               |
| 2          | 21.772-21.872            | 21.797            | LOC_Os02g36140 | <i>ALL, JAPONICA, temperate japonica</i> |
| 2          | 22.650-22.661            | 22.661            |                | <i>ALL</i>                               |
| 4          | 0.866-1.116              | 0.866             | LOC_Os04g02450 | <i>JAPONICA, temperate japonica</i>      |
| 4          | 1.103-1.648              | 1.116             | LOC_Os04g02850 | <i>ALL</i>                               |
| 4          | 27.214-27.766            | 27.214            | LOC_Os04g45950 | <i>INDICA</i>                            |
| 4          | 31.047-32.230            | 31.159            | LOC_Os04g52920 | <i>ALL, JAPONICA, temperate japonica</i> |
| 5          | 21.435-21.485            | 21.484            | LOC_Os05g36240 | <i>tropical japonica</i>                 |
| 6          | 6.142-6.226              | 6.178             | LOC_Os06g11650 | <i>ALL, JAPONICA, INDICA</i>             |
| 7          | 10.464-10.647            | 10.525            |                | <i>tropical japonica</i>                 |
| 7          | 13.211-13.359            | 13.359            |                | <i>tropical japonica</i>                 |
| 7          | 27.860-27.947            | 27.947            |                | <i>tropical japonica</i>                 |
| 7          | 17.133-17.353            | 17.343            |                | <i>ALL</i>                               |

|    |               |        |                |                                     |
|----|---------------|--------|----------------|-------------------------------------|
| 7  | 19.794-20.262 | 20.134 | LOC_Os07g33600 | <i>ALL, JAPONICA</i>                |
| 7  | 20.115-20.123 | 20.123 | LOC_Os07g33670 | <i>JAPONICA</i>                     |
| 8  | 10.438-10.903 | 10.476 | LOC_Os08g17080 | <i>ALL</i>                          |
| 8  | 12.270-12.345 | 12.27  | LOC_Os08g20420 | <i>JAPONICA</i>                     |
| 9  | 10.760-10.911 | 10.806 | LOC_Os09g17670 | <i>INDICA</i>                       |
| 10 | 1.403-1.526   | 1.52   |                | <i>ALL</i>                          |
| 10 | 3.009-3.111   | 3.009  |                | <i>ALL</i>                          |
| 10 | 10.165-10.335 | 10.257 |                | <i>tropical japonica</i>            |
| 11 | 1.6248-1.624  | 1.624  |                | <i>temperate japonica</i>           |
| 11 | 5.590-5.741   | 5.59   |                | <i>ALL</i>                          |
| 11 | 17.303-17.425 | 17.413 | LOC_Os11g29970 | <i>INDICA</i>                       |
| 11 | 19.676-19.770 | 19.718 |                | <i>JAPONICA, temperate japonica</i> |
| 12 | 24.896-24.904 | 24.904 |                | <i>JAPONICA</i>                     |
| 12 | 26.314-26.988 | 26.426 |                | <i>ALL, JAPONICA, INDICA</i>        |
| 12 | 27.195-27.281 | 27.219 |                | <i>INDICA</i>                       |
